# Supplementary material for: Exploring binding chemistry of alkali/alkaline earth cations in solution through modulation of intramolecular charge-transfer in an excited ambidentate organic fluorophore
Source: Royal Society of Chemistry journal article supplement (doi:10.1039/d2cp04691a), 2023-01-01
Supplement: d2cp04691a1.pdf [file d2cp04691a1.pdf]

## SUPPORTING INFORMATION FOR:

### Exploring Binding Chemistry of Alkali/Alkaline Earth Cations in Solution through Modulation of Intramolecular Charge-Transfer in an Excited Ambidentate Organic Fluorophore

Angel H. Romero,<sup>a\*</sup> Lourdes Gotopo,<sup>b</sup> Gustavo Cabrera,<sup>b</sup> Hugo Cerecetto<sup>a,c</sup>

<sup>a</sup>*Grupo de Química Orgánica Medicinal, Instituto de Química Biológica, Facultad de Ciencias, Universidad de la República, Iguá 4225, 11400 Montevideo, Uruguay.*

<sup>b</sup>*Laboratorio de Síntesis Orgánica, Escuela de Química, Facultad de Ciencias, Universidad Central de Venezuela, Los Chaguaramos 1040, Caracas, Venezuela.*

<sup>c</sup>*Área de Radiofarmacia, Centro de Investigaciones Nucleares, Facultad de Ciencias, Universidad de la República, Mataojo 2055, 11400 Montevideo, Uruguay.*

## Table of Contents

|                                                                        |     |
|------------------------------------------------------------------------|-----|
| 1. Experimental Results.....                                           | S2  |
| 2. Fluorophore-metal binding for di-nuclear and tri-nuclear forms..... | S14 |
| 3. References.....                                                     | S20 |
| 4. Output of Theoretical Calculations.....                             | S21 |

## 1. Experimental Results

**Table S1.** Photophysical properties of the  $N^1$ -(aryl)-2-(trifluoromethyl) benzo[*b*][1,8]naphthyridin-4(1*H*)-ones **3g**, **3i** and **3k** in ethanol and ethanol/water (8/2).

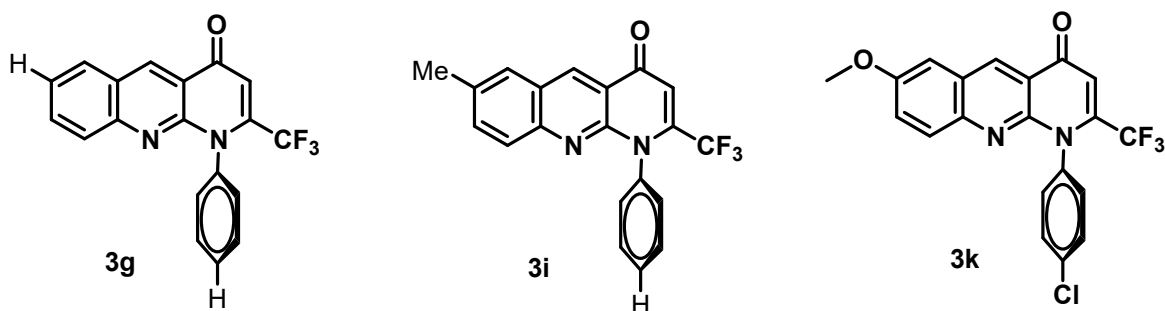

| Probe     | $\lambda_{abs}$ (nm) [ $\epsilon$ ( $M^{-1}\cdot cm^{-1}$ )] <sup>a</sup> | $\lambda_{em}$ (nm) <sup>b</sup> (R.I.) <sup>c</sup> | $\Delta\lambda$ (nm) <sup>d</sup> | $\tau_{1/2} \pm S.D.$ <sup>e</sup> (%) <sup>f</sup> | $\Phi \pm S.D.$ <sup>g</sup> | $\Phi \pm S.D.$ <sup>j</sup> |
|-----------|---------------------------------------------------------------------------|------------------------------------------------------|-----------------------------------|-----------------------------------------------------|------------------------------|------------------------------|
| <b>3g</b> | 332 (15863)                                                               | 426 (1.0)                                            | 42                                | 8.13 $\pm$ 0.30 (37.6)                              | 0.052 $\pm$                  | 0.062 $\pm$                  |
|           | 384 (20293)                                                               | 476 (0.5)                                            | 92                                | 2.27 $\pm$ 0.20 (32.3)                              | 0.004 <sup>h</sup>           | 0.005 <sup>h</sup>           |
|           | 400 (20179)                                                               |                                                      |                                   | 0.44 $\pm$ 0.02 (30.1)                              |                              |                              |
| <b>3i</b> | 332 (< 8000)                                                              | 436 (< 0.5)                                          | 62                                | 3.33 $\pm$ (66.0)                                   | 0.038 $\pm$                  | 0.044 $\pm$                  |
|           | 374 (21758)                                                               | 472 (1.0)                                            | 98                                | 2.75 $\pm$ 0.40 (23.6)                              | 5.5 % <sup>i</sup>           | 0.003                        |
|           |                                                                           |                                                      |                                   | 0.93 $\pm$ 0.30 (10.4)                              |                              |                              |
| <b>3k</b> | 332 (< 8000)                                                              | <b>472 (1.00)</b>                                    | 36                                | 14.20 $\pm$ 0.50 (79.3)                             | 0.237 $\pm$                  | 0.252 $\pm$                  |
|           | 402 (12663)                                                               |                                                      | 74                                | 6.73 $\pm$ 0.90 (20.7)                              | 0.016 <sup>i</sup>           | 0.008 <sup>i</sup>           |
|           | 418 (12959)                                                               |                                                      |                                   |                                                     |                              |                              |

<sup>a</sup>Absorption wavelength and molar absorptivity (in brackets); <sup>b</sup>Emission wavelength at 370 nm excitation; <sup>c</sup>Relative intensity ratio between 426 and 476 emissions; <sup>d</sup>Stoke shift; <sup>e</sup>lifetimes obtained at 370 nm excitation; <sup>f</sup>abundance percentages of excited species; <sup>g</sup>Q.Y. calculated from Rhodamine 6G; <sup>h</sup>Q.Y. for LE-state; <sup>i</sup>Q.Y. for CT-state. <sup>j</sup>Q.Y. in ethanol/water (8/2).

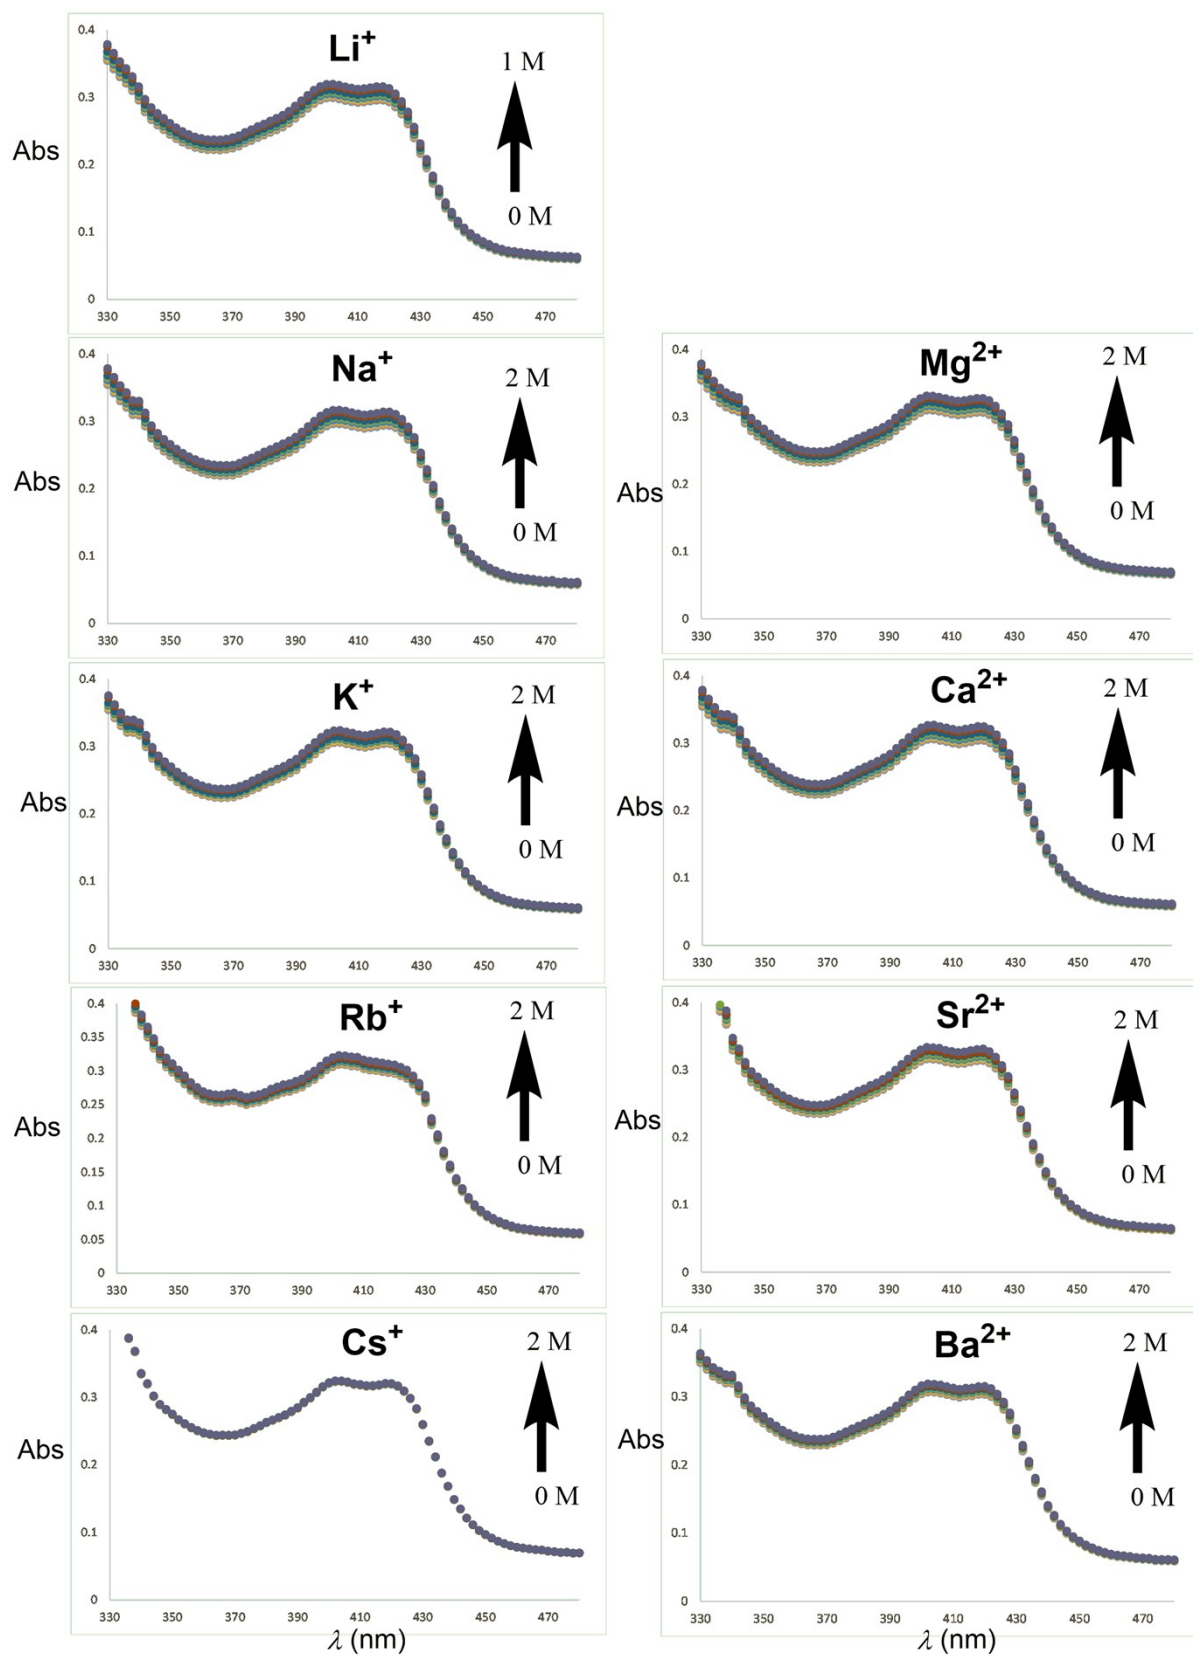

**Figure S1.** Absorption spectra of the probe **3k** in presence of AM cations.

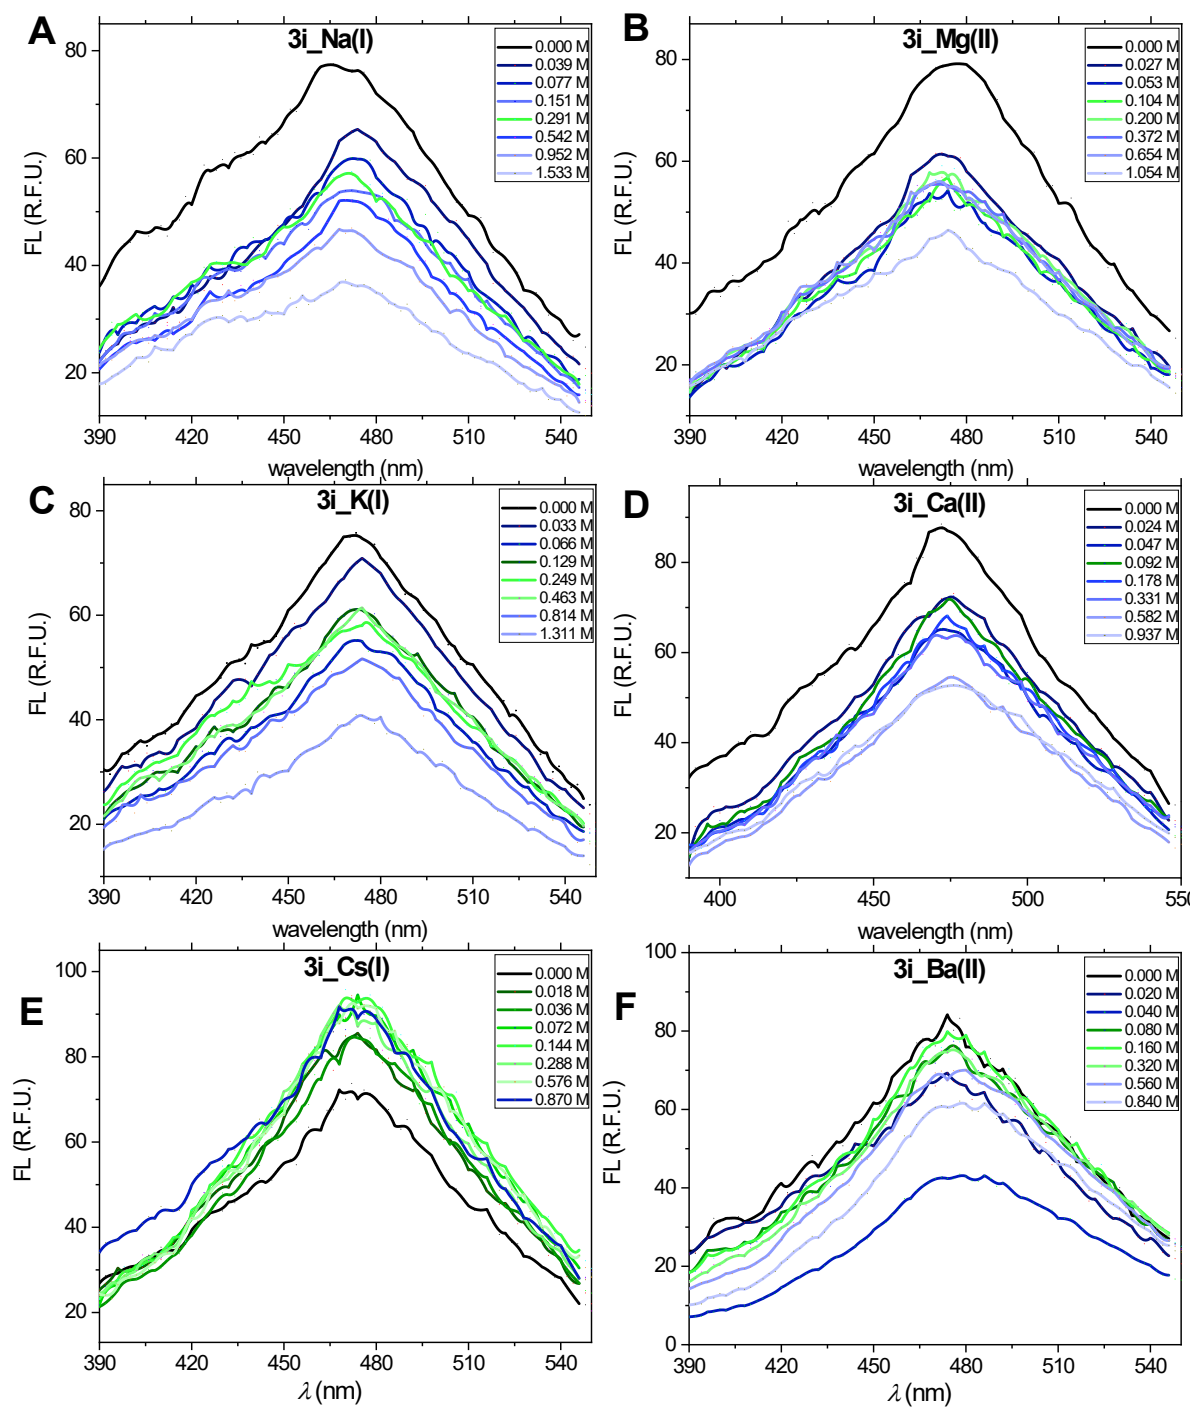

**Figure S2.** Titration of probe **3i** (50  $\mu\text{M}$ ) upon 370 nm excitation in ethanol/water solution (8/2) containing: (A) Na<sup>+</sup>; (B) Mg<sup>2+</sup>; (C) K<sup>+</sup>; (D) Ca<sup>2+</sup>; (E) Cs<sup>+</sup> and (F) Ba<sup>2+</sup>.

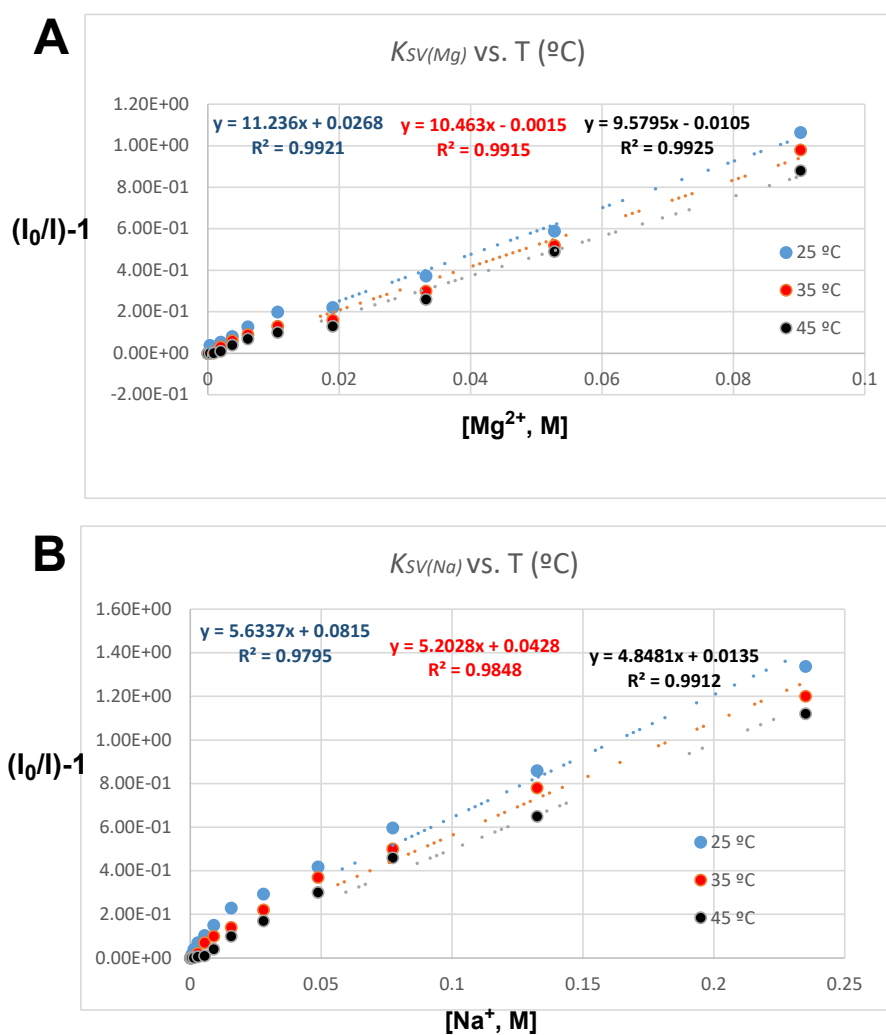

**Figure S3.** Stern-Volmer constant ( $K_{SV}$ ) derived from  $(I_0/I)-1$  vs. cation concentration as function of temperature (25, 35 and 45 °C) for  $Mg^{2+}$  (A) and  $Na^+$  (B) cations.

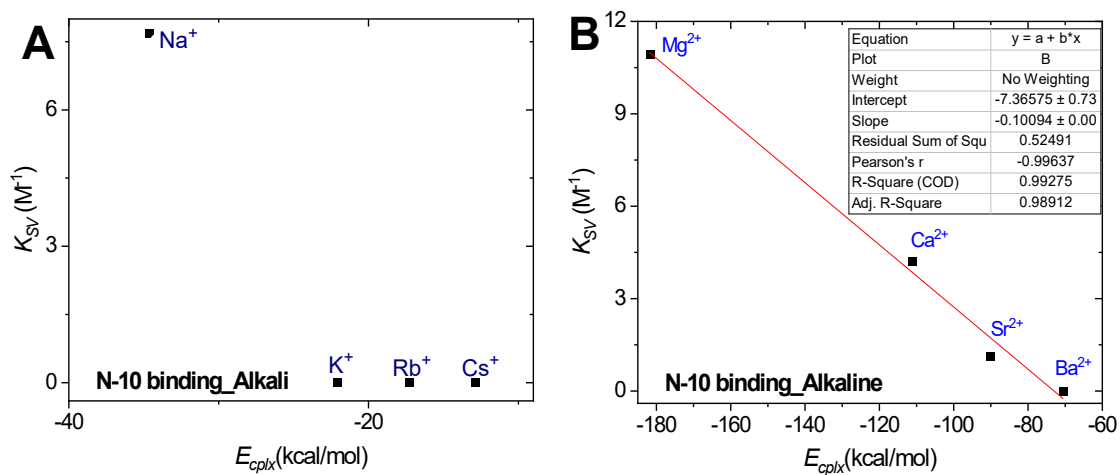

**Figure S4.** Stern-Volmer constant as function of free complexation energy for [3k(N-10)-cation] adduct of alkali (A) and alkaline earth (B) cations.

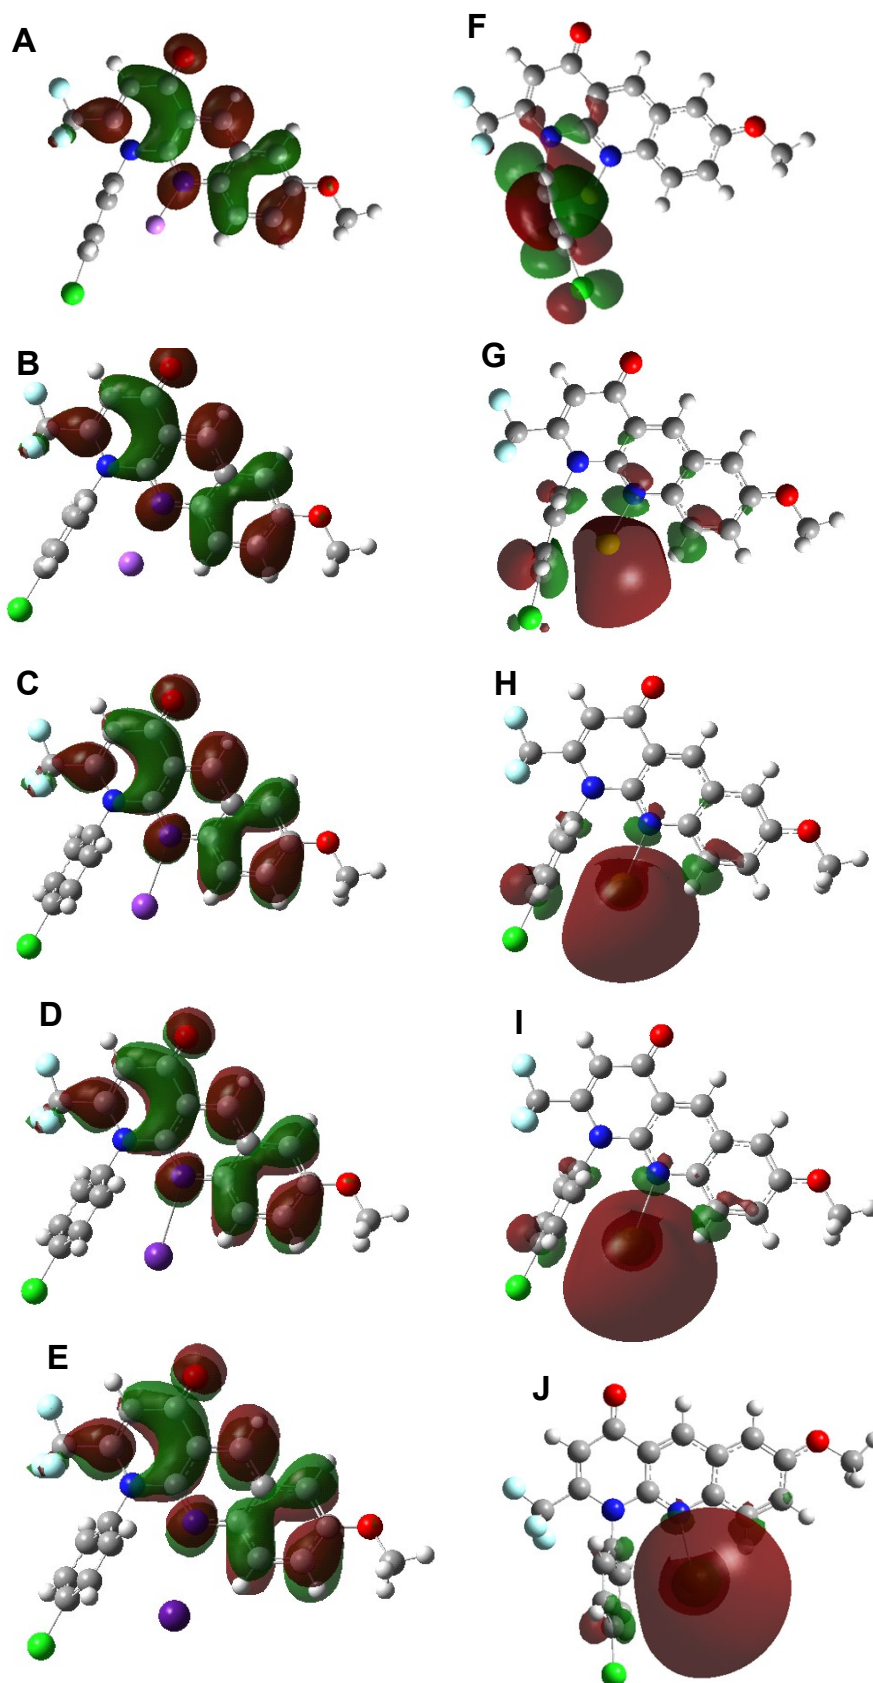

**Figure S5.** LUMO orbital frontiers for the metal-ligand adduct through nitrogen-10. (A)  $\text{Li}^+\text{-3k}$ , (B)  $\text{Na}^+\text{-3k}$ , (C)  $\text{K}^+\text{-3k}$ , (D)  $\text{Rb}^+\text{-3k}$ , (E)  $\text{Cs}^+\text{-3k}$ , (F)  $\text{Be}^{2+}\text{-3k}$ , (G)  $\text{Mg}^{2+}\text{-3k}$ , (H)  $\text{Ca}^{2+}\text{-3k}$ , (I)  $\text{Sr}^{2+}\text{-3k}$ , (J)  $\text{Ba}^{2+}\text{-3k}$ .

**Table S2.** Experimental Stern-Volmer constant for **3k** upon transition cation-binding.

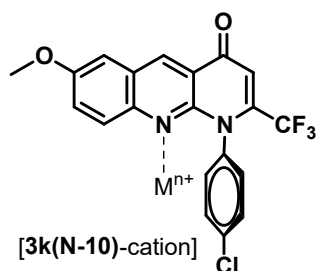

| Entries | [3k(N-10)-M <sup>n+</sup> ] | <i>K<sub>SV</sub></i> |
|---------|-----------------------------|-----------------------|
| 1       | 3k-Mn <sup>2+</sup>         | 10.29 ± 0.04          |
| 2       | 3k-Fe <sup>2+</sup>         | 16.77 ± 0.09          |
| 3       | 3k-Co <sup>2+</sup>         | 23.11 ± 0.14          |
| 4       | 3k-Ni <sup>2+</sup>         | 14.98 ± 0.08          |
| 5       | 3k-Cu <sup>2+</sup>         | 39.02 ± 0.21          |
| 6       | 3k-Zn <sup>2+</sup>         | 1.81 ± 0.03           |

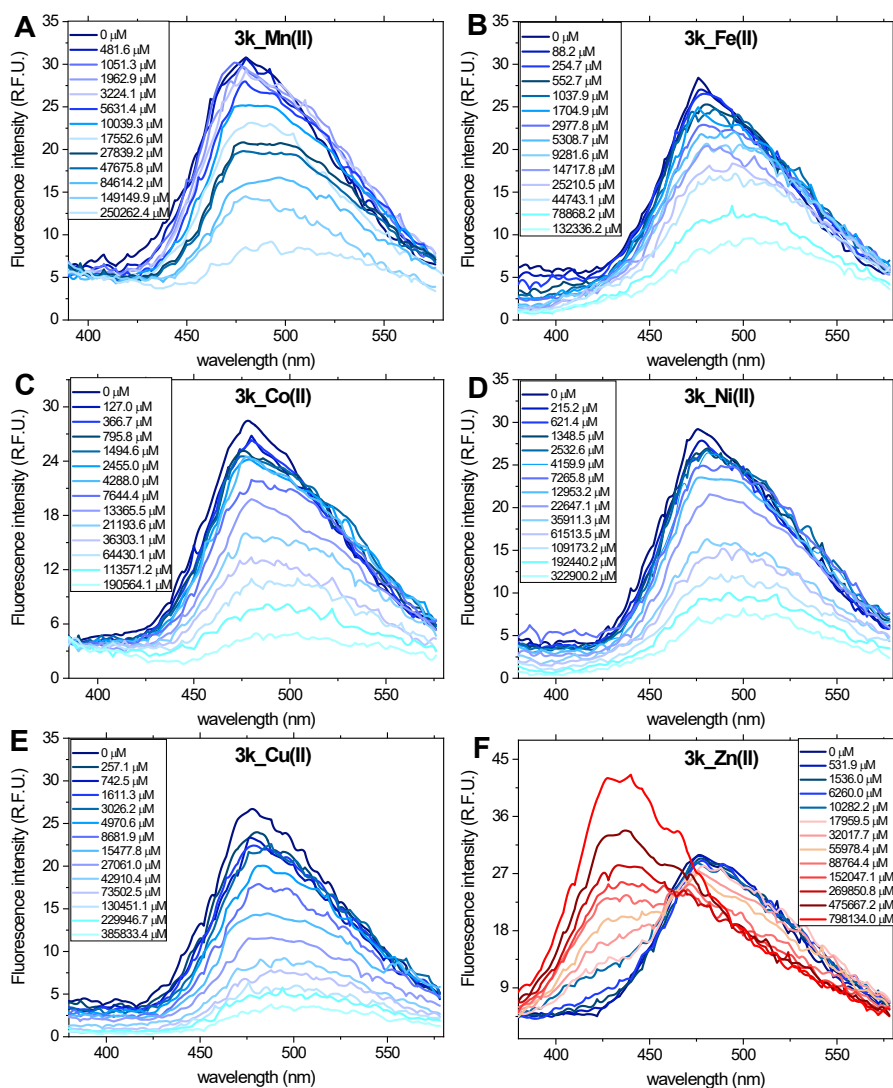

**Figure S6.** Titration of probe **3k** (10  $\mu\text{M}$ ) upon 360 nm excitation under different first row transition metal cations in ethanol/water solution (8/2): (A) Mn<sup>2+</sup>; (B) Fe<sup>2+</sup>; (C) Co<sup>2+</sup>; (D) Ni<sup>2+</sup>; (E) Cu<sup>2+</sup> and (F) Zn<sup>2+</sup>.



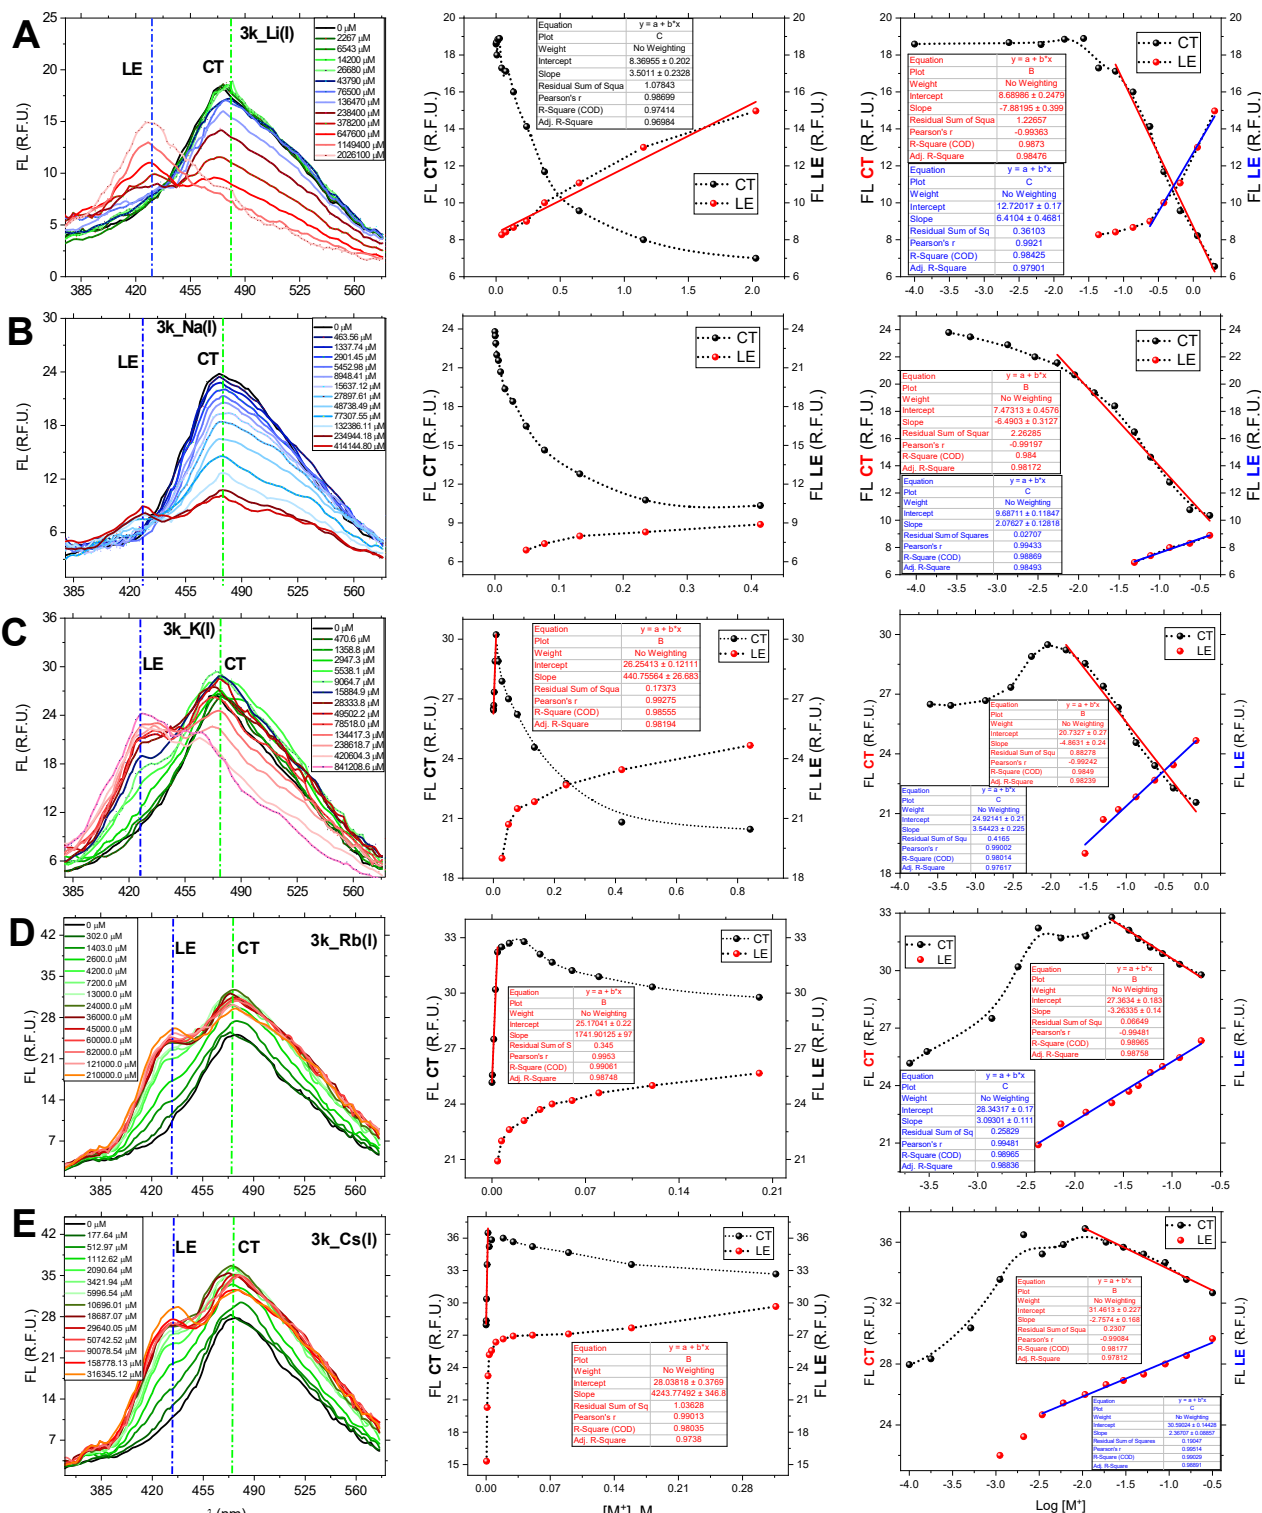

**Figure S7.** Emission spectra (left side) of the 7-methoxy probe **3k** ( $c \sim 8 \mu\text{M}$ ) in presence of the alkali cations (**A:**  $\text{Li}^+$ , **B:**  $\text{Na}^+$ , **C:**  $\text{K}^+$ , **D:**  $\text{Rb}^+$  and **E:**  $\text{Cs}^+$ ). LE- (blue vertical line) and CT-states (green vertical line) are placed at 432 and 476 nm, respectively.  $\text{FL}_{\text{max}}$  vs.  $[\text{M}^+]$  and  $\text{FL}_{\text{max}}$  vs.  $\text{Log} [\text{M}^+]$  plots area placed at central and right side, respectively. Black and red curves are corresponded to CT- and LE-states, respectively.



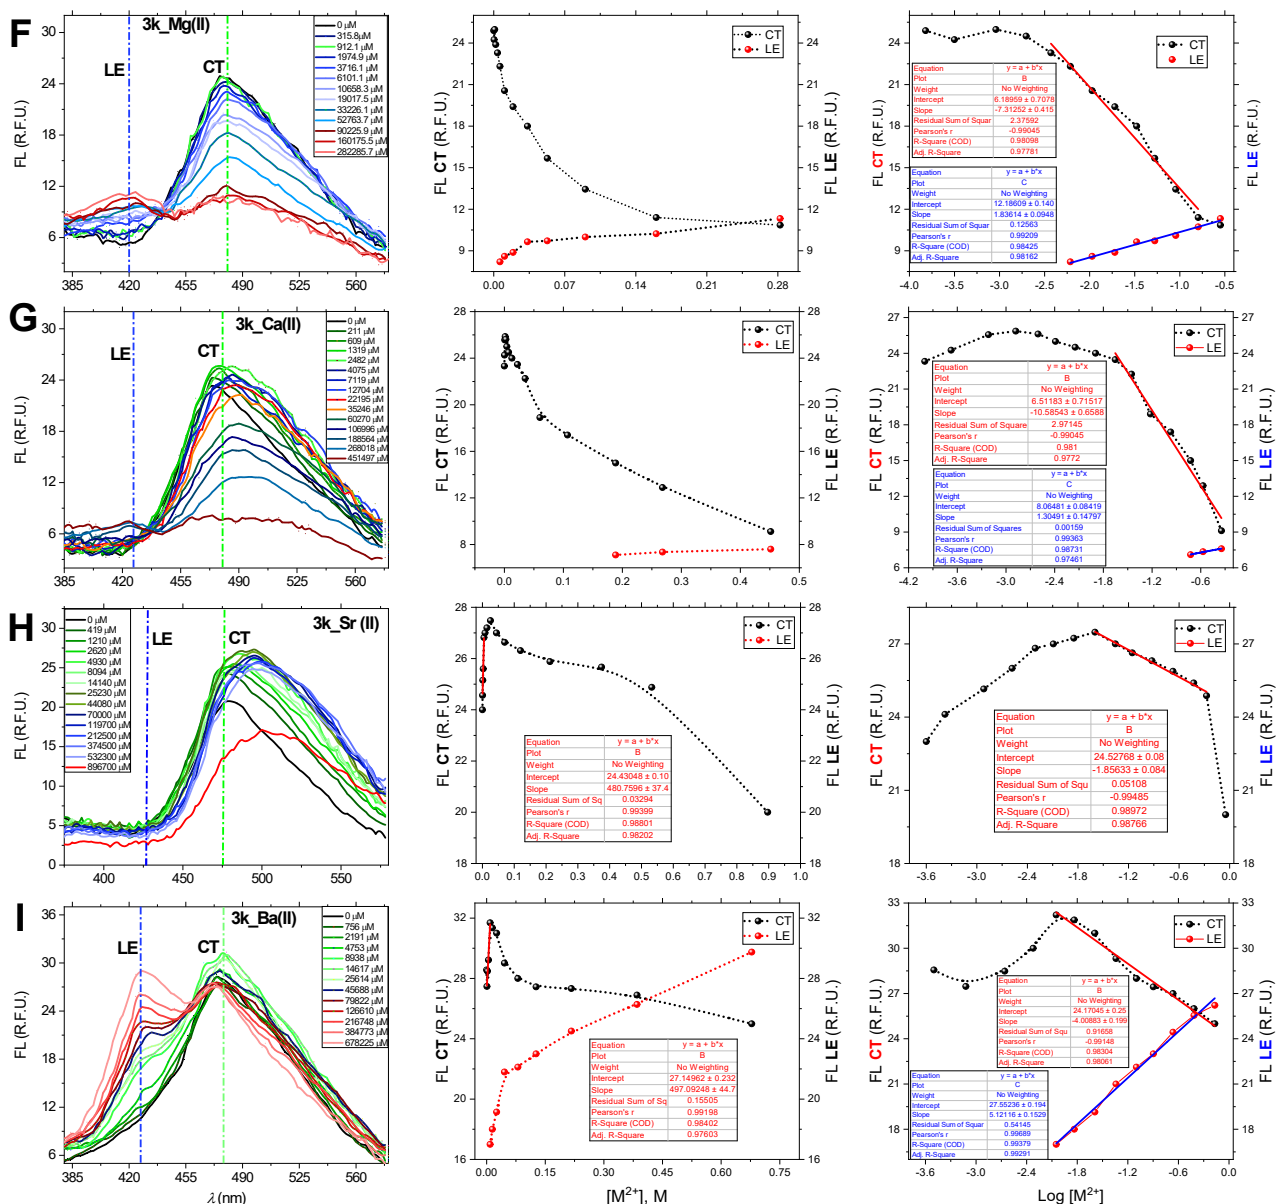

**Figure S8.** Emission spectra (left side) of the 7-methoxy probe **3k** ( $c \sim 8 \mu\text{M}$ ) in presence of the alkaline-earth cations (**F: Mg<sup>2+</sup>**, **G: Ca<sup>2+</sup>**, **H: Sr<sup>2+</sup>** and **I: Ba<sup>2+</sup>**). LE- (blue vertical line) and CT-states (green vertical line) are placed at 432 and 476 nm, respectively.  $\text{FL}_{\text{max}}$  vs.  $[\text{M}^{2+}]$  and  $\text{FL}_{\text{max}}$  vs.  $\text{Log} [\text{M}^{2+}]$  plots are placed at central and right side, respectively. Black and red curves are corresponded to CT- and LE-states, respectively.

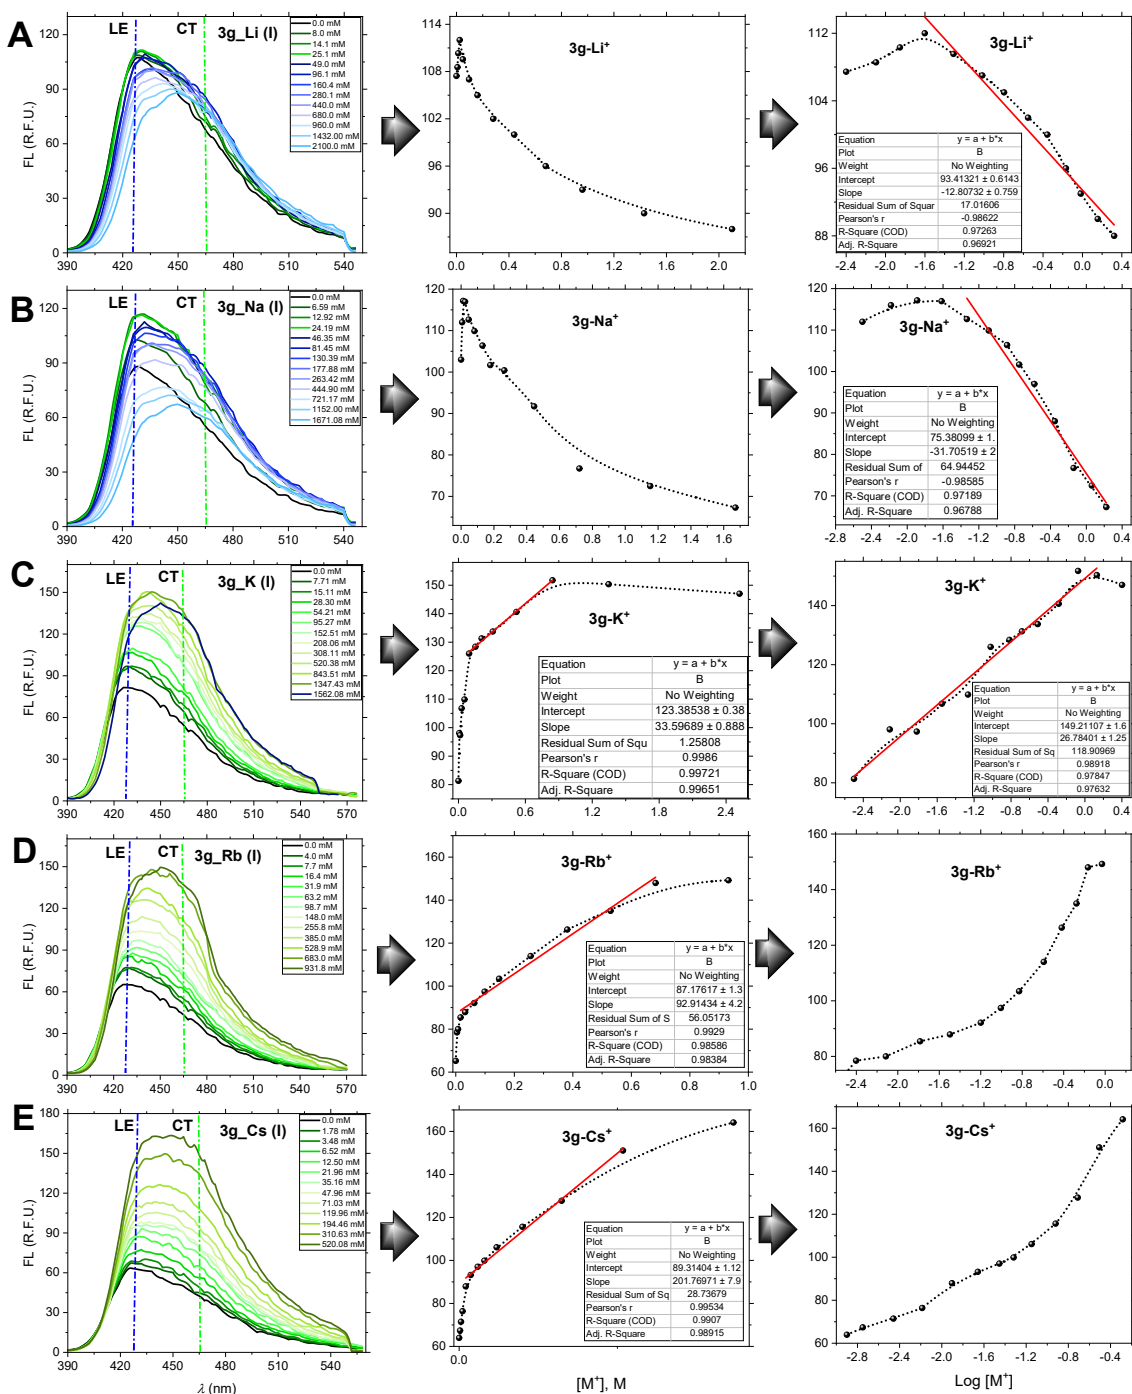

**Figure S9.** Effect of the alkali cations (**A:** Li<sup>+</sup>, **B:** Na<sup>+</sup>, **C:** K<sup>+</sup>, **D:** Rb<sup>+</sup> and **E:** Cs<sup>+</sup>) on the emission spectrum of the 7-methoxy probe **3k** ( $c = 50 \mu\text{M}$ ). LE- (blue vertical line) and CT-states (green vertical line) are placed at 432 and 476 nm, respectively. Second and third row show  $\text{FL}_{\text{max}}$  vs.  $[\text{M}^+]$  and  $\text{FL}_{\text{max}}$  vs.  $\text{Log} [\text{M}^+]$  plots, respectively.

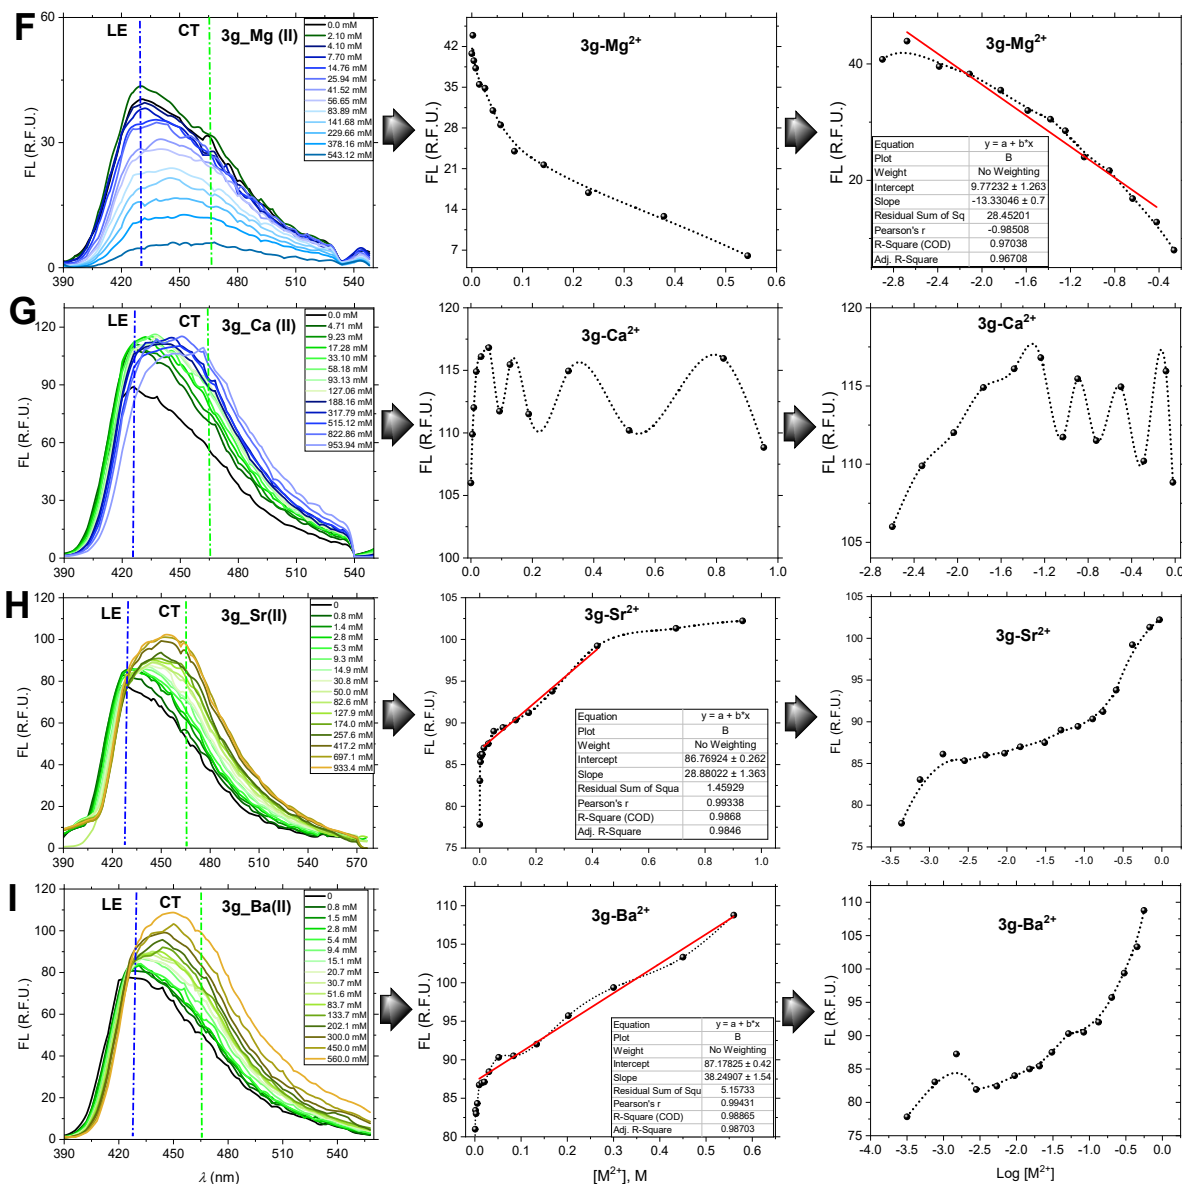

**Figure S10.** Effect of the alkaline-earth cations (**F**:  $\text{Mg}^{2+}$ , **G**:  $\text{Ca}^{2+}$ , **H**:  $\text{Sr}^{2+}$  and **I**:  $\text{Ba}^{2+}$ ) on the emission spectrum of the 7-methoxy probe **3k** ( $c = 50 \mu\text{M}$ ). LE- (blue vertical line) and CT-states (green vertical line) are placed at 432 and 476 nm, respectively. Second and third row show  $\text{FL}_{\text{max}}$  vs.  $[\text{M}^+]$  and  $\text{FL}_{\text{max}}$  vs.  $\text{Log} [\text{M}^+]$  plots, respectively.

**Table S3.** Relative slopes of the **3k**-cation complexation derived from the FL vs. [cation] or FL vs. Log [cation] plots.

| Cation           | FL vs. [cation]                                                  | FL vs. Log [cation]                                          |                                                            | $\Delta s^a$<br>N-10 |
|------------------|------------------------------------------------------------------|--------------------------------------------------------------|------------------------------------------------------------|----------------------|
|                  | Slope CT-enhancement (R <sup>2</sup> )-<br>ionic ketonic binding | Slope CT-decay (R <sup>2</sup> )-<br>methoxy or N-10 binding | Slope LE-enhancement (R <sup>2</sup> )-<br>methoxy binding |                      |
| Li <sup>+</sup>  | ~ 0                                                              | -7.88±0.40 (0.9873) (A.R)                                    | 6.41±0.47 (0.9843)                                         | 1.88                 |
| Na <sup>+</sup>  | ~ 0                                                              | -6.49±0.31 (0.9840) (A.R.)                                   | 2.08±0.13 (0.9887) (0.07-0.4)                              | 6.41                 |
| K <sup>+</sup>   | 440.76±26.68 (0.9856) (0-0.009)                                  | -4.86±0.24 (0.9849) (0.009-0.8)                              | 3.54±0.23 (0.9801) (0.009-0.8)                             | 1.32                 |
| Rb <sup>+</sup>  | 1741.90±97.01(0.9906) (0-0.004)                                  | -3.26±0.14 (0.9897) (0.024-0.2)                              | 3.09±0.11 (0.9897) (0.07-0.2)                              | 0.17                 |
| Cs <sup>+</sup>  | 4243.77±346.8(0.9804) (0-0.002)                                  | -2.76±0.17 (0.9818) (0.002-0.3)                              | 2.37±0.09 (0.9903) (0.002-0.3)                             | 0.39                 |
| Mg <sup>2+</sup> | ~ 0                                                              | -7.31±0.42 (0.9810) (A.R)                                    | 1.84±0.09 (0.9843) (0.019-0.28)                            | 4.47                 |
| Ca <sup>2+</sup> | 1830. (0-0.001)                                                  | -10.59±0.66(0.9810) (0.001-0.4)                              | 1.30±0.14 (0.9873) (0.10-0.45)                             | 9.29                 |
| Sr <sup>2+</sup> | 480.76±37.40 (0.9880) (0-0.008)                                  | -1.86±0.08 (0.9897) (0.025-0.9)                              | ~ 0                                                        | 1.86                 |
| Ba <sup>2+</sup> | 497.09±44.7 (0.9840) (0-0.009)                                   | -4.01±0.20 (0.9830) (0.009-0.7)                              | 5.12±0.15 (0.9938) (0.014-0.7)                             | -1.11                |

<sup>a</sup> $\Delta s$ : difference between the absolute magnitudes of the slope of the CT-decay with the slope of the LE-enhancement.

<sup>b</sup>Concentration range for Li<sup>+</sup> (0.14-2.0 M). 3.50±0.23(0.9741)<sup>b</sup> A.R.: all concentration range.

**Table S4.** Relative slopes of the metal-dye complexation derived from the FL vs. [cation] or FL vs. Log [cation] plots for **3g**.

| Entries | Cation           | Slope FL vs. [cation] | Slope FL vs. Log [cation] |
|---------|------------------|-----------------------|---------------------------|
| 1       | Li <sup>+</sup>  | ~ 0 (slow exp. decay) | -12.81±0.76 (0.9726)      |
| 2       | Na <sup>+</sup>  | ~ 0 (exp. decay)      | -31.71±2.00 (0.9718)      |
| 3       | K <sup>+</sup>   | 33.60±0.89 (0.9972)   | 26.78±1.25 (0.9785)       |
| 4       | Rb <sup>+</sup>  | 92.91±4.20(0.9859)    | exp. Enhancement          |
| 5       | Cs <sup>+</sup>  | 201.77±7.90(0.9907)   | exp. Enhancement          |
| 6       | Mg <sup>2+</sup> | ~ 0 (exp. decay)      | -13.33±0.70 (0.9704)      |
| 7       | Ca <sup>2+</sup> | Sinusoide             | Sinusoide                 |
| 8       | Sr <sup>2+</sup> | 28.88±1.36 (0.9868)   | exp. Enhancement          |
| 9       | Ba <sup>2+</sup> | 38.25±1.54 (0.9887)   | exp. Enhancement          |

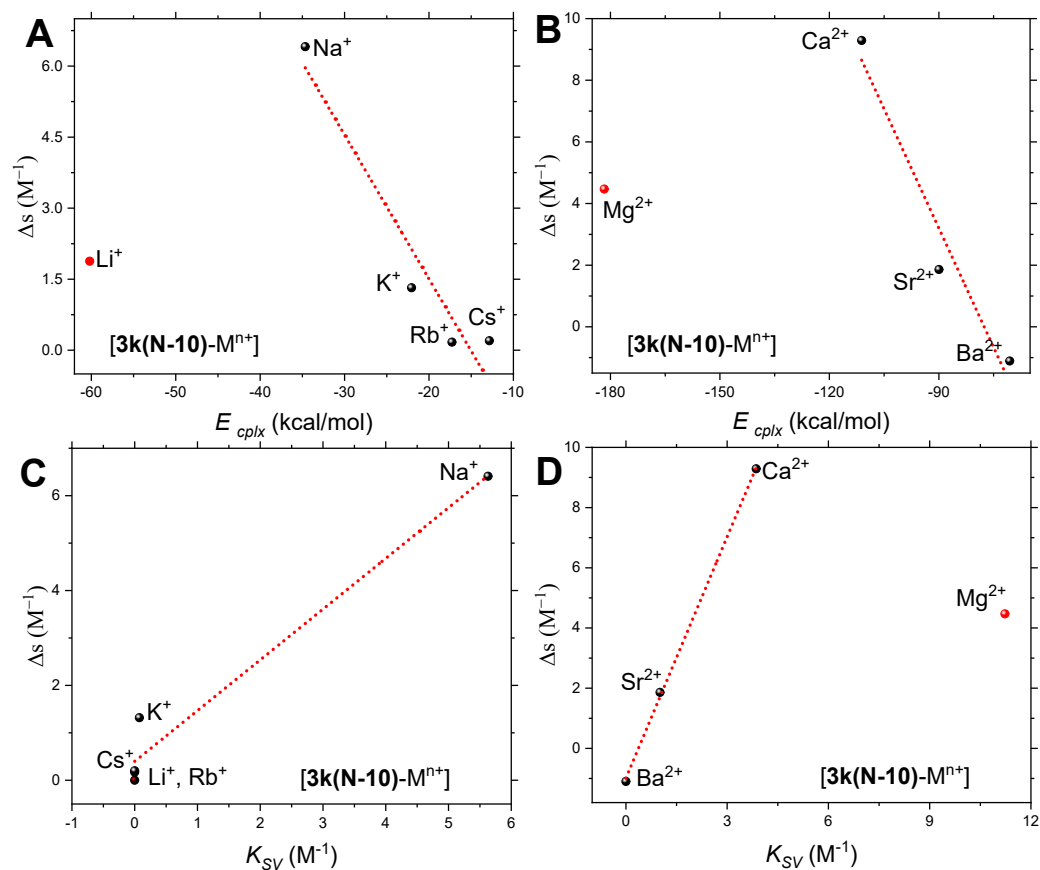

**Figure S11.** Correlation of slope difference ( $\Delta s$ ) vs. free complexation energy,  $E_{cplx}$ , for alkali (A) and alkaline earth (B) cations, and slope difference ( $\Delta s$ ) vs. Stern-Volmer constant for alkali (C) and alkaline earth (D) cations.

**Table S5.** Binding affinities, structural parameters derived from  $[3k(N-10)-M^{n+}]$  adduct.

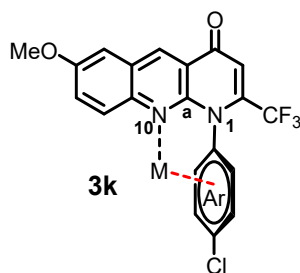

| Entries | Cation           | $E_{cplx}$ (kcal/mol) <sup>a</sup> | $d_{M-N10}$ <sup>b</sup> | $d_{M-Ar}$ <sup>c</sup> | $d_{M-N10-Ca}$ <sup>d</sup> | $d_{M-N10-C-N1}$ <sup>e</sup> |
|---------|------------------|------------------------------------|--------------------------|-------------------------|-----------------------------|-------------------------------|
| 1       | Li <sup>+</sup>  | -60.19                             | 1.9801                   | 2.2701                  | 120.3879                    | -0.0026                       |
| 2       | Na <sup>+</sup>  | -34.65                             | 2.4166                   | 2.8361                  | 128.3516                    | 6.1424                        |
| 3       | K <sup>+</sup>   | -22.06                             | 2.8072                   | 3.1703                  | 129.4703                    | 31.3517                       |
| 4       | Rb <sup>+</sup>  | -17.27                             | 3.049                    | 3.3787                  | 128.5918                    | 41.0289                       |
| 5       | Cs <sup>+</sup>  | -12.84                             | 3.3402                   | 3.6298                  | 127.3026                    | 49.4469                       |
| 6       | Be <sup>2+</sup> | -337.14                            | 1.6143                   | 1.8856                  | 112.7465                    | -0.0037                       |
| 7       | Mg <sup>2+</sup> | -181.69                            | 2.0183                   | 2.4747                  | 122.7987                    | 0.0042                        |
| 8       | Ca <sup>2+</sup> | -111.16                            | 2.3801                   | 2.8816                  | 130.321                     | 11.2776                       |
| 9       | Sr <sup>2+</sup> | -89.97                             | 2.5414                   | 3.0533                  | 131.6779                    | 20.8143                       |
| 10      | Ba <sup>2+</sup> | -70.57                             | 2.7437                   | 3.2545                  | 131.8667                    | 30.284                        |

<sup>a</sup>Complexation energy calculated by using CP model; <sup>b</sup>M-N binding distance expressed in Å; <sup>c</sup>M-arene distance expressed in Å; <sup>d</sup>M-N<sub>10</sub>-C<sub>a</sub> bond angle; <sup>e</sup>M-N<sub>10</sub>-C<sub>a</sub>-N<sub>1</sub> dihedral angle.

## 2. Theoretical di-nuclear and tri-nuclear 3k-metal adducts

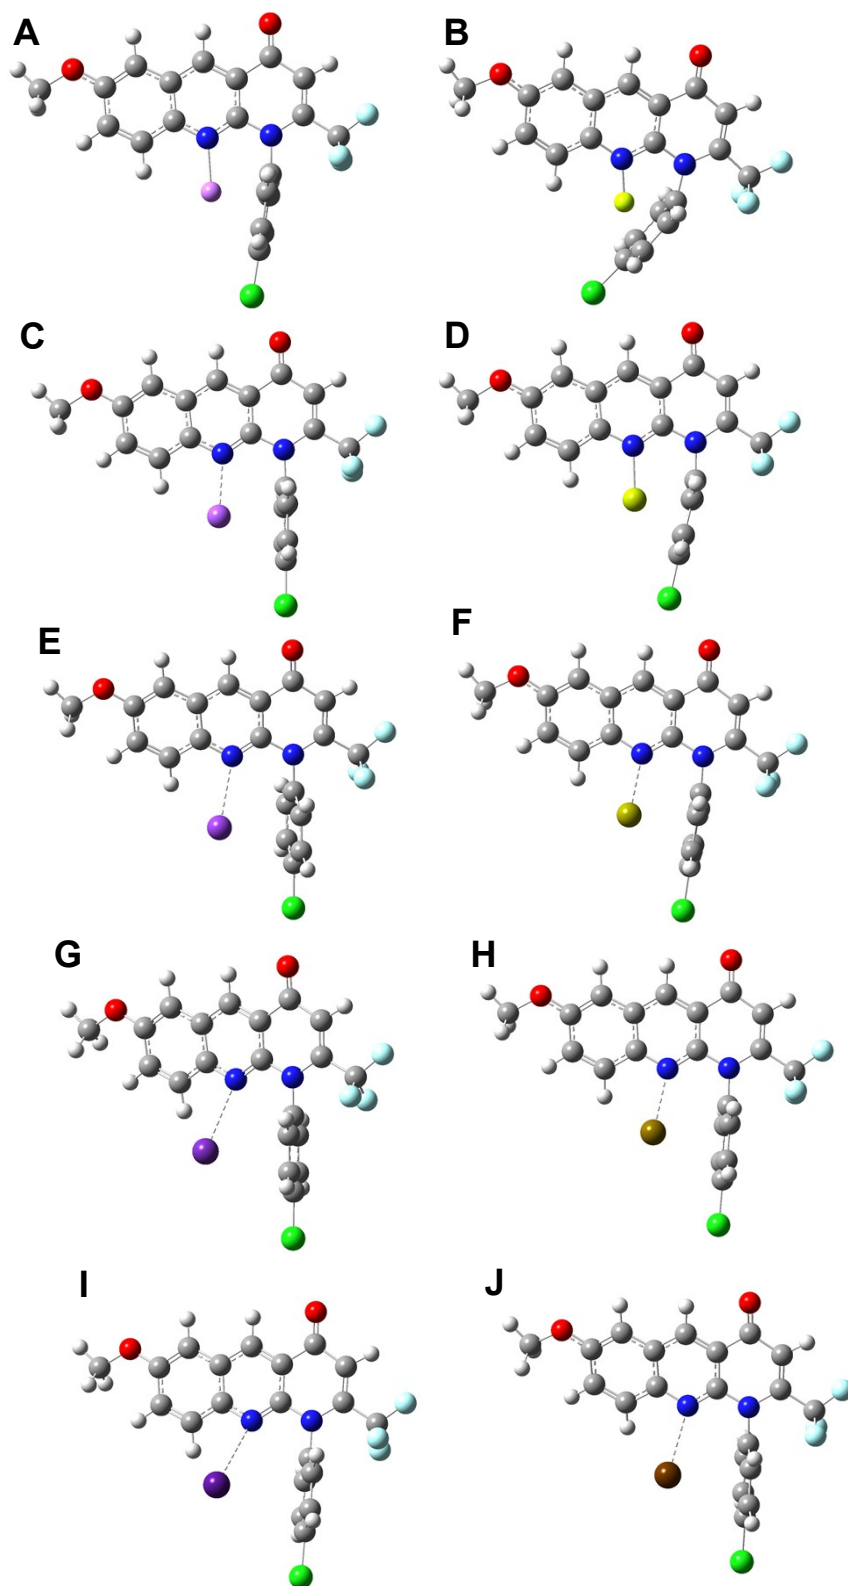

**Figure S12.** Binding preference of the ambidentate ligand **3k** with one molecule of  $\text{Li}^+$  (A),  $\text{Be}^{2+}$  (B),  $\text{Na}^+$  (C),  $\text{Mg}^{2+}$  (D),  $\text{K}^+$  (E),  $\text{Ca}^{2+}$  (F),  $\text{Rb}^+$  (G),  $\text{Sr}^{2+}$  (H),  $\text{Cs}^+$  (I) and  $\text{Ba}^{2+}$  (J) upon counter-poise (CP) model.

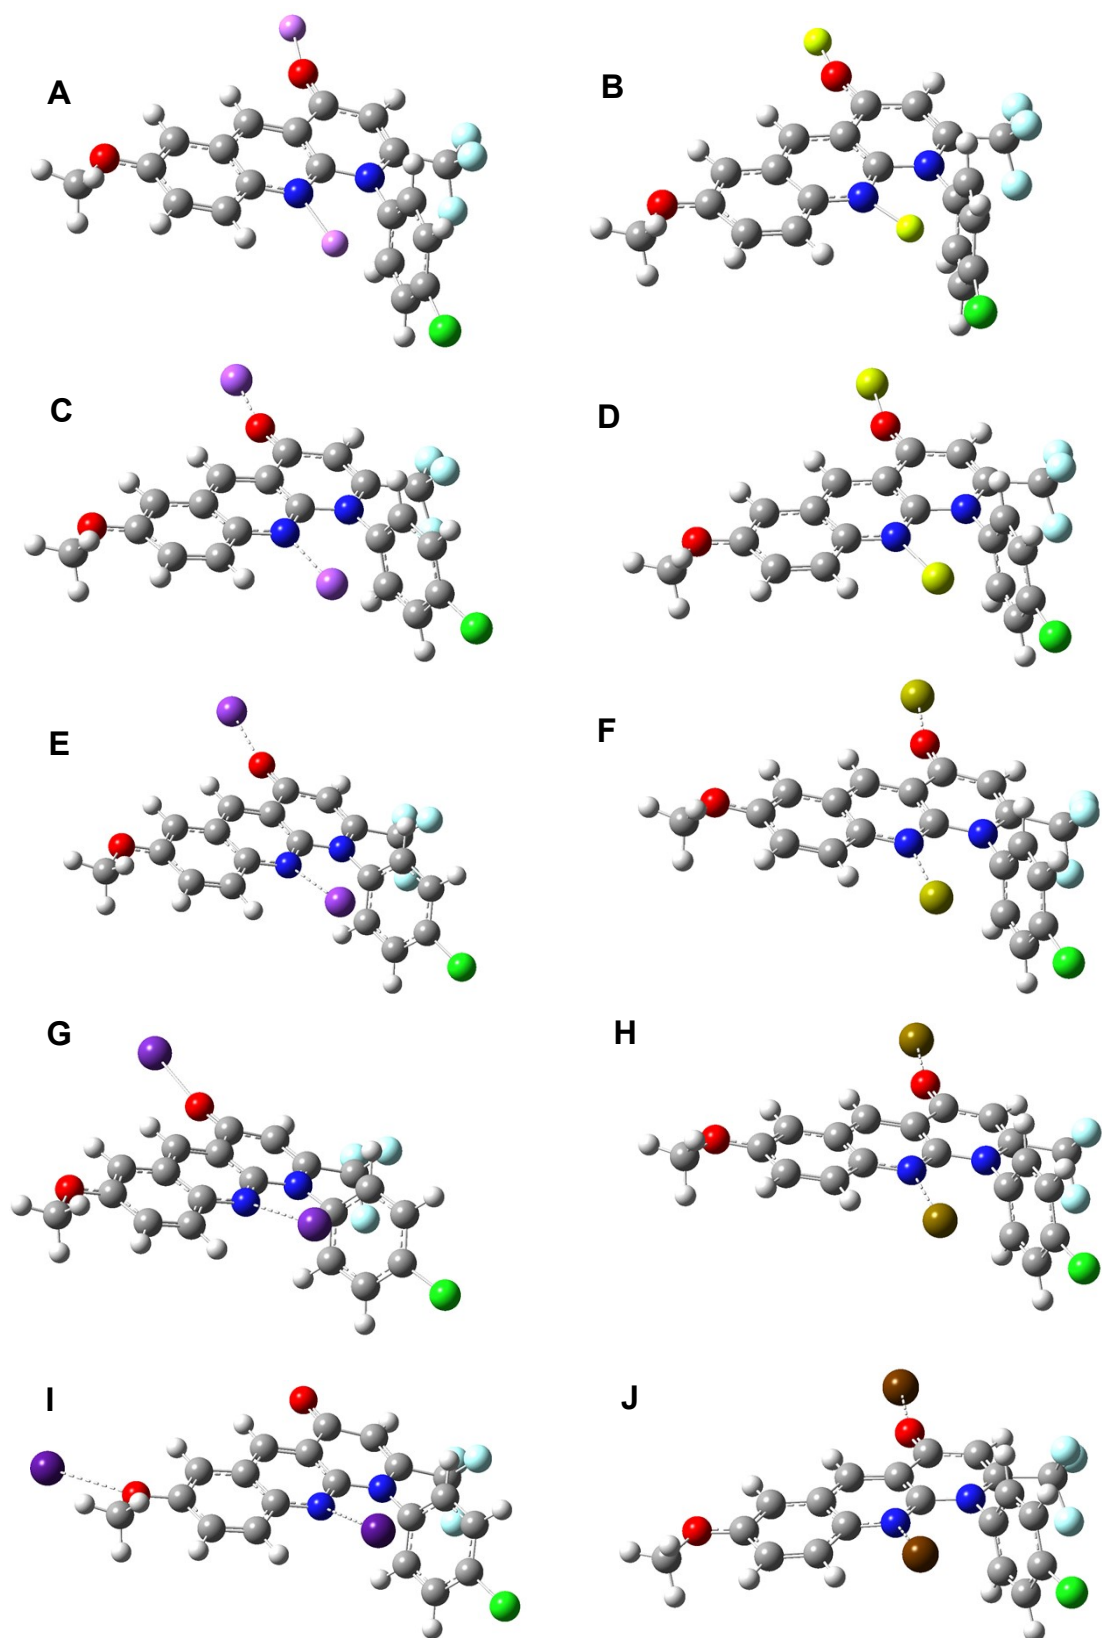

**Figure S13.** Binding preference of the ambidentate ligand **3k** with two molecule of  $\text{Li}^+$  (A),  $\text{Be}^{2+}$  (B),  $\text{Na}^+$  (C),  $\text{Mg}^{2+}$  (D),  $\text{K}^+$  (E),  $\text{Ca}^{2+}$  (F),  $\text{Rb}^+$  (G),  $\text{Sr}^{2+}$  (H),  $\text{Cs}^+$  (I) and  $\text{Ba}^{2+}$  (J) upon counter-poise (CP) model.



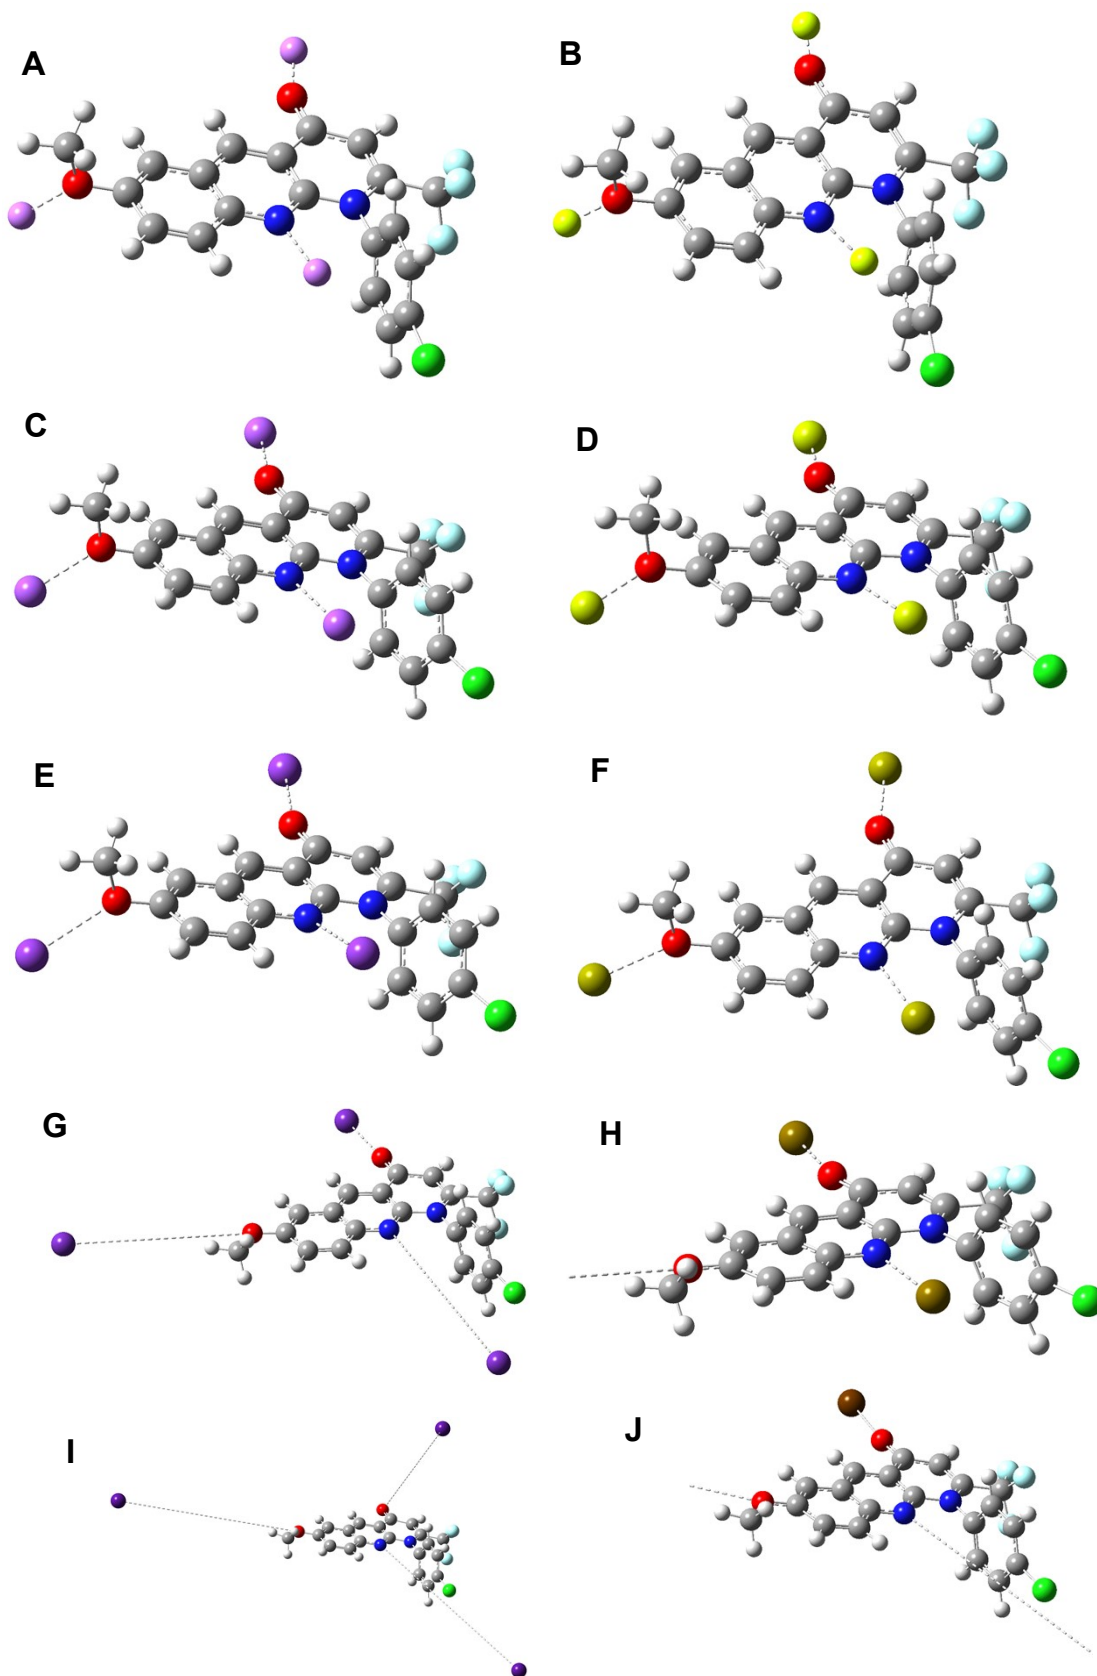

**Figure S14.** Binding preference of the ambidentate ligand **3k** with three molecule of  $\text{Li}^+$  (A),  $\text{Be}^{2+}$  (B),  $\text{Na}^+$  (C),  $\text{Mg}^{2+}$  (D),  $\text{K}^+$  (E),  $\text{Ca}^{2+}$  (F),  $\text{Rb}^+$  (G),  $\text{Sr}^{2+}$  (H),  $\text{Cs}^+$  (I) and  $\text{Ba}^{2+}$  (J) upon counter-poise (CP) model.

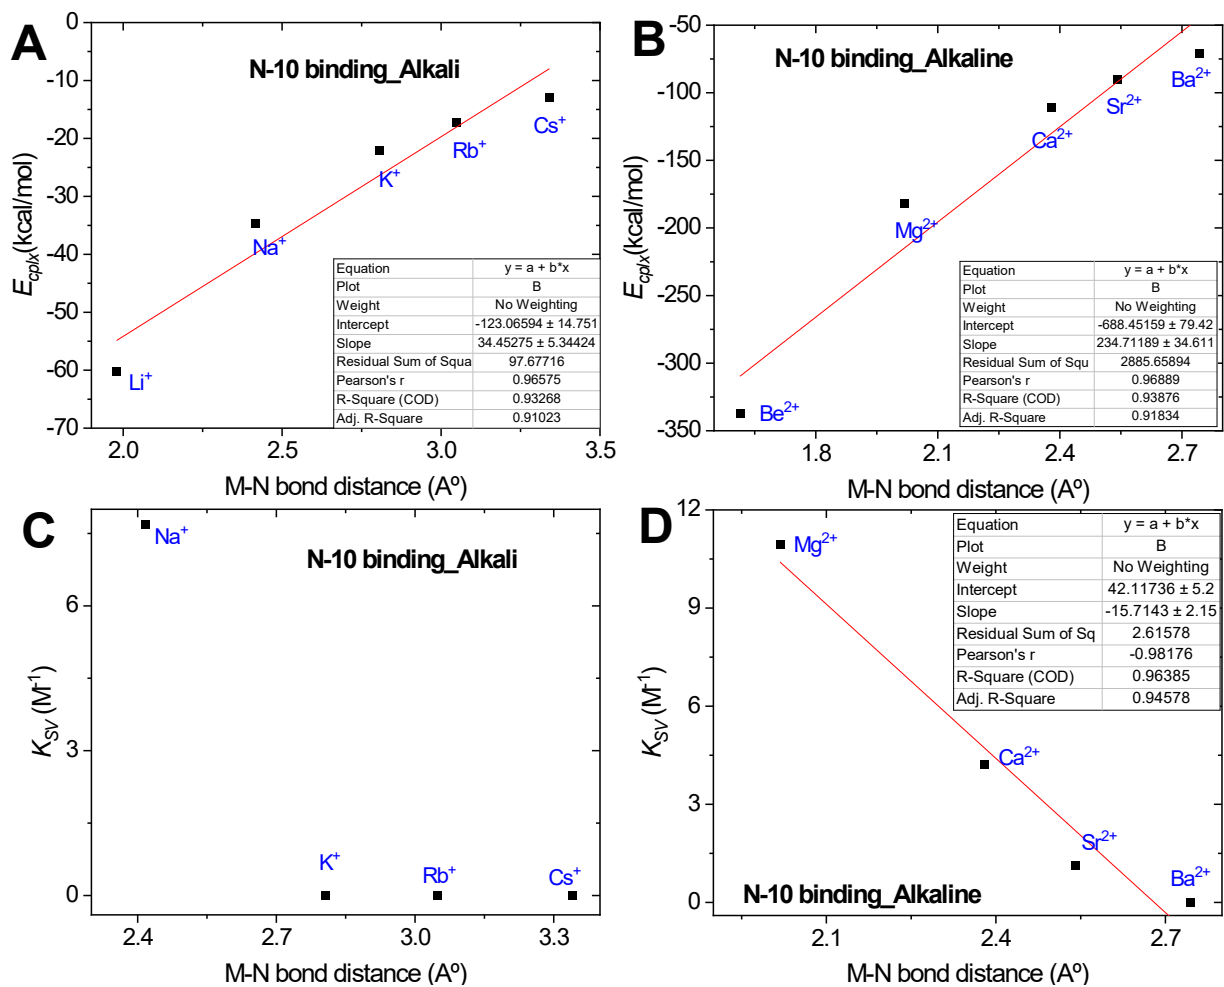

**Figure S15.** Correlation of the complexation energy (A-B) cations and with Stern-Volmer constant (C-D) as function of the M-N bond distance.

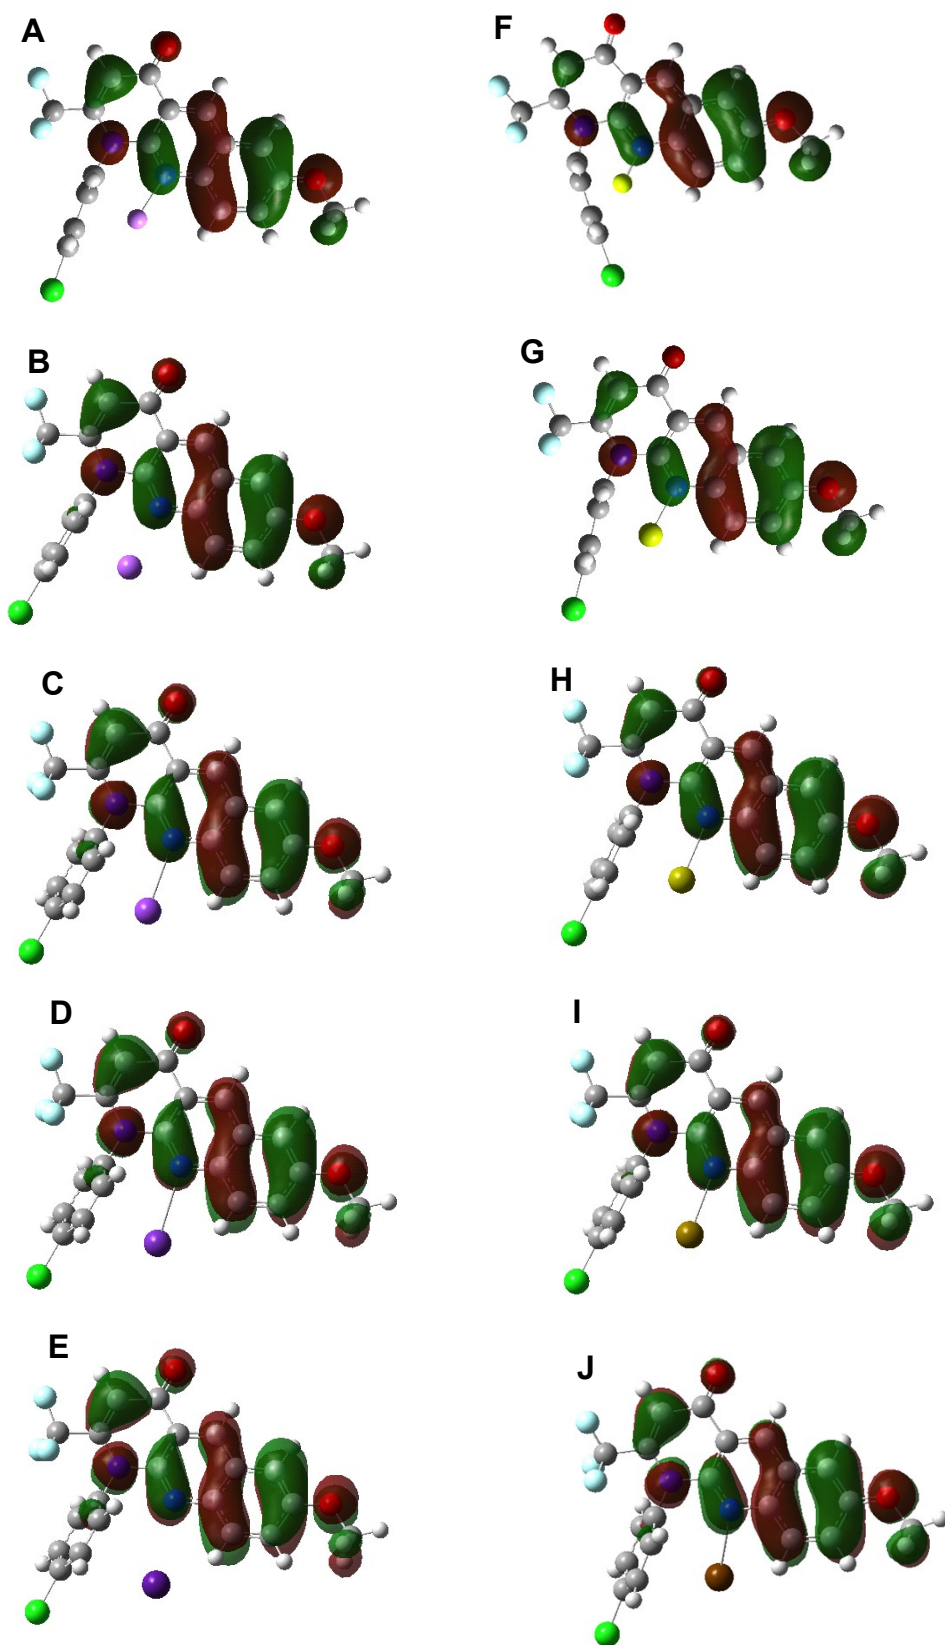

**Figure S16.** HOMO orbital frontiers for the metal-ligand adduct through nitrogen-10. (A)  $\text{Li}^+\text{-3k}$ , (B)  $\text{Na}^+\text{-3k}$ , (C)  $\text{K}^+\text{-3k}$ , (D)  $\text{Rb}^+\text{-3k}$ , (E)  $\text{Cs}^+\text{-3k}$ , (F)  $\text{Be}^{2+}\text{-3k}$ , (G)  $\text{Mg}^{2+}\text{-3k}$ , (H)  $\text{Ca}^{2+}\text{-3k}$ , (I)  $\text{Sr}^{2+}\text{-3k}$ , (J)  $\text{Ba}^{2+}\text{-3k}$ .

**Table S6.** Binding affinities, structural parameters and HOMO-LUMO levels derived from the dinuclear interaction of ambidentate ligand **3k** with the indicated cation.

| Metal            | $E_{cplx}$ (kcal/mol) <sup>a</sup> | $d_{M-N10}$ <sup>b</sup> | $d_{M-Ar}$ <sup>b</sup> | $d_{M-N10-Ca}$ <sup>d</sup> | $d_{M-N10-C-N1}$ <sup>e</sup> | $d_{M-O}$ <sup>f</sup> | $d_{M-C-O}$ <sup>g</sup> | $d_{M-C-C-O}$ <sup>h</sup> |
|------------------|------------------------------------|--------------------------|-------------------------|-----------------------------|-------------------------------|------------------------|--------------------------|----------------------------|
| Li <sup>+</sup>  | -70.07                             | 1.98                     | 2.27                    | 120.388                     | -0.0026                       | 1.7561                 | 162.554                  | -0.0501                    |
| Na <sup>+</sup>  | -29.83                             | 2.417                    | 2.836                   | 128.352                     | 6.1424                        | 2.1889                 | 160.3707                 | 0.0493                     |
| K <sup>+</sup>   | -10.45                             | 2.807                    | 3.17                    | 129.47                      | 31.3517                       | 2.5739                 | 162.5025                 | 3.7023                     |
| Rb <sup>+</sup>  | -3.62                              | 3.049                    | 3.379                   | 128.592                     | 41.0289                       | 2.7961                 | 161.8200                 | 6.3506                     |
| Cs <sup>+</sup>  | 16.07                              | 3.34                     | 3.63                    | 127.303                     | 49.4469                       | 3.4586                 | 129.3247                 | 29.2392                    |
| Be <sup>2+</sup> | -386.5                             | 1.614                    | 1.886                   | 112.747                     | -0.0037                       | 1.4121                 | 163.9042                 | -0.0905                    |
| Mg <sup>2+</sup> | -140.39                            | 2.018                    | 2.475                   | 122.799                     | 0.0042                        | 1.8395                 | 159.3862                 | -0.9094                    |
| Ca <sup>2+</sup> | -38                                | 2.38                     | 2.882                   | 130.321                     | 11.2776                       | 2.2249                 | 162.4731                 | -0.0139                    |
| Sr <sup>2+</sup> | -8.65                              | 2.541                    | 3.053                   | 131.678                     | 20.8143                       | 2.4036                 | 162.2132                 | 0.0072                     |
| Ba <sup>2+</sup> | 16.17                              | 2.744                    | 3.255                   | 131.867                     | 30.284                        | 2.6182                 | 161.8687                 | 3.4319                     |

<sup>a</sup>Complexation energy calculated by using CP model; <sup>b</sup>M-N binding distance against N-10 (expressed in Å); <sup>c</sup>M-arene distance expressed in Å; <sup>d</sup>M-N<sub>10</sub>-C<sub>a</sub> bond angle; <sup>e</sup>M-N<sub>10</sub>-C<sub>a</sub>-N<sub>1</sub> dihedral angle; <sup>f</sup>M-O binding distance against oxygen ketonic (expressed in Å); <sup>g</sup>M-C-O bond angle for ketonic moiety; <sup>h</sup>M-C-C-O dihedral angle for ketonic moiety.

**Table S7.** Binding affinities, structural parameters and HOMO-LUMO levels derived from the trinuclear interaction of ambidentate ligand **3k** with the indicated cation.

| Metal            | $E_{cplx}$ (kcal/mol) <sup>a</sup> | $d_{M-N10}$ <sup>b</sup> | $d_{M-Ar}$ <sup>b</sup> | $d_{M-N10-Ca}$ <sup>d</sup> | $d_{M-N10-C-N1}$ <sup>e</sup> | $d_{M-O}$ <sup>f</sup> | $d_{M-C-O}$ <sup>g</sup> | $d_{M-C-C-O}$ <sup>h</sup> | $d_{M-N10}$ <sup>i</sup> | $d_{M-C-O}$ <sup>j</sup> |
|------------------|------------------------------------|--------------------------|-------------------------|-----------------------------|-------------------------------|------------------------|--------------------------|----------------------------|--------------------------|--------------------------|
| Li <sup>+</sup>  | -17.98                             | 2.0772                   | 2.3855                  | 118.2828                    | 0.3141                        | 1.7987                 | 153.52                   | -1.4132                    | 1.8843                   | 129.581                  |
| Na <sup>+</sup>  | 29.28                              | 2.5624                   | 2.8208                  | 125.7543                    | 4.0304                        | 2.2437                 | 150.589                  | -2.5415                    | 2.3555                   | 132.696                  |
| K <sup>+</sup>   | 50.24                              | 3.1379                   | 3.1998                  | 128.6861                    | 19.4646                       | 2.6588                 | 151.482                  | -4.8346                    | 2.8741                   | 136.641                  |
| Rb <sup>+</sup>  | 38.21                              | > 9 Å                    |                         |                             |                               | 2.7712                 |                          |                            | > 7 Å                    |                          |
| Cs <sup>+</sup>  | 36.2                               | > 12 Å                   |                         |                             |                               | > 9 Å                  |                          |                            | > 12 Å                   |                          |
| Be <sup>2+</sup> | -202.44                            | 1.7448                   | 1.9731                  | 110.78                      | 0.0301                        | 1.4516                 | 153.146                  | -0.2048                    | 1.525                    | 133.899                  |
| Mg <sup>2+</sup> | 99.02                              | 2.206                    | 2.4125                  | 117.1357                    | 0.358                         | 1.9063                 | 149.018                  | -0.6995                    | 2.0053                   | 139.772                  |
| Ca <sup>2+</sup> | 211.04                             | 2.6871                   | 2.8361                  | 122.8807                    | 2.4881                        | 2.3312                 | 150.423                  | -1.7397                    | 2.5817                   | 146.008                  |
| Sr <sup>2+</sup> | 18.14                              | 2.6928                   | 3.1056                  | 130.717                     | -5.2090                       | 2.4024                 | 161.913                  | -1.3283                    | >>20 Å                   |                          |
| Ba <sup>2+</sup> | -58.92                             | >>20 Å                   |                         |                             |                               | 2.4378                 | 170.095                  | 1.7863                     | >>20 Å                   |                          |

<sup>a</sup>Complexation energy calculated by using CP model; <sup>b</sup>M-N binding distance against N-10 (expressed in Å); <sup>c</sup>M-arene distance expressed in Å; <sup>d</sup>M-N<sub>10</sub>-C<sub>a</sub> bond angle; <sup>e</sup>M-N<sub>10</sub>-C<sub>a</sub>-N<sub>1</sub> dihedral angle; <sup>f</sup>M-O binding distance against oxygen ketonic (expressed in Å); <sup>g</sup>M-C-O bond angle for ketonic moiety; <sup>h</sup>M-C-C-O dihedral angle for ketonic moiety; <sup>i</sup>M-O binding distance against methoxy (expressed in Å); <sup>j</sup>M-C-O bond angle for methoxy moiety.

### 3. References

- [1] Romero, A.H.; Salazar, J.; López, S.E. Synthesis of 2-(trifluoromethyl)benzo[b][1,8] naphthyridin-4(1H)-one derivatives using trifluoroacetimidoyl chlorides. *J. Fluor. Chem.* **2015**, *169*, 32-37.
- [2] Romero, A.H. A modified Procedure for the Synthesis of 2-chloroquinoline-3-carbaldehydes using phosphorus pentachloride. *Synth. Comm.* **2016**, *46*, 287-291.
- [3] Romero, A.H.; Cerecetto, H.E. A High CT-Fluorophore Featuring a Basic Moiety into D-A Chain as  $pK_a$ -probe. *J. Org. Chem.* **2022**, *87*, 7618-7634.
- [4] Kubin, R.F.; Fletcher, A.N. Fluorescence quantum yields of some rhodamine dyes. *J. Lumines.* **1982**, *27*, 455-462.
- [5] Würth, C.; Grabolle, M.; Pauli, J.; Spieles, M.; Resch-Genger, U.; *Nat. protocol.* **2013**, *8*, 1535.
- [6] Romero, A.H.; Romero, I.E.; Piro, O.E.; Echeverría, G.A.; Gotopo, L.A.; Moller, M.N.; Rodríguez, G.A.; Cabrera, G.J.; Castro, E.R.; López, S.E.; Cerecetto, H.E. A Photo-Induced Partially Aromatized Intramolecular Charge-Transfer. *J. Phys. Chem. B* **2021**, *125*, 9268-9285.
- [7] Goodpaster, J.V.; McGuffin, V.L. Rapid and Accurate Determination of Stern-Volmer Quenching Constants. *Appl. Spectrosc.* **1999**, *53*, 1000-1008.
- [8] Gehlen, M.H. The centenary of the Stern-Volmer equation of fluorescence quenching: From the single line plot to the SV quenching map. *J. Photochem. Photobiol. C: Photochem. Rev.* **2020**, *42*, 100338.
- [9] Frisch, M. J.; Trucks, G. W.; Schlegel, H. B.; Scuseria, G. E.; Robb, M. A.; Cheeseman, J. R.; Scalmani, G.; Barone, V.; Mennucci, B.; Petersson, G. A., et al. Gaussian 09; Revision A.1, Gaussian, Inc.: Wallingford, CT, 2009.
- [10] Yanai, T.; Tew, D.P.; Handy, N.C. A new hybrid exchange-correlation functional using the Coulomb-attenuating method (CAM-B3LYP). *Chem. Phys. Lett.* **2004**, *393*, 51-57.
- [11] Petersson, G.A.; Al-Laham, M.A. A Complete Basis Set Model Chemistry. II. Open-Shell Systems and the Total Energies of the First-Row Atoms. *J. Chem. Phys.* **1991**, *94*, 6081-6090.
- [12] Yang, Y.; Weaver, M.N.; Merz, Jr. K.M.; Assessment of the "6-31+G\*\* + LANL2DZ" Mixed Basis Set Coupled with Density Functional Theory Methods and the Effective Core Potential: Prediction of Heats of Formation and Ionization Potentials for First-Row-Transition-Metal Complexes. *J. Phys. Chem. A* **2009**, *113*, 9843-9851.
- [13] Chiodo, S.; Russo, N.; Sicilia, E. LANL2DZ basis sets recontracted in the framework of density functional theory. *J. Chem. Phys.* **2006**, *125*, 104107.
- [14] Acosta, M.; Gotopo, L.; Gamboa, N.; Rodríguez, J.; Henriques, G.; Cabrera, G.; Romero, A.H. Antimalarial Activity of Highly Coordinative Fused-Heterocycles Targeting  $\beta$ -Hematin Crystallization. *ACS Omega* **2022**, *7*, 7499-7514.
- [15] Boys, S.F.; Bernardi, F. The calculation of small molecular interactions by the differences of separate total energies. Some procedures with reduced errors. *Mol. Phys.* **1970**, *19*, 553-566.
- [16] Origin(Pro), Version 8.0. OriginLab Corporation, Northampton, MA, USA.
- [17] ChemDraw, Version 16.0, PerkinElmer Informatics.

## 5. Output of Theoretical Calculations for Interacting Model

### a. Interaction with a metal ion molecule

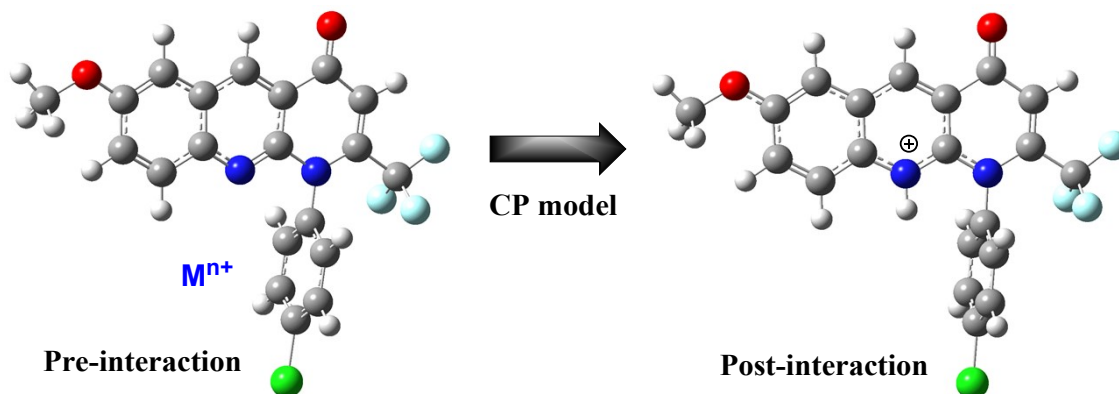

### i. Ligand 3k-Li

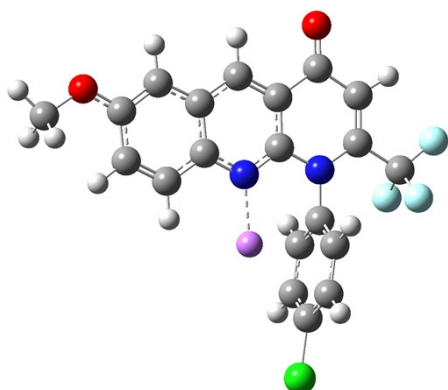

### Cartesian coordinates of optimized structure

Standard orientation:

| Center Number | Atomic Number | Atomic Type | Coordinates (Angstroms) |           |           |
|---------------|---------------|-------------|-------------------------|-----------|-----------|
|               |               |             | X                       | Y         | Z         |
| 1             | 6             | 0           | 4.276519                | 1.699764  | -0.000211 |
| 2             | 6             | 0           | 2.906039                | 1.624293  | -0.000140 |
| 3             | 6             | 0           | 2.243057                | 0.381448  | -0.000043 |
| 4             | 6             | 0           | 3.036096                | -0.797954 | 0.000014  |
| 5             | 6             | 0           | 4.440560                | -0.707955 | -0.000067 |
| 6             | 6             | 0           | 5.065156                | 0.521290  | -0.000191 |
| 7             | 6             | 0           | 2.350505                | -2.030018 | 0.000184  |
| 8             | 6             | 0           | 0.979935                | -2.069190 | 0.000239  |
| 9             | 6             | 0           | 0.270335                | -0.838925 | 0.000108  |
| 10            | 6             | 0           | -1.805394               | -2.085136 | 0.000051  |
| 11            | 6             | 0           | -1.184783               | -3.274672 | 0.000205  |
| 12            | 6             | 0           | 0.273105                | -3.373825 | 0.000449  |
| 13            | 1             | 0           | 2.328713                | 2.546425  | -0.000140 |

|    |    |   |           |           |           |
|----|----|---|-----------|-----------|-----------|
| 14 | 1  | 0 | 5.046540  | -1.606932 | -0.000026 |
| 15 | 1  | 0 | 2.885208  | -2.975569 | 0.000294  |
| 16 | 1  | 0 | -1.759336 | -4.190429 | 0.000131  |
| 17 | 6  | 0 | -1.798508 | 0.401327  | 0.000144  |
| 18 | 6  | 0 | -2.053244 | 1.050934  | 1.209512  |
| 19 | 6  | 0 | -2.053674 | 1.050806  | -1.209210 |
| 20 | 6  | 0 | -2.531905 | 2.359764  | 1.213261  |
| 21 | 1  | 0 | -1.856365 | 0.537577  | 2.144083  |
| 22 | 6  | 0 | -2.532340 | 2.359635  | -1.212929 |
| 23 | 1  | 0 | -1.857146 | 0.537325  | -2.143784 |
| 24 | 6  | 0 | -2.766309 | 3.013619  | 0.000173  |
| 25 | 1  | 0 | -2.729444 | 2.871019  | 2.148526  |
| 26 | 1  | 0 | -2.730212 | 2.870789  | -2.148179 |
| 27 | 6  | 0 | -3.317066 | -2.015553 | -0.000333 |
| 28 | 7  | 0 | -1.127551 | -0.864384 | 0.000099  |
| 29 | 9  | 0 | -3.854394 | -3.227328 | -0.000241 |
| 30 | 9  | 0 | -3.763498 | -1.357370 | 1.082373  |
| 31 | 9  | 0 | -3.762878 | -1.357807 | -1.083603 |
| 32 | 7  | 0 | 0.871141  | 0.342024  | -0.000006 |
| 33 | 8  | 0 | 0.874668  | -4.431308 | 0.000754  |
| 34 | 1  | 0 | 4.752619  | 2.672084  | -0.000270 |
| 35 | 6  | 0 | 7.110934  | 1.753029  | -0.000202 |
| 36 | 1  | 0 | 6.886452  | 2.341083  | -0.896449 |
| 37 | 1  | 0 | 6.886300  | 2.341097  | 0.895997  |
| 38 | 1  | 0 | 8.167789  | 1.492305  | -0.000111 |
| 39 | 8  | 0 | 6.408847  | 0.519639  | -0.000249 |
| 40 | 17 | 0 | -3.348849 | 4.637166  | 0.000187  |
| 41 | 3  | 0 | -0.197041 | 2.009247  | -0.000259 |

-----  
Rotational constants (GHZ): 0.2058485 0.1101392 0.0746133

Integral accuracy reduced to 1.0D-05 until final iterations.

Initial convergence to 1.0D-05 achieved. Increase integral accuracy.

SCF Done: E(RCAM-B3LYP) = -1788.43364730 A.U. after 8 cycles

NFock= 8 Conv=0.74D-08 -V/T= 2.0049

Calling FoFJK, ICntrl= 2127 FMM=F ISym2X=0 I1Cent= 0 IOpClX= 0 NMat=1  
NMatS=1 NMatT=0.

\*\*\*\*\* Axes restored to original set \*\*\*\*\*

Cartesian Forces: Max 0.018313722 RMS 0.005039795

CPIOFr: IOpCl= 0 IRwI=-1 IRwCP= 731 ICalc= 4 LCPTot= 338287 Len1MO=  
874561 IndFrg= 4711092

CPIOFr: IOpCl= 0 IRwI=-2 IRwCP= 731 ICalc= 0 LCPTot= 338287 Len1MO=  
874561 IndFrg= 1212848

Counterpoise corrected energy = -1795.793861102566

BSSE energy = 0.004842665874

sum of monomers = -1795.697939581149

complexation energy = -63.23 kcal/mole (raw)

**complexation energy = -60.19 kcal/mole (corrected)**



ii. 3k-Be

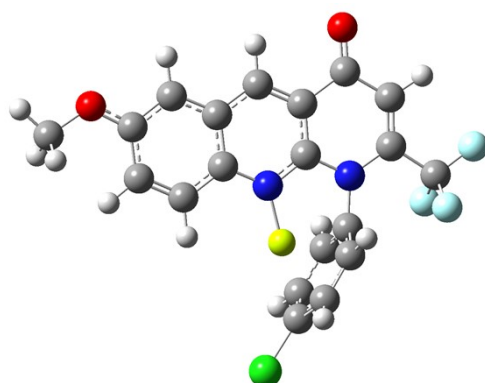

Cartesian coordinates of optimized structure

| Center Number | Atomic Number | Atomic Type | Coordinates (Angstroms) |           |           |
|---------------|---------------|-------------|-------------------------|-----------|-----------|
|               |               |             | X                       | Y         | Z         |
| 1             | 6             | 0           | 4.263150                | 0.730014  | 0.000169  |
| 2             | 6             | 0           | 2.905362                | 0.966679  | 0.000051  |
| 3             | 6             | 0           | 2.001064                | -0.097082 | -0.000035 |
| 4             | 6             | 0           | 2.497928                | -1.430438 | -0.000034 |
| 5             | 6             | 0           | 3.882777                | -1.656652 | 0.000086  |
| 6             | 6             | 0           | 4.773263                | -0.593173 | 0.000207  |
| 7             | 6             | 0           | 1.559964                | -2.485708 | -0.000201 |
| 8             | 6             | 0           | 0.203190                | -2.240946 | -0.000308 |
| 9             | 6             | 0           | -0.227295               | -0.907161 | -0.000265 |
| 10            | 6             | 0           | -2.545222               | -1.655784 | -0.000112 |
| 11            | 6             | 0           | -2.199139               | -2.945166 | -0.000203 |
| 12            | 6             | 0           | -0.784385               | -3.360992 | -0.000435 |
| 13            | 1             | 0           | 2.547829                | 1.995660  | 0.000024  |
| 14            | 1             | 0           | 4.274037                | -2.667910 | 0.000088  |
| 15            | 1             | 0           | 1.885130                | -3.523609 | -0.000249 |
| 16            | 1             | 0           | -2.959778               | -3.716676 | -0.000044 |
| 17            | 6             | 0           | -1.863571               | 0.776831  | -0.000284 |
| 18            | 6             | 0           | -1.732593               | 1.475923  | 1.215948  |
| 19            | 6             | 0           | -1.732601               | 1.476022  | -1.216464 |
| 20            | 6             | 0           | -1.311600               | 2.812820  | 1.220283  |
| 21            | 1             | 0           | -1.792308               | 0.924547  | 2.149819  |
| 22            | 6             | 0           | -1.311632               | 2.812938  | -1.220691 |
| 23            | 1             | 0           | -1.792287               | 0.924725  | -2.150384 |
| 24            | 6             | 0           | -1.078710               | 3.491513  | -0.000176 |
| 25            | 1             | 0           | -1.107709               | 3.318987  | 2.159630  |
| 26            | 1             | 0           | -1.107753               | 3.319177  | -2.160003 |
| 27            | 6             | 0           | -3.969466               | -1.162815 | 0.000471  |
| 28            | 7             | 0           | -1.588174               | -0.620332 | -0.000325 |
| 29            | 9             | 0           | -4.834822               | -2.149206 | 0.000465  |
| 30            | 9             | 0           | -4.169407               | -0.382376 | 1.081483  |
| 31            | 9             | 0           | -4.170146               | -0.381696 | -1.079876 |
| 32            | 7             | 0           | 0.629970                | 0.142158  | -0.000128 |
| 33            | 8             | 0           | -0.427064               | -4.515993 | -0.000880 |

|    |    |   |           |           |           |
|----|----|---|-----------|-----------|-----------|
| 34 | 1  | 0 | 4.944518  | 1.571630  | 0.000231  |
| 35 | 6  | 0 | 7.053913  | 0.135463  | 0.000441  |
| 36 | 1  | 0 | 6.973992  | 0.753175  | -0.898848 |
| 37 | 1  | 0 | 6.973777  | 0.753186  | 0.899704  |
| 38 | 1  | 0 | 8.012065  | -0.379244 | 0.000558  |
| 39 | 8  | 0 | 6.066109  | -0.897109 | 0.000331  |
| 40 | 17 | 0 | -0.498896 | 5.086726  | -0.000098 |
| 41 | 4  | 0 | -0.128055 | 1.567456  | -0.000156 |

-----  
 Rotational constants (GHZ): 0.2042204 0.1221620 0.0797168

Integral accuracy reduced to 1.0D-05 until final iterations.

Initial convergence to 1.0D-05 achieved. Increase integral accuracy.

SCF Done: E(RCAM-B3LYP) = -1788.40873681 A.U. after 8 cycles

NFock= 8 Conv=0.69D-08 -V/T= 2.0050

Calling FoFJK, ICntrl= 2127 FMM=F ISym2X=0 I1Cent= 0 IOpClX= 0 NMat=1  
 NMatS=1 NMatT=0.

\*\*\*\*\* Axes restored to original set \*\*\*\*\*

Cartesian Forces: Max 0.049195176 RMS 0.012097807

CPIOFr: IOpCl= 0 IRwI=-1 IRwCP= 731 ICalc= 4 LCPTot= 338287 Len1MO=  
 874567 IndFrg= 4711122

CPIOFr: IOpCl= 0 IRwI=-2 IRwCP= 731 ICalc= 0 LCPTot= 338287 Len1MO=  
 874567 IndFrg= 1212854

Counterpoise corrected energy = -1802.576290266966

BSSE energy = 0.005472839105

sum of monomers = -1802.039018422297

complexation energy = -340.58 kcal/mole (raw)

**complexation energy = -337.14 kcal/mole (corrected)**

### iii. 3k-Na

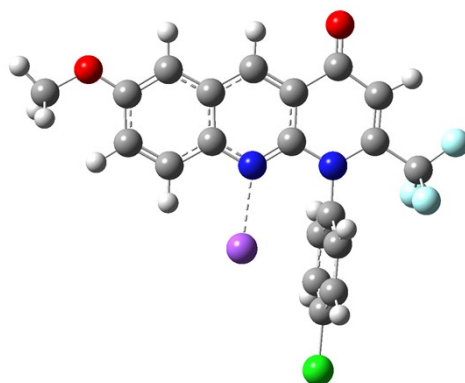

### Cartesian coordinates of optimized structure

-----

| Center<br>Number | Atomic<br>Number | Atomic<br>Type | Coordinates (Angstroms) |          |           |
|------------------|------------------|----------------|-------------------------|----------|-----------|
|                  |                  |                | X                       | Y        | Z         |
| 1                | 6                | 0              | 4.329692                | 1.763460 | -0.031963 |
| 2                | 6                | 0              | 2.961325                | 1.653329 | -0.029774 |
| 3                | 6                | 0              | 2.317495                | 0.397681 | -0.003412 |

-----

|    |    |   |           |           |           |
|----|----|---|-----------|-----------|-----------|
| 4  | 6  | 0 | 3.146378  | -0.757739 | 0.010904  |
| 5  | 6  | 0 | 4.548411  | -0.635394 | 0.010604  |
| 6  | 6  | 0 | 5.146348  | 0.605986  | -0.007812 |
| 7  | 6  | 0 | 2.495112  | -2.007150 | 0.020322  |
| 8  | 6  | 0 | 1.128061  | -2.080696 | 0.012571  |
| 9  | 6  | 0 | 0.381038  | -0.867726 | 0.004886  |
| 10 | 6  | 0 | -1.648053 | -2.191484 | -0.008506 |
| 11 | 6  | 0 | -0.987015 | -3.360068 | -0.001673 |
| 12 | 6  | 0 | 0.469609  | -3.409142 | 0.014788  |
| 13 | 1  | 0 | 2.377191  | 2.570139  | -0.067289 |
| 14 | 1  | 0 | 5.173375  | -1.521307 | 0.022720  |
| 15 | 1  | 0 | 3.053548  | -2.938671 | 0.030311  |
| 16 | 1  | 0 | -1.529358 | -4.294744 | -0.010276 |
| 17 | 6  | 0 | -1.770397 | 0.277667  | -0.007831 |
| 18 | 6  | 0 | -2.195775 | 0.841545  | 1.193673  |
| 19 | 6  | 0 | -2.048243 | 0.915453  | -1.216070 |
| 20 | 6  | 0 | -2.880107 | 2.055026  | 1.193640  |
| 21 | 1  | 0 | -1.999143 | 0.325610  | 2.126947  |
| 22 | 6  | 0 | -2.729121 | 2.129013  | -1.225946 |
| 23 | 1  | 0 | -1.733532 | 0.457321  | -2.147227 |
| 24 | 6  | 0 | -3.141114 | 2.696195  | -0.018244 |
| 25 | 1  | 0 | -3.229849 | 2.491567  | 2.122356  |
| 26 | 1  | 0 | -2.961799 | 2.624086  | -2.161896 |
| 27 | 6  | 0 | -3.164388 | -2.202357 | -0.026757 |
| 28 | 7  | 0 | -1.017888 | -0.944058 | 0.000045  |
| 29 | 9  | 0 | -3.631870 | -3.443907 | -0.072229 |
| 30 | 9  | 0 | -3.664599 | -1.613634 | 1.072121  |
| 31 | 9  | 0 | -3.639497 | -1.541584 | -1.093920 |
| 32 | 7  | 0 | 0.947696  | 0.326377  | 0.004641  |
| 33 | 8  | 0 | 1.109057  | -4.445121 | 0.027255  |
| 34 | 1  | 0 | 4.781441  | 2.747071  | -0.056736 |
| 35 | 6  | 0 | 7.161882  | 1.885027  | -0.029852 |
| 36 | 1  | 0 | 6.925977  | 2.449071  | -0.938730 |
| 37 | 1  | 0 | 6.920371  | 2.486632  | 0.853121  |
| 38 | 1  | 0 | 8.225056  | 1.651268  | -0.021658 |
| 39 | 8  | 0 | 6.490823  | 0.635707  | -0.005738 |
| 40 | 17 | 0 | -3.986880 | 4.206451  | -0.025092 |
| 41 | 11 | 0 | -0.112469 | 2.489249  | 0.199541  |

-----  
Rotational constants (GHZ): 0.2047844 0.1045882 0.0719047

Integral accuracy reduced to 1.0D-05 until final iterations.

Initial convergence to 1.0D-05 achieved. Increase integral accuracy.

SCF Done: E(RCAM-B3LYP) = -1788.43444520 A.U. after 8 cycles

NFock= 8 Conv=0.64D-08 -V/T= 2.0049

Calling FoFJK, ICntrl= 2127 FMM=F ISym2X=0 I1Cent= 0 IOPClX= 0 NMat=1  
NMatS=1 NMatT=0.

\*\*\*\*\* Axes restored to original set \*\*\*\*\*

Cartesian Forces: Max 0.013079569 RMS 0.004089751

CPIOFr: IOPCl= 0 IRwI=-1 IRwCP= 731 ICalc= 4 LCPTot= 336893 Len1MO=

870766 IndFrg= 4690723  
 CPIOFr: IOpCl= 0 IRwI=-2 IRwCP= 731 ICalc= 0 LCPTot= 336893 Len1MO=  
 870766 IndFrg= 1207659  
 Counterpoise corrected energy = -1788.489659924476  
 BSSE energy = 0.004315386986  
 sum of monomers = -1788.434445197841  
 complexation energy = -37.36 kcal/mole (raw)  
**complexation energy = -34.65 kcal/mole (corrected)**

**iv. 3k-Mg**

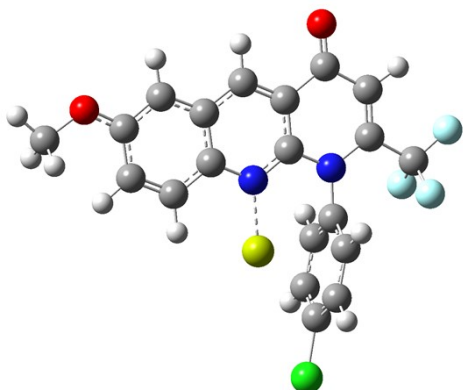

**Cartesian coordinates of optimized structure**

| Center Number | Atomic Number | Atomic Type | Coordinates (Angstroms) |           |           |
|---------------|---------------|-------------|-------------------------|-----------|-----------|
|               |               |             | X                       | Y         | Z         |
| 1             | 6             | 0           | 4.283554                | 1.501285  | -0.000183 |
| 2             | 6             | 0           | 2.908242                | 1.448542  | -0.000167 |
| 3             | 6             | 0           | 2.222884                | 0.228078  | -0.000080 |
| 4             | 6             | 0           | 2.979820                | -0.971485 | -0.000001 |
| 5             | 6             | 0           | 4.381696                | -0.915280 | -0.000022 |
| 6             | 6             | 0           | 5.043630                | 0.303511  | -0.000123 |
| 7             | 6             | 0           | 2.253932                | -2.184754 | 0.000101  |
| 8             | 6             | 0           | 0.880407                | -2.193698 | 0.000100  |
| 9             | 6             | 0           | 0.191437                | -0.958492 | 0.000006  |
| 10            | 6             | 0           | -1.917641               | -2.171233 | 0.000017  |
| 11            | 6             | 0           | -1.319917               | -3.366082 | 0.000114  |
| 12            | 6             | 0           | 0.143022                | -3.489692 | 0.000226  |
| 13            | 1             | 0           | 2.358638                | 2.401146  | -0.000249 |
| 14            | 1             | 0           | 4.967947                | -1.827582 | 0.000040  |
| 15            | 1             | 0           | 2.763305                | -3.145447 | 0.000188  |
| 16            | 1             | 0           | -1.910625               | -4.273535 | 0.000111  |
| 17            | 6             | 0           | -1.833800               | 0.324009  | 0.000022  |
| 18            | 6             | 0           | -2.035061               | 1.000252  | 1.212768  |
| 19            | 6             | 0           | -2.035147               | 1.000281  | -1.212668 |
| 20            | 6             | 0           | -2.351002               | 2.365260  | 1.218906  |
| 21            | 1             | 0           | -1.901531               | 0.468301  | 2.149906  |
| 22            | 6             | 0           | -2.351094               | 2.365313  | -1.218745 |
| 23            | 1             | 0           | -1.901675               | 0.468374  | -2.149839 |

|    |    |   |           |           |           |
|----|----|---|-----------|-----------|-----------|
| 24 | 6  | 0 | -2.515199 | 3.058119  | 0.000089  |
| 25 | 1  | 0 | -2.508585 | 2.888362  | 2.157568  |
| 26 | 1  | 0 | -2.508749 | 2.888410  | -2.157396 |
| 27 | 6  | 0 | -3.422503 | -2.031309 | -0.000156 |
| 28 | 7  | 0 | -1.200100 | -0.954104 | -0.000012 |
| 29 | 9  | 0 | -4.018211 | -3.204548 | -0.000183 |
| 30 | 9  | 0 | -3.818333 | -1.335034 | 1.082012  |
| 31 | 9  | 0 | -3.818064 | -1.335113 | -1.082479 |
| 32 | 7  | 0 | 0.838492  | 0.214998  | -0.000060 |
| 33 | 8  | 0 | 0.727666  | -4.549607 | 0.000392  |
| 34 | 1  | 0 | 4.783371  | 2.461725  | -0.000238 |
| 35 | 6  | 0 | 7.133076  | 1.471604  | 0.000046  |
| 36 | 1  | 0 | 6.931747  | 2.061314  | -0.899354 |
| 37 | 1  | 0 | 6.931335  | 2.061374  | 0.899313  |
| 38 | 1  | 0 | 8.175240  | 1.160159  | 0.000293  |
| 39 | 8  | 0 | 6.372753  | 0.263218  | -0.000081 |
| 40 | 17 | 0 | -2.939518 | 4.712950  | 0.000161  |
| 41 | 12 | 0 | -0.119271 | 1.991582  | -0.000059 |

-----  
Rotational constants (GHZ): 0.1963547 0.1125281 0.0743929

Integral accuracy reduced to 1.0D-05 until final iterations.

Initial convergence to 1.0D-05 achieved. Increase integral accuracy.

SCF Done: E(RCAM-B3LYP) = -1788.42488619 A.U. after 8 cycles

NFock= 8 Conv=0.66D-08 -V/T= 2.0050

Calling FoFJK, ICntrl= 2127 FMM=F ISym2X=0 IICent= 0 IOPClX= 0 NMat=1  
NMatS=1 NMatT=0.

\*\*\*\*\* Axes restored to original set \*\*\*\*\*

Cartesian Forces: Max 0.038974000 RMS 0.010071287

CPIOFr: IOPCl= 0 IRwI=-1 IRwCP= 731 ICalc= 4 LCPTot= 336893 Len1MO=  
870766 IndFrg= 4690723

CPIOFr: IOPCl= 0 IRwI=-2 IRwCP= 731 ICalc= 0 LCPTot= 336893 Len1MO=  
870766 IndFrg= 1207659

Counterpoise corrected energy = -1788.714420709823

BSSE energy = 0.005122031727

sum of monomers = -1788.424886194950

complexation energy = -184.90 kcal/mole (raw)

**complexation energy = -181.69 kcal/mole (corrected)**

v. 3k-K

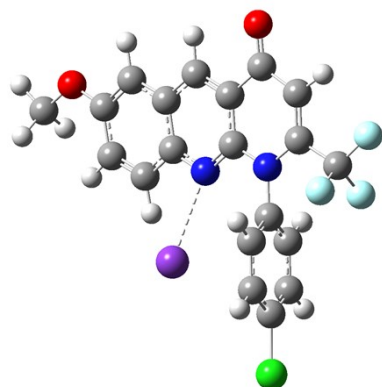

Cartesian coordinates of optimized structure

| Center Number | Atomic Number | Atomic Type | Coordinates (Angstroms) |           |           |
|---------------|---------------|-------------|-------------------------|-----------|-----------|
|               |               |             | X                       | Y         | Z         |
| 1             | 6             | 0           | -4.331959               | -1.636937 | -0.283825 |
| 2             | 6             | 0           | -2.962925               | -1.527083 | -0.279855 |
| 3             | 6             | 0           | -2.319440               | -0.282325 | -0.096533 |
| 4             | 6             | 0           | -3.149051               | 0.864537  | 0.047038  |
| 5             | 6             | 0           | -4.551093               | 0.738920  | 0.053517  |
| 6             | 6             | 0           | -5.147947               | -0.493598 | -0.098624 |
| 7             | 6             | 0           | -2.497069               | 2.109339  | 0.155628  |
| 8             | 6             | 0           | -1.130833               | 2.183786  | 0.111574  |
| 9             | 6             | 0           | -0.387419               | 0.972705  | -0.004641 |
| 10            | 6             | 0           | 1.641581                | 2.291472  | -0.027700 |
| 11            | 6             | 0           | 0.983319                | 3.458538  | 0.074422  |
| 12            | 6             | 0           | -0.468050               | 3.506985  | 0.190365  |
| 13            | 1             | 0           | -2.370681               | -2.412663 | -0.493357 |
| 14            | 1             | 0           | -5.177459               | 1.616657  | 0.167635  |
| 15            | 1             | 0           | -3.053914               | 3.035880  | 0.260675  |
| 16            | 1             | 0           | 1.524903                | 4.393503  | 0.061327  |
| 17            | 6             | 0           | 1.764291                | -0.178707 | -0.070291 |
| 18            | 6             | 0           | 2.388974                | -0.644936 | 1.083065  |
| 19            | 6             | 0           | 1.863926                | -0.899976 | -1.258307 |
| 20            | 6             | 0           | 3.110891                | -1.836023 | 1.056176  |
| 21            | 1             | 0           | 2.332688                | -0.064224 | 1.996952  |
| 22            | 6             | 0           | 2.570896                | -2.094801 | -1.292018 |
| 23            | 1             | 0           | 1.388894                | -0.519538 | -2.155381 |
| 24            | 6             | 0           | 3.190918                | -2.558740 | -0.131440 |
| 25            | 1             | 0           | 3.625366                | -2.190484 | 1.942440  |
| 26            | 1             | 0           | 2.664957                | -2.655017 | -2.215315 |
| 27            | 6             | 0           | 3.153179                | 2.317164  | -0.163736 |
| 28            | 7             | 0           | 1.012819                | 1.044573  | -0.032289 |
| 29            | 9             | 0           | 3.595199                | 3.561107  | -0.314460 |
| 30            | 9             | 0           | 3.750446                | 1.803631  | 0.925232  |
| 31            | 9             | 0           | 3.555602                | 1.603106  | -1.224282 |
| 32            | 7             | 0           | -0.952015               | -0.216944 | -0.077595 |

|    |    |   |           |           |           |
|----|----|---|-----------|-----------|-----------|
| 33 | 8  | 0 | -1.100827 | 4.539071  | 0.324983  |
| 34 | 1  | 0 | -4.785531 | -2.606431 | -0.447836 |
| 35 | 6  | 0 | -7.164118 | -1.760834 | -0.266139 |
| 36 | 1  | 0 | -6.942552 | -2.190777 | -1.248996 |
| 37 | 1  | 0 | -6.908766 | -2.481349 | 0.518736  |
| 38 | 1  | 0 | -8.227311 | -1.533897 | -0.208320 |
| 39 | 8  | 0 | -6.493538 | -0.526474 | -0.076284 |
| 40 | 17 | 0 | 4.066756  | -4.056291 | -0.167653 |
| 41 | 19 | 0 | -0.017674 | -2.695600 | 0.851614  |

-----  
Rotational constants (GHZ): 0.1912934 0.1031963 0.0701724

Integral accuracy reduced to 1.0D-05 until final iterations.

Initial convergence to 1.0D-05 achieved. Increase integral accuracy.

SCF Done: E(RCAM-B3LYP) = -1788.43401200 A.U. after 8 cycles

NFock= 8 Conv=0.72D-08 -V/T= 2.0049

Calling FoFJK, ICntrl= 2127 FMM=F ISym2X=0 IICent= 0 IOpCIX= 0 NMat=1  
NMatS=1 NMatT=0.

\*\*\*\*\* Axes restored to original set \*\*\*\*\*

Cartesian Forces: Max 0.011418490 RMS 0.003413078

CPIOFr: IOpCl= 0 IRwI=-1 IRwCP= 731 ICalc= 4 LCPTot= 342487 Len1MO=  
885786 IndFrg= 4771417

CPIOFr: IOpCl= 0 IRwI=-2 IRwCP= 731 ICalc= 0 LCPTot= 342487 Len1MO=  
885786 IndFrg= 1228273

Counterpoise corrected energy = -1816.405888449023

BSSE energy = 0.004665835044

sum of monomers = -1816.370737354451

complexation energy = -24.99 kcal/mole (raw)

**complexation energy = -22.06 kcal/mole (corrected)**

### vi. 3k-Ca

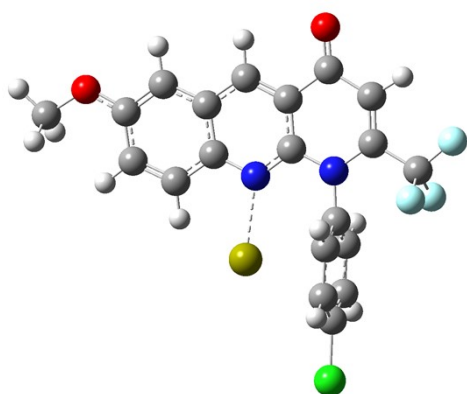

### Cartesian coordinates of optimized structure

-----

| Center<br>Number | Atomic<br>Number | Atomic<br>Type | Coordinates (Angstroms) |           |           |
|------------------|------------------|----------------|-------------------------|-----------|-----------|
|                  |                  |                | X                       | Y         | Z         |
| 1                | 6                | 0              | -4.323860               | -1.606925 | -0.146364 |
| 2                | 6                | 0              | -2.949717               | -1.502350 | -0.169659 |

-----



|    |    |   |           |           |           |
|----|----|---|-----------|-----------|-----------|
| 3  | 6  | 0 | -2.293230 | -0.262032 | -0.063290 |
| 4  | 6  | 0 | -3.106415 | 0.897358  | 0.033758  |
| 5  | 6  | 0 | -4.504628 | 0.788206  | 0.063155  |
| 6  | 6  | 0 | -5.125621 | -0.448525 | -0.010768 |
| 7  | 6  | 0 | -2.436300 | 2.142052  | 0.078041  |
| 8  | 6  | 0 | -1.069610 | 2.207959  | 0.034261  |
| 9  | 6  | 0 | -0.328597 | 0.997326  | -0.023578 |
| 10 | 6  | 0 | 1.717534  | 2.311019  | -0.022140 |
| 11 | 6  | 0 | 1.066454  | 3.478597  | 0.019356  |
| 12 | 6  | 0 | -0.395726 | 3.535430  | 0.066861  |
| 13 | 1  | 0 | -2.401146 | -2.430517 | -0.381429 |
| 14 | 1  | 0 | -5.121097 | 1.677410  | 0.138239  |
| 15 | 1  | 0 | -2.986707 | 3.077447  | 0.140264  |
| 16 | 1  | 0 | 1.615333  | 4.411207  | 0.018025  |
| 17 | 6  | 0 | 1.787973  | -0.171755 | -0.031267 |
| 18 | 6  | 0 | 2.197159  | -0.742657 | 1.178597  |
| 19 | 6  | 0 | 2.033522  | -0.843407 | -1.234020 |
| 20 | 6  | 0 | 2.796278  | -2.006344 | 1.196355  |
| 21 | 1  | 0 | 2.057334  | -0.194010 | 2.104954  |
| 22 | 6  | 0 | 2.627110  | -2.106593 | -1.227751 |
| 23 | 1  | 0 | 1.757392  | -0.374798 | -2.173375 |
| 24 | 6  | 0 | 3.011849  | -2.691981 | -0.010044 |
| 25 | 1  | 0 | 3.149661  | -2.435064 | 2.129296  |
| 26 | 1  | 0 | 2.845524  | -2.616626 | -2.160931 |
| 27 | 6  | 0 | 3.231103  | 2.276664  | -0.070854 |
| 28 | 7  | 0 | 1.061930  | 1.060096  | -0.032084 |
| 29 | 9  | 0 | 3.735042  | 3.494474  | -0.121647 |
| 30 | 9  | 0 | 3.721714  | 1.653764  | 1.016210  |
| 31 | 9  | 0 | 3.648343  | 1.589305  | -1.147765 |
| 32 | 7  | 0 | -0.911955 | -0.199771 | -0.052528 |
| 33 | 8  | 0 | -1.029282 | 4.566690  | 0.127066  |
| 34 | 1  | 0 | -4.789004 | -2.579048 | -0.251531 |
| 35 | 6  | 0 | -7.171229 | -1.687499 | -0.065351 |
| 36 | 1  | 0 | -6.983692 | -2.175881 | -1.026658 |
| 37 | 1  | 0 | -6.914592 | -2.357823 | 0.760968  |
| 38 | 1  | 0 | -8.223706 | -1.421000 | 0.002333  |
| 39 | 8  | 0 | -6.456816 | -0.457293 | 0.032030  |
| 40 | 17 | 0 | 3.763773  | -4.238433 | 0.001191  |
| 41 | 20 | 0 | 0.015966  | -2.372526 | 0.235307  |

-----  
Rotational constants (GHZ): 0.1935916 0.1061998 0.0712686

Integral accuracy reduced to 1.0D-05 until final iterations.

Initial convergence to 1.0D-05 achieved. Increase integral accuracy.

SCF Done: E(RCAM-B3LYP) = -1788.42846042 A.U. after 8 cycles

NFock= 8 Conv=0.67D-08 -V/T= 2.0049

Calling FoFJK, ICtrl= 2127 FMM=F ISym2X=0 IICent= 0 IOPCIX= 0 NMat=1  
NMatS=1 NMatT=0.

\*\*\*\*\* Axes restored to original set \*\*\*\*\*

Cartesian Forces: Max 0.025491334 RMS 0.008238413

CPIOFr: IOpCl= 0 IRwI=-1 IRwCP= 731 ICalc= 4 LCPTot= 342487 Len1MO=  
 885786 IndFrg= 4771417  
 CPIOFr: IOpCl= 0 IRwI=-2 IRwCP= 731 ICalc= 0 LCPTot= 342487 Len1MO=  
 885786 IndFrg= 1228273  
 Counterpoise corrected energy = -1824.449063557017  
 BSSE energy = 0.005412240594  
 sum of monomers = -1824.271929748913  
 complexation energy = -114.55 kcal/mole (raw)  
**complexation energy = -111.15 kcal/mole (corrected)**

**vii. 3k-Rb**

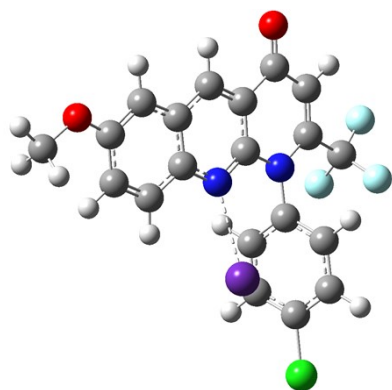

**Cartesian coordinates of optimized structure**

| Center<br>Number | Atomic<br>Number | Atomic<br>Type | Coordinates (Angstroms) |           |           |
|------------------|------------------|----------------|-------------------------|-----------|-----------|
|                  |                  |                | X                       | Y         | Z         |
| 1                | 6                | 0              | -4.326907               | -1.348076 | -0.528929 |
| 2                | 6                | 0              | -2.957133               | -1.249218 | -0.514336 |
| 3                | 6                | 0              | -2.306523               | -0.028275 | -0.223888 |
| 4                | 6                | 0              | -3.127419               | 1.109285  | 0.014038  |
| 5                | 6                | 0              | -4.530609               | 0.992415  | 0.011122  |
| 6                | 6                | 0              | -5.134866               | -0.218808 | -0.245136 |
| 7                | 6                | 0              | -2.465220               | 2.336457  | 0.219538  |
| 8                | 6                | 0              | -1.098474               | 2.403513  | 0.172688  |
| 9                | 6                | 0              | -0.365864               | 1.198590  | -0.041210 |
| 10               | 6                | 0              | 1.672159                | 2.499740  | -0.001072 |
| 11               | 6                | 0              | 1.024313                | 3.661438  | 0.194083  |
| 12               | 6                | 0              | -0.423330               | 3.711051  | 0.346229  |
| 13               | 1                | 0              | -2.363044               | -2.109817 | -0.808107 |
| 14               | 1                | 0              | -5.151742               | 1.861489  | 0.197518  |
| 15               | 1                | 0              | -3.013973               | 3.256118  | 0.400245  |
| 16               | 1                | 0              | 1.571993                | 4.592297  | 0.227570  |
| 17               | 6                | 0              | 1.776993                | 0.034016  | -0.180775 |
| 18               | 6                | 0              | 2.451743                | -0.465399 | 0.928928  |
| 19               | 6                | 0              | 1.817956                | -0.654934 | -1.390818 |
| 20               | 6                | 0              | 3.170839                | -1.654310 | 0.834871  |
| 21               | 1                | 0              | 2.440621                | 0.089720  | 1.860109  |
| 22               | 6                | 0              | 2.518689                | -1.848854 | -1.490005 |

|    |    |   |           |           |           |
|----|----|---|-----------|-----------|-----------|
| 23 | 1  | 0 | 1.301210  | -0.250300 | -2.253263 |
| 24 | 6  | 0 | 3.191192  | -2.344124 | -0.373294 |
| 25 | 1  | 0 | 3.726997  | -2.032754 | 1.685360  |
| 26 | 1  | 0 | 2.565985  | -2.384929 | -2.430991 |
| 27 | 6  | 0 | 3.180129  | 2.531305  | -0.177137 |
| 28 | 7  | 0 | 1.035557  | 1.259873  | -0.073625 |
| 29 | 9  | 0 | 3.616972  | 3.781254  | -0.295509 |
| 30 | 9  | 0 | 3.808864  | 1.982612  | 0.876630  |
| 31 | 9  | 0 | 3.554239  | 1.856755  | -1.272455 |
| 32 | 7  | 0 | -0.940164 | 0.023497  | -0.200198 |
| 33 | 8  | 0 | -1.044566 | 4.733815  | 0.575321  |
| 34 | 1  | 0 | -4.788170 | -2.295107 | -0.780177 |
| 35 | 6  | 0 | -7.159796 | -1.449417 | -0.535901 |
| 36 | 1  | 0 | -6.935439 | -1.785013 | -1.554238 |
| 37 | 1  | 0 | -6.914716 | -2.244417 | 0.177202  |
| 38 | 1  | 0 | -8.221730 | -1.220985 | -0.462109 |
| 39 | 8  | 0 | -6.481489 | -0.244643 | -0.224818 |
| 40 | 17 | 0 | 4.057681  | -3.845123 | -0.489681 |
| 41 | 37 | 0 | -0.106102 | -2.672707 | 0.953682  |

-----  
Rotational constants (GHZ): 0.1631683 0.1015622 0.0666449

Integral accuracy reduced to 1.0D-05 until final iterations.

Initial convergence to 1.0D-05 achieved. Increase integral accuracy.

SCF Done: E(RCAM-B3LYP) = -1788.43385224 A.U. after 8 cycles

NFock= 8 Conv=0.50D-08 -V/T= 2.0049

Calling FoFJK, ICntrl= 2127 FMM=F ISym2X=0 IICent= 0 IOpClX= 0 NMat=1  
NMatS=1 NMatT=0.

\*\*\*\*\* Axes restored to original set \*\*\*\*\*

Cartesian Forces: Max 0.010574819 RMS 0.003106769

CPIOFr: IOpCl= 0 IRwI=-1 IRwCP= 731 ICalc= 4 LCPTot= 342487 Len1MO=  
885792 IndFrg= 4771447

CPIOFr: IOpCl= 0 IRwI=-2 IRwCP= 731 ICalc= 0 LCPTot= 342487 Len1MO=  
885792 IndFrg= 1228279

Counterpoise corrected energy = -1812.134800760948

BSSE energy = 0.003969212661

sum of monomers = -1812.107283354044

complexation energy = -19.76 kcal/mole (raw)

**complexation energy = -17.27 kcal/mole (corrected)**

viii. 3k-Sr

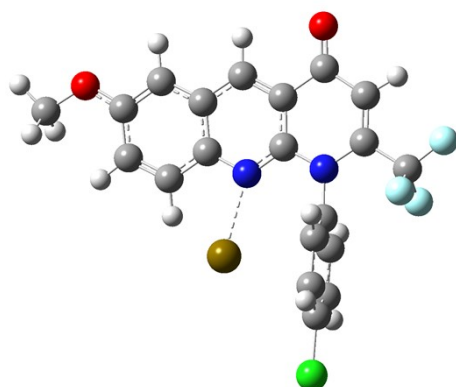

Cartesian coordinates of optimized structure

| Center Number | Atomic Number | Atomic Type | Coordinates (Angstroms) |           |           |
|---------------|---------------|-------------|-------------------------|-----------|-----------|
|               |               |             | X                       | Y         | Z         |
| 1             | 6             | 0           | -4.338091               | -1.403714 | -0.314793 |
| 2             | 6             | 0           | -2.961742               | -1.304878 | -0.335605 |
| 3             | 6             | 0           | -2.300277               | -0.075316 | -0.133473 |
| 4             | 6             | 0           | -3.113898               | 1.074881  | 0.044666  |
| 5             | 6             | 0           | -4.512135               | 0.965220  | 0.080725  |
| 6             | 6             | 0           | -5.136556               | -0.261753 | -0.073657 |
| 7             | 6             | 0           | -2.445933               | 2.317224  | 0.145217  |
| 8             | 6             | 0           | -1.081553               | 2.387183  | 0.076233  |
| 9             | 6             | 0           | -0.340208               | 1.179226  | -0.043236 |
| 10            | 6             | 0           | 1.700877                | 2.499051  | -0.030328 |
| 11            | 6             | 0           | 1.048086                | 3.663399  | 0.062975  |
| 12            | 6             | 0           | -0.410838               | 3.713652  | 0.154696  |
| 13            | 1             | 0           | -2.423019               | -2.191729 | -0.685461 |
| 14            | 1             | 0           | -5.125937               | 1.848967  | 0.217753  |
| 15            | 1             | 0           | -2.996245               | 3.246958  | 0.264950  |
| 16            | 1             | 0           | 1.593962                | 4.597519  | 0.069765  |
| 17            | 6             | 0           | 1.787520                | 0.019974  | -0.084996 |
| 18            | 6             | 0           | 2.292177                | -0.516885 | 1.102221  |
| 19            | 6             | 0           | 1.979375                | -0.659865 | -1.291508 |
| 20            | 6             | 0           | 2.944307                | -1.752771 | 1.096280  |
| 21            | 1             | 0           | 2.198909                | 0.043609  | 2.027232  |
| 22            | 6             | 0           | 2.620519                | -1.896800 | -1.307210 |
| 23            | 1             | 0           | 1.629203                | -0.213886 | -2.216837 |
| 24            | 6             | 0           | 3.102188                | -2.446444 | -0.110458 |
| 25            | 1             | 0           | 3.377578                | -2.151857 | 2.008369  |
| 26            | 1             | 0           | 2.797842                | -2.413345 | -2.245309 |
| 27            | 6             | 0           | 3.213775                | 2.482875  | -0.127916 |
| 28            | 7             | 0           | 1.050396                | 1.246426  | -0.059124 |
| 29            | 9             | 0           | 3.697950                | 3.708507  | -0.206799 |
| 30            | 9             | 0           | 3.751372                | 1.882396  | 0.949332  |
| 31            | 9             | 0           | 3.606715                | 1.792748  | -1.210701 |
| 32            | 7             | 0           | -0.919111               | -0.016804 | -0.112674 |

|    |    |   |           |           |           |
|----|----|---|-----------|-----------|-----------|
| 33 | 8  | 0 | -1.045387 | 4.739066  | 0.279982  |
| 34 | 1  | 0 | -4.807458 | -2.359332 | -0.512881 |
| 35 | 6  | 0 | -7.185600 | -1.486509 | -0.218477 |
| 36 | 1  | 0 | -7.009690 | -1.883215 | -1.223266 |
| 37 | 1  | 0 | -6.921226 | -2.232374 | 0.537944  |
| 38 | 1  | 0 | -8.236970 | -1.227348 | -0.114280 |
| 39 | 8  | 0 | -6.468297 | -0.272041 | -0.014169 |
| 40 | 17 | 0 | 3.895901  | -3.976623 | -0.125930 |
| 41 | 38 | 0 | -0.047186 | -2.348534 | 0.398797  |

-----  
Rotational constants (GHZ): 0.1734402 0.1045038 0.0679582

Integral accuracy reduced to 1.0D-05 until final iterations.

Initial convergence to 1.0D-05 achieved. Increase integral accuracy.

SCF Done: E(RCAM-B3LYP) = -1788.42796914 A.U. after 8 cycles

NFock= 8 Conv=0.54D-08 -V/T= 2.0049

Calling FoFJK, ICntrl= 2127 FMM=F ISym2X=0 I1Cent= 0 IOpClX= 0 NMat=1  
NMatS=1 NMatT=0.

\*\*\*\*\* Axes restored to original set \*\*\*\*\*

Cartesian Forces: Max 0.023775294 RMS 0.007606450

CPIOFr: IOpCl= 0 IRwI=-1 IRwCP= 731 ICalc= 4 LCPTot= 342487 Len1MO=  
885792 IndFrg= 4771447

CPIOFr: IOpCl= 0 IRwI=-2 IRwCP= 731 ICalc= 0 LCPTot= 342487 Len1MO=  
885792 IndFrg= 1228279

Counterpoise corrected energy = -1818.346904483129

BSSE energy = 0.005001044150

sum of monomers = -1818.203525578751

complexation energy = -93.11 kcal/mole (raw)

**complexation energy = -89.97 kcal/mole (corrected)**

### ix. 3k-Cs

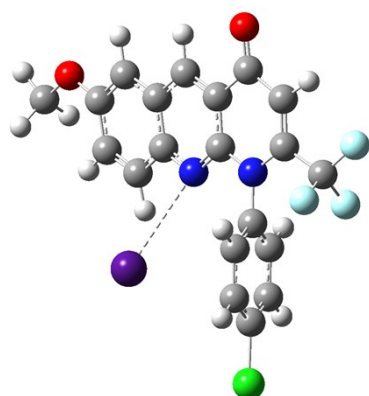

### Cartesian coordinates of optimized structure

-----

| Center Number | Atomic Number | Atomic Type | Coordinates (Angstroms) |           |           |
|---------------|---------------|-------------|-------------------------|-----------|-----------|
|               |               |             | X                       | Y         | Z         |
| 1             | 6             | 0           | -4.314297               | -0.971060 | -0.796346 |
| 2             | 6             | 0           | -2.943098               | -0.903962 | -0.765395 |

-----

|    |    |   |           |           |           |
|----|----|---|-----------|-----------|-----------|
| 3  | 6  | 0 | -2.270480 | 0.272509  | -0.361897 |
| 4  | 6  | 0 | -3.067966 | 1.401600  | -0.024225 |
| 5  | 6  | 0 | -4.473628 | 1.314758  | -0.043809 |
| 6  | 6  | 0 | -5.100172 | 0.145497  | -0.414487 |
| 7  | 6  | 0 | -2.379838 | 2.590493  | 0.292025  |
| 8  | 6  | 0 | -1.011597 | 2.631215  | 0.250230  |
| 9  | 6  | 0 | -0.306029 | 1.433905  | -0.071935 |
| 10 | 6  | 0 | 1.758864  | 2.682463  | 0.058184  |
| 11 | 6  | 0 | 1.137142  | 3.836930  | 0.357816  |
| 12 | 6  | 0 | -0.306575 | 3.902493  | 0.535946  |
| 13 | 1  | 0 | -2.357434 | -1.743085 | -1.128618 |
| 14 | 1  | 0 | -5.078540 | 2.175985  | 0.217481  |
| 15 | 1  | 0 | -2.908612 | 3.502186  | 0.554232  |
| 16 | 1  | 0 | 1.703887  | 4.751646  | 0.455911  |
| 17 | 6  | 0 | 1.810200  | 0.233505  | -0.301178 |
| 18 | 6  | 0 | 2.512102  | -0.334761 | 0.756549  |
| 19 | 6  | 0 | 1.794405  | -0.393184 | -1.544798 |
| 20 | 6  | 0 | 3.205140  | -1.528612 | 0.575997  |
| 21 | 1  | 0 | 2.544498  | 0.171349  | 1.714644  |
| 22 | 6  | 0 | 2.465905  | -1.593091 | -1.728950 |
| 23 | 1  | 0 | 1.254931  | 0.063501  | -2.366029 |
| 24 | 6  | 0 | 3.166577  | -2.156218 | -0.663834 |
| 25 | 1  | 0 | 3.784167  | -1.959686 | 1.385181  |
| 26 | 1  | 0 | 2.466918  | -2.082512 | -2.696107 |
| 27 | 6  | 0 | 3.264308  | 2.704207  | -0.142792 |
| 28 | 7  | 0 | 1.097302  | 1.465685  | -0.104476 |
| 29 | 9  | 0 | 3.715610  | 3.954001  | -0.199076 |
| 30 | 9  | 0 | 3.904884  | 2.091649  | 0.868019  |
| 31 | 9  | 0 | 3.611321  | 2.088084  | -1.279967 |
| 32 | 7  | 0 | -0.905228 | 0.291329  | -0.332294 |
| 33 | 8  | 0 | -0.902778 | 4.912956  | 0.865848  |
| 34 | 1  | 0 | -4.794514 | -1.880012 | -1.137158 |
| 35 | 6  | 0 | -7.148274 | -1.002866 | -0.846266 |
| 36 | 1  | 0 | -6.915044 | -1.238721 | -1.890325 |
| 37 | 1  | 0 | -6.933557 | -1.872811 | -0.215372 |
| 38 | 1  | 0 | -8.205925 | -0.757662 | -0.764282 |
| 39 | 8  | 0 | -6.448076 | 0.146588  | -0.404160 |
| 40 | 17 | 0 | 3.993394  | -3.669803 | -0.884712 |
| 41 | 55 | 0 | -0.233248 | -2.696682 | 1.000884  |

-----  
Rotational constants (GHZ): 0.1383378 0.0992869 0.0629963

Integral accuracy reduced to 1.0D-05 until final iterations.

DSYEVD-2 returned Info= 105109 IAlg= 4 N= 456 NDim= 456 NE2= 2353113  
trying DSYEV.

Initial convergence to 1.0D-05 achieved. Increase integral accuracy.

SCF Done: E(RCAM-B3LYP) = -1788.43381986 A.U. after 8 cycles

NFock= 8 Conv=0.56D-08 -V/T= 2.0049

Calling FoFJK, ICntrl= 2127 FMM=F ISym2X=0 IICent= 0 IOPCLX= 0 NMat=1  
NMatS=1 NMatT=0.

\*\*\*\*\* Axes restored to original set \*\*\*\*\*

Cartesian Forces: Max 0.009615937 RMS 0.002777271  
CPIOFr: IOpCl= 0 IRwI=-1 IRwCP= 731 ICalc= 4 LCPTot= 342487 Len1MO=  
885792 IndFrg= 4771447

CPIOFr: IOpCl= 0 IRwI=-2 IRwCP= 731 ICalc= 0 LCPTot= 342487 Len1MO=  
885792 IndFrg= 1228279

Counterpoise corrected energy = -1808.156268197121

BSSE energy = 0.003380716835

sum of monomers = -1808.135815368074

complexation energy = -14.96 kcal/mole (raw)

**complexation energy = -12.83 kcal/mole (corrected)**

x. 3k-Ba

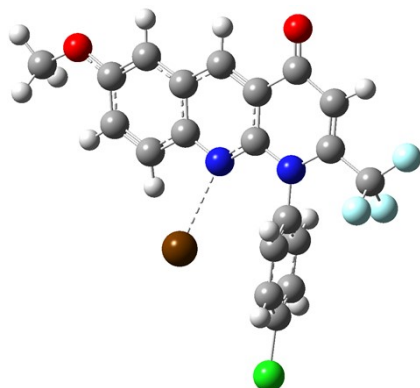

### Cartesian coordinates of optimized structure

| Center Number | Atomic Number | Atomic Type | Coordinates (Angstroms) |           |           |
|---------------|---------------|-------------|-------------------------|-----------|-----------|
|               |               |             | X                       | Y         | Z         |
| 1             | 6             | 0           | -4.344154               | -1.160219 | -0.518241 |
| 2             | 6             | 0           | -2.966100               | -1.076075 | -0.515737 |
| 3             | 6             | 0           | -2.295752               | 0.130204  | -0.213731 |
| 4             | 6             | 0           | -3.103834               | 1.271389  | 0.037497  |
| 5             | 6             | 0           | -4.503574               | 1.170786  | 0.057734  |
| 6             | 6             | 0           | -5.136026               | -0.035235 | -0.191763 |
| 7             | 6             | 0           | -2.429729               | 2.501376  | 0.213595  |
| 8             | 6             | 0           | -1.066162               | 2.567108  | 0.136273  |
| 9             | 6             | 0           | -0.332529               | 1.361673  | -0.054368 |
| 10            | 6             | 0           | 1.711501                | 2.675375  | -0.017801 |
| 11            | 6             | 0           | 1.064390                | 3.836180  | 0.144023  |
| 12            | 6             | 0           | -0.389725               | 3.884212  | 0.280674  |
| 13            | 1             | 0           | -2.426817               | -1.921892 | -0.947769 |
| 14            | 1             | 0           | -5.111167               | 2.048450  | 0.250446  |
| 15            | 1             | 0           | -2.973707               | 3.425242  | 0.392246  |
| 16            | 1             | 0           | 1.611926                | 4.768761  | 0.170162  |
| 17            | 6             | 0           | 1.799601                | 0.202333  | -0.162621 |
| 18            | 6             | 0           | 2.406540                | -0.325135 | 0.978169  |
| 19            | 6             | 0           | 1.912459                | -0.468690 | -1.382943 |
| 20            | 6             | 0           | 3.095142                | -1.537924 | 0.913100  |

|    |    |   |           |           |           |
|----|----|---|-----------|-----------|-----------|
| 21 | 1  | 0 | 2.374635  | 0.231003  | 1.909680  |
| 22 | 6  | 0 | 2.584008  | -1.685053 | -1.454833 |
| 23 | 1  | 0 | 1.480030  | -0.028860 | -2.275491 |
| 24 | 6  | 0 | 3.171260  | -2.222316 | -0.302835 |
| 25 | 1  | 0 | 3.610797  | -1.927216 | 1.785566  |
| 26 | 1  | 0 | 2.699337  | -2.195517 | -2.405666 |
| 27 | 6  | 0 | 3.221539  | 2.674136  | -0.168465 |
| 28 | 7  | 0 | 1.059637  | 1.425522  | -0.078045 |
| 29 | 9  | 0 | 3.688487  | 3.906830  | -0.261168 |
| 30 | 9  | 0 | 3.806514  | 2.082079  | 0.888569  |
| 31 | 9  | 0 | 3.585624  | 1.993005  | -1.265489 |
| 32 | 7  | 0 | -0.915079 | 0.173307  | -0.177312 |
| 33 | 8  | 0 | -1.017329 | 4.901964  | 0.484672  |
| 34 | 1  | 0 | -4.820408 | -2.089601 | -0.805587 |
| 35 | 6  | 0 | -7.193175 | -1.222140 | -0.467790 |
| 36 | 1  | 0 | -7.006170 | -1.525734 | -1.502637 |
| 37 | 1  | 0 | -6.946045 | -2.038674 | 0.218529  |
| 38 | 1  | 0 | -8.244080 | -0.964816 | -0.354052 |
| 39 | 8  | 0 | -6.469722 | -0.039491 | -0.141280 |
| 40 | 17 | 0 | 3.988495  | -3.742342 | -0.384625 |
| 41 | 56 | 0 | -0.109428 | -2.345394 | 0.554049  |

-----  
Rotational constants (GHZ): 0.1537437 0.1024441 0.0646801

Integral accuracy reduced to 1.0D-05 until final iterations.

Initial convergence to 1.0D-05 achieved. Increase integral accuracy.

SCF Done: E(RCAM-B3LYP) = -1788.42772996 A.U. after 8 cycles

NFock= 8 Conv=0.78D-08 -V/T= 2.0049

Calling FoFJK, ICntrl= 2127 FMM=F ISym2X=0 I1Cent= 0 IOpClX= 0 NMat=1  
NMatS=1 NMatT=0.

\*\*\*\*\* Axes restored to original set \*\*\*\*\*

Cartesian Forces: Max 0.022083496 RMS 0.006973532

CPIOFr: IOpCl= 0 IRwI=-1 IRwCP= 731 ICalc= 4 LCPTot= 342487 Len1MO=  
885792 IndFrg= 4771447

CPIOFr: IOpCl= 0 IRwI=-2 IRwCP= 731 ICalc= 0 LCPTot= 342487 Len1MO=  
885792 IndFrg= 1228279

Counterpoise corrected energy = -1813.158594643937

BSSE energy = 0.004767165877

sum of monomers = -1813.046137624002

complexation energy = -73.56 kcal/mole (raw)

**complexation energy = -70.57 kcal/mole (corrected)**



b. Interaction with two metal ion molecules

i. Li-3k-Li

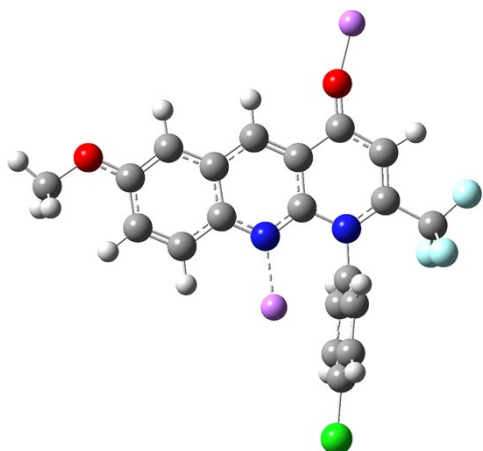

Cartesian coordinates of optimized structure

| Center Number | Atomic Number | Atomic Type | Coordinates (Angstroms) |           |           |
|---------------|---------------|-------------|-------------------------|-----------|-----------|
|               |               |             | X                       | Y         | Z         |
| 1             | 6             | 0           | 4.207336                | 1.908926  | -0.000655 |
| 2             | 6             | 0           | 2.842456                | 1.796091  | -0.000779 |
| 3             | 6             | 0           | 2.215126                | 0.532198  | -0.000321 |
| 4             | 6             | 0           | 3.050918                | -0.628489 | 0.000121  |
| 5             | 6             | 0           | 4.454163                | -0.495170 | 0.000262  |
| 6             | 6             | 0           | 5.040607                | 0.752581  | -0.000091 |
| 7             | 6             | 0           | 2.408561                | -1.872056 | 0.000271  |
| 8             | 6             | 0           | 1.027590                | -1.958721 | 0.000083  |
| 9             | 6             | 0           | 0.284442                | -0.745981 | -0.000163 |
| 10            | 6             | 0           | -1.746418               | -2.019436 | -0.000082 |
| 11            | 6             | 0           | -1.079359               | -3.202595 | 0.000135  |
| 12            | 6             | 0           | 0.347578                | -3.245787 | 0.000224  |
| 13            | 1             | 0           | 2.240735                | 2.701266  | -0.001375 |
| 14            | 1             | 0           | 5.090042                | -1.373101 | 0.000630  |
| 15            | 1             | 0           | 2.986551                | -2.789747 | 0.000497  |
| 16            | 1             | 0           | -1.640930               | -4.125888 | 0.000134  |
| 17            | 6             | 0           | -1.826812               | 0.449775  | -0.000113 |
| 18            | 6             | 0           | -2.104521               | 1.083082  | 1.212055  |
| 19            | 6             | 0           | -2.103806               | 1.083692  | -1.212116 |
| 20            | 6             | 0           | -2.642815               | 2.368450  | 1.213856  |
| 21            | 1             | 0           | -1.889466               | 0.581230  | 2.149183  |
| 22            | 6             | 0           | -2.642085               | 2.369060  | -1.213588 |
| 23            | 1             | 0           | -1.888158               | 0.582323  | -2.149366 |
| 24            | 6             | 0           | -2.911038               | 3.012419  | 0.000218  |
| 25            | 1             | 0           | -2.865776               | 2.868625  | 2.149743  |
| 26            | 1             | 0           | -2.864475               | 2.869710  | -2.149354 |
| 27            | 6             | 0           | -3.270786               | -2.018308 | -0.000264 |

|    |    |   |           |           |           |
|----|----|---|-----------|-----------|-----------|
| 28 | 7  | 0 | -1.114924 | -0.805181 | -0.000227 |
| 29 | 9  | 0 | -3.736019 | -3.259523 | -0.000526 |
| 30 | 9  | 0 | -3.732227 | -1.388768 | 1.084384  |
| 31 | 9  | 0 | -3.731880 | -1.388408 | -1.084863 |
| 32 | 7  | 0 | 0.852318  | 0.450448  | -0.000317 |
| 33 | 8  | 0 | 0.988805  | -4.324803 | 0.000288  |
| 34 | 1  | 0 | 4.655340  | 2.894886  | -0.001020 |
| 35 | 6  | 0 | 7.051507  | 2.053147  | 0.000335  |
| 36 | 1  | 0 | 6.813423  | 2.630030  | -0.898252 |
| 37 | 1  | 0 | 6.812416  | 2.630416  | 0.898408  |
| 38 | 1  | 0 | 8.112068  | 1.810867  | 0.000979  |
| 39 | 8  | 0 | 6.372581  | 0.797818  | 0.000231  |
| 40 | 17 | 0 | -3.573507 | 4.597165  | 0.000413  |
| 41 | 3  | 0 | -0.285315 | 2.120554  | 0.000898  |
| 42 | 3  | 0 | 1.392082  | -6.034016 | 0.000812  |

-----  
Rotational constants (GHZ): 0.1871392 0.1091970 0.0716082

SCF Done: E(RCAM-B3LYP) = -7.26429228391 A.U. after 1 cycles

NFock= 1 Conv=0.97D-16 -V/T= 2.0092

QCSCF skips out because SCF is already converged.

Calling FoFJK, ICntrl= 2127 FMM=F ISym2X=0 I1Cent= 0 IOpClX= 0 NMat=1  
NMatS=1 NMatT=0.

\*\*\*\*\* Axes restored to original set \*\*\*\*\*

Cartesian Forces: Max 0.000000000 RMS 0.000000000

CPIOFr: IOpCl= 0 IRwI=-1 IRwCP= 731 ICalc= 6 LCPTot= 351494 Len1MO=  
908642 IndFrg= 6711988

CPIOFr: IOpCl= 0 IRwI=-2 IRwCP= 731 ICalc= 0 LCPTot= 351494 Len1MO=  
908642 IndFrg= 1260136

Counterpoise corrected energy = -1803.071694871855

B SSE energy = 0.009967404368

sum of monomers = -1802.960033359005

complexation energy = -76.32 kcal/mole (raw)

**complexation energy = -70.07 kcal/mole (corrected)**

## ii. Be-3k-Be

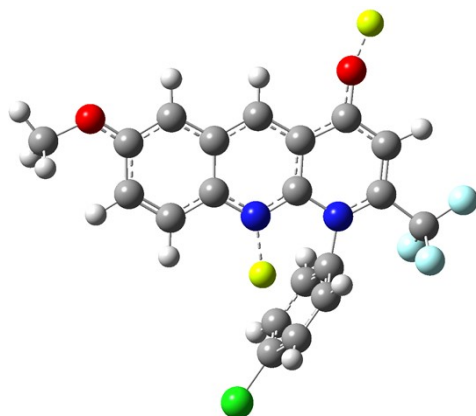

**Cartesian coordinates of optimized structure**

| Center<br>Number | Atomic<br>Number | Atomic<br>Type | Coordinates (Angstroms) |           |           |
|------------------|------------------|----------------|-------------------------|-----------|-----------|
|                  |                  |                | X                       | Y         | Z         |
| 1                | 6                | 0              | -4.259406               | -0.961142 | -0.000388 |
| 2                | 6                | 0              | -2.894952               | -1.155691 | -0.000473 |
| 3                | 6                | 0              | -2.024659               | -0.064859 | -0.000167 |
| 4                | 6                | 0              | -2.587064               | 1.277530  | 0.000144  |
| 5                | 6                | 0              | -3.980539               | 1.450664  | 0.000256  |
| 6                | 6                | 0              | -4.837568               | 0.354366  | -0.000008 |
| 7                | 6                | 0              | -1.702598               | 2.352458  | 0.000137  |
| 8                | 6                | 0              | -0.308728               | 2.157525  | 0.000047  |
| 9                | 6                | 0              | 0.163690                | 0.817586  | -0.000030 |
| 10               | 6                | 0              | 2.436626                | 1.574305  | -0.000065 |
| 11               | 6                | 0              | 2.028345                | 2.892396  | -0.000152 |
| 12               | 6                | 0              | 0.669320                | 3.195284  | -0.000018 |
| 13               | 1                | 0              | -2.512424               | -2.174330 | -0.000792 |
| 14               | 1                | 0              | -4.414904               | 2.444661  | 0.000525  |
| 15               | 1                | 0              | -2.099927               | 3.361732  | 0.000181  |
| 16               | 1                | 0              | 2.787240                | 3.666803  | -0.000243 |
| 17               | 6                | 0              | 1.854676                | -0.848941 | 0.000050  |
| 18               | 6                | 0              | 1.744388                | -1.542632 | 1.221566  |
| 19               | 6                | 0              | 1.744160                | -1.542597 | -1.221451 |
| 20               | 6                | 0              | 1.424180                | -2.908316 | 1.221861  |
| 21               | 1                | 0              | 1.768576                | -1.001399 | 2.164582  |
| 22               | 6                | 0              | 1.423526                | -2.908255 | -1.221602 |
| 23               | 1                | 0              | 1.768175                | -1.001415 | -2.164500 |
| 24               | 6                | 0              | 1.284114                | -3.626084 | 0.000147  |
| 25               | 1                | 0              | 1.267355                | -3.426569 | 2.166413  |
| 26               | 1                | 0              | 1.266202                | -3.426372 | -2.166142 |
| 27               | 6                | 0              | 3.918861                | 1.175926  | -0.000157 |
| 28               | 7                | 0              | 1.534772                | 0.567533  | 0.000008  |
| 29               | 9                | 0              | 4.675393                | 2.246074  | -0.000382 |
| 30               | 9                | 0              | 4.146100                | 0.435373  | 1.084383  |
| 31               | 9                | 0              | 4.145936                | 0.434980  | -1.084419 |
| 32               | 7                | 0              | -0.658651               | -0.252492 | -0.000162 |
| 33               | 8                | 0              | 0.278754                | 4.472785  | 0.000070  |
| 34               | 1                | 0              | -4.913179               | -1.827463 | -0.000622 |
| 35               | 6                | 0              | -7.117691               | -0.459857 | 0.000025  |
| 36               | 1                | 0              | -7.026742               | -1.063122 | -0.905545 |
| 37               | 1                | 0              | -7.026375               | -1.063744 | 0.905145  |
| 38               | 1                | 0              | -8.071011               | 0.062766  | 0.000402  |
| 39               | 8                | 0              | -6.117981               | 0.592340  | 0.000182  |
| 40               | 17               | 0              | 0.911600                | -5.261429 | 0.000212  |
| 41               | 4                | 0              | 0.171482                | -1.699514 | -0.000377 |
| 42               | 4                | 0              | 0.256476                | 5.884670  | 0.000749  |

Rotational constants (GHZ): 0.1775687 0.1213848 0.0750287

SCF Done: E(RCAM-B3LYP) = -13.6302816171 A.U. after 1 cycles

NFock= 1 Conv=0.24D-15 -V/T= 2.0080  
 QCSCF skips out because SCF is already converged.  
 Calling FoFJK, ICntrl= 2127 FMM=F ISym2X=0 IICent= 0 IOpClX= 0 NMat=1  
 NMatS=1 NMatT=0.

\*\*\*\*\* Axes restored to original set \*\*\*\*\*

Cartesian Forces: Max 0.000000000 RMS 0.000000000  
 CPIOFr: IOpCl= 0 IRwI=-1 IRwCP= 731 ICalc= 6 LCPTot= 351494 Len1MO=  
 908654 IndFrg= 6712072  
 CPIOFr: IOpCl= 0 IRwI=-2 IRwCP= 731 ICalc= 0 LCPTot= 351494 Len1MO=  
 908654 IndFrg= 1260148

Counterpoise corrected energy = -1816.263549727275

BSSE energy = 0.013090735724

sum of monomers = -1815.647624265975

complexation energy = -394.71 kcal/mole (raw)

**complexation energy = -386.50 kcal/mole (corrected)**

### iii. Na-3k-Na

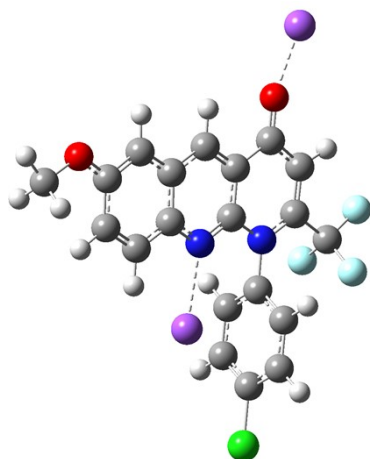

### Cartesian coordinates of optimized structure

| Center Number | Atomic Number | Atomic Type | Coordinates (Angstroms) |           |           |
|---------------|---------------|-------------|-------------------------|-----------|-----------|
|               |               |             | X                       | Y         | Z         |
| 1             | 6             | 0           | 3.956979                | -2.615919 | 0.000168  |
| 2             | 6             | 0           | 2.616851                | -2.331794 | 0.000250  |
| 3             | 6             | 0           | 2.140106                | -1.001134 | 0.000071  |
| 4             | 6             | 0           | 3.118038                | 0.039599  | -0.000121 |
| 5             | 6             | 0           | 4.494096                | -0.264966 | -0.000224 |
| 6             | 6             | 0           | 4.925027                | -1.573472 | -0.000126 |
| 7             | 6             | 0           | 2.637697                | 1.355794  | -0.000143 |
| 8             | 6             | 0           | 1.284153                | 1.614139  | -0.000064 |
| 9             | 6             | 0           | 0.388190                | 0.504352  | 0.000031  |
| 10            | 6             | 0           | -1.450513               | 2.051101  | -0.000082 |
| 11            | 6             | 0           | -0.634459               | 3.132920  | -0.000079 |
| 12            | 6             | 0           | 0.792205                | 2.992593  | -0.000025 |
| 13            | 1             | 0           | 1.920199                | -3.165380 | 0.000473  |
| 14            | 1             | 0           | 5.231757                | 0.529478  | -0.000366 |

|    |    |   |           |           |           |
|----|----|---|-----------|-----------|-----------|
| 15 | 1  | 0 | 3.323846  | 2.195679  | -0.000185 |
| 16 | 1  | 0 | -1.068275 | 4.122111  | -0.000142 |
| 17 | 6  | 0 | -1.902853 | -0.365757 | 0.000029  |
| 18 | 6  | 0 | -2.334660 | -0.905514 | -1.209690 |
| 19 | 6  | 0 | -2.334921 | -0.905257 | 1.209768  |
| 20 | 6  | 0 | -3.192428 | -2.001951 | -1.213034 |
| 21 | 1  | 0 | -2.012521 | -0.463454 | -2.146267 |
| 22 | 6  | 0 | -3.192689 | -2.001700 | 1.213158  |
| 23 | 1  | 0 | -2.012978 | -0.463001 | 2.146319  |
| 24 | 6  | 0 | -3.620981 | -2.547720 | 0.000070  |
| 25 | 1  | 0 | -3.551034 | -2.417834 | -2.147971 |
| 26 | 1  | 0 | -3.551503 | -2.417381 | 2.148104  |
| 27 | 6  | 0 | -2.959232 | 2.277279  | -0.000275 |
| 28 | 7  | 0 | -0.993131 | 0.754642  | -0.000001 |
| 29 | 9  | 0 | -3.233921 | 3.577112  | -0.000250 |
| 30 | 9  | 0 | -3.517518 | 1.732558  | -1.085525 |
| 31 | 9  | 0 | -3.517882 | 1.732471  | 1.084768  |
| 32 | 7  | 0 | 0.796925  | -0.752119 | 0.000155  |
| 33 | 8  | 0 | 1.568351  | 3.966494  | 0.000012  |
| 34 | 1  | 0 | 4.278429  | -3.649990 | 0.000335  |
| 35 | 6  | 0 | 6.760045  | -3.109612 | -0.000147 |
| 36 | 1  | 0 | 6.451372  | -3.653606 | 0.897837  |
| 37 | 1  | 0 | 6.451040  | -3.653926 | -0.897823 |
| 38 | 1  | 0 | 7.842933  | -3.003960 | -0.000366 |
| 39 | 8  | 0 | 6.244712  | -1.780920 | -0.000291 |
| 40 | 17 | 0 | -4.688243 | -3.902395 | 0.000113  |
| 41 | 11 | 0 | 2.278220  | 6.037065  | 0.000687  |
| 42 | 11 | 0 | -0.574058 | -2.815014 | 0.000327  |

-----  
Rotational constants (GHZ): 0.1509391 0.1015750 0.0627576

Integral accuracy reduced to 1.0D-05 until final iterations.

Initial convergence to 1.0D-05 achieved. Increase integral accuracy.

SCF Done: E(RCAM-B3LYP) = -1788.43338827 A.U. after 8 cycles

NFock= 8 Conv=0.58D-08 -V/T= 2.0049

QCSCF skips out because SCF is already converged.

Calling FoFJK, ICntrl= 2127 FMM=F ISym2X=0 I1Cent= 0 IOpClX= 0 NMat=1  
NMatS=1 NMatT=0.

\*\*\*\*\* Axes restored to original set \*\*\*\*\*

Cartesian Forces: Max 0.034459247 RMS 0.006236749

CPIOFr: IOpCl= 0 IRwI=-1 IRwCP= 731 ICalc= 6 LCPTot= 348655 Len1MO=  
900916 IndFrg= 6655067

CPIOFr: IOpCl= 0 IRwI=-2 IRwCP= 731 ICalc= 0 LCPTot= 348655 Len1MO=  
900916 IndFrg= 1249571

Counterpoise corrected energy = -1788.480919246945

BSSE energy = 0.008545552926

sum of monomers = -1788.433388269636

complexation energy = -35.19 kcal/mole (raw)

**complexation energy = -29.83 kcal/mole (corrected)**

iv. Mg-3k-Mg

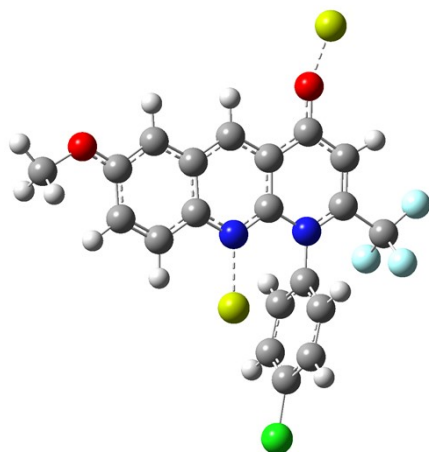

Cartesian coordinates of optimized structure

| Center Number | Atomic Number | Atomic Type | Coordinates (Angstroms) |           |           |
|---------------|---------------|-------------|-------------------------|-----------|-----------|
|               |               |             | X                       | Y         | Z         |
| 1             | 6             | 0           | -3.935950               | -2.452233 | 0.000488  |
| 2             | 6             | 0           | -2.585466               | -2.200223 | 0.000845  |
| 3             | 6             | 0           | -2.084400               | -0.890459 | 0.000395  |
| 4             | 6             | 0           | -3.033178               | 0.193001  | -0.000394 |
| 5             | 6             | 0           | -4.413078               | -0.075376 | -0.000761 |
| 6             | 6             | 0           | -4.887582               | -1.380949 | -0.000334 |
| 7             | 6             | 0           | -2.510247               | 1.487071  | -0.000798 |
| 8             | 6             | 0           | -1.133068               | 1.721440  | -0.000407 |
| 9             | 6             | 0           | -0.267111               | 0.588811  | 0.000094  |
| 10            | 6             | 0           | 1.632069                | 2.045474  | -0.000859 |
| 11            | 6             | 0           | 0.835909                | 3.159724  | -0.001377 |
| 12            | 6             | 0           | -0.566333               | 3.048554  | -0.001109 |
| 13            | 1             | 0           | -1.910638               | -3.063353 | 0.001571  |
| 14            | 1             | 0           | -5.134620               | 0.734249  | -0.001428 |
| 15            | 1             | 0           | -3.186205               | 2.334623  | -0.001581 |
| 16            | 1             | 0           | 1.319205                | 4.128141  | -0.002411 |
| 17            | 6             | 0           | 1.949140                | -0.399563 | 0.000205  |
| 18            | 6             | 0           | 2.259305                | -1.023721 | 1.217702  |
| 19            | 6             | 0           | 2.259226                | -1.024266 | -1.217074 |
| 20            | 6             | 0           | 2.838628                | -2.300057 | 1.220778  |
| 21            | 1             | 0           | 2.033876                | -0.534487 | 2.161505  |
| 22            | 6             | 0           | 2.838556                | -2.300574 | -1.219660 |
| 23            | 1             | 0           | 2.033740                | -0.535390 | -2.161050 |
| 24            | 6             | 0           | 3.161651                | -2.944058 | 0.000686  |
| 25            | 1             | 0           | 3.097827                | -2.778319 | 2.162475  |
| 26            | 1             | 0           | 3.097697                | -2.779228 | -2.161179 |
| 27            | 6             | 0           | 3.159954                | 2.187724  | -0.001214 |
| 28            | 7             | 0           | 1.117783                | 0.785458  | -0.000064 |
| 29            | 9             | 0           | 3.494474                | 3.461499  | -0.001332 |
| 30            | 9             | 0           | 3.651095                | 1.590633  | 1.084142  |

|    |    |   |           |           |           |
|----|----|---|-----------|-----------|-----------|
| 31 | 9  | 0 | 3.650643  | 1.590585  | -1.086748 |
| 32 | 7  | 0 | -0.729118 | -0.667560 | 0.000511  |
| 33 | 8  | 0 | -1.329664 | 4.098169  | -0.002555 |
| 34 | 1  | 0 | -4.287538 | -3.478167 | 0.000801  |
| 35 | 6  | 0 | -6.793925 | -2.861458 | -0.000954 |
| 36 | 1  | 0 | -6.515548 | -3.408622 | -0.904532 |
| 37 | 1  | 0 | -6.516837 | -3.408161 | 0.903303  |
| 38 | 1  | 0 | -7.865099 | -2.675395 | -0.001768 |
| 39 | 8  | 0 | -6.185914 | -1.549991 | -0.000866 |
| 40 | 17 | 0 | 3.939127  | -4.447471 | 0.000995  |
| 41 | 12 | 0 | 0.548809  | -2.321226 | 0.000576  |
| 42 | 12 | 0 | -1.818606 | 5.871458  | 0.005219  |

-----  
 Rotational constants (GHZ): 0.1467765 0.1087928 0.0646644

No special actions if energy rises.

SCF Done: E(RCAM-B3LYP) = 0.000000000000E+00 A.U. after 1 cycles

NFock= 1 Conv=0.00D+00 -V/T= 0.0000

QCSCF skips out because SCF is already converged.

Calling FoFJK, ICntrl= 2127 FMM=F ISym2X=0 I1Cent= 0 IOpClX= 0 NMat=1  
 NMatS=1 NMatT=0.

\*\*\*\*\* Axes restored to original set \*\*\*\*\*

Cartesian Forces: Max 0.000000000 RMS 0.000000000

CPIOFr: IOpCl= 0 IRwI=-1 IRwCP= 731 ICalc= 6 LCPTot= 348655 Len1MO=  
 900916 IndFrg= 6655067

CPIOFr: IOpCl= 0 IRwI=-2 IRwCP= 731 ICalc= 0 LCPTot= 348655 Len1MO=  
 900916 IndFrg= 1249571

Counterpoise corrected energy = -1788.638286037795

BSSE energy = 0.010664801063

sum of monomers = -1788.414564464560

complexation energy = -147.08 kcal/mole (raw)

**complexation energy = -140.39 kcal/mole (corrected)**

#### v. K-3k-K

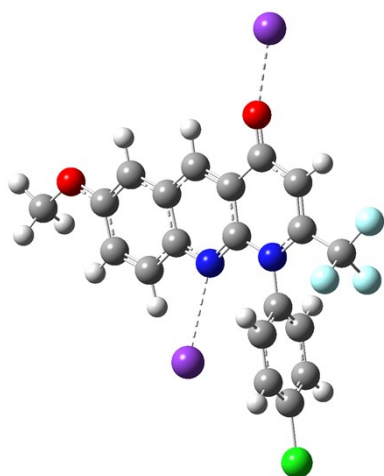

-----  
 Cartesian coordinates of optimized structure

| Center<br>Number | Atomic<br>Number | Atomic<br>Type | Coordinates (Angstroms) |           |           |
|------------------|------------------|----------------|-------------------------|-----------|-----------|
|                  |                  |                | X                       | Y         | Z         |
| 1                | 6                | 0              | 2.989024                | -3.694329 | 0.214805  |
| 2                | 6                | 0              | 1.780273                | -3.048792 | 0.203238  |
| 3                | 6                | 0              | 1.689716                | -1.642711 | 0.073115  |
| 4                | 6                | 0              | 2.916748                | -0.918643 | -0.011114 |
| 5                | 6                | 0              | 4.153346                | -1.595078 | -0.011185 |
| 6                | 6                | 0              | 4.204729                | -2.967525 | 0.090608  |
| 7                | 6                | 0              | 2.819760                | 0.479478  | -0.067036 |
| 8                | 6                | 0              | 1.593204                | 1.101654  | -0.034748 |
| 9                | 6                | 0              | 0.425779                | 0.281749  | 0.017231  |
| 10               | 6                | 0              | -0.912800               | 2.277698  | 0.061247  |
| 11               | 6                | 0              | 0.168692                | 3.091228  | 0.020221  |
| 12               | 6                | 0              | 1.505645                | 2.566769  | -0.046728 |
| 13               | 1                | 0              | 0.879348                | -3.633828 | 0.356785  |
| 14               | 1                | 0              | 5.082161                | -1.040204 | -0.080870 |
| 15               | 1                | 0              | 3.709839                | 1.097073  | -0.119982 |
| 16               | 1                | 0              | 0.026991                | 4.161542  | 0.046586  |
| 17               | 6                | 0              | -2.019851               | 0.079840  | 0.062540  |
| 18               | 6                | 0              | -2.758997               | -0.099468 | -1.102245 |
| 19               | 6                | 0              | -2.430485               | -0.507679 | 1.256571  |
| 20               | 6                | 0              | -3.919083               | -0.869639 | -1.077411 |
| 21               | 1                | 0              | -2.448854               | 0.384145  | -2.021784 |
| 22               | 6                | 0              | -3.580791               | -1.285364 | 1.286689  |
| 23               | 1                | 0              | -1.857255               | -0.346181 | 2.162717  |
| 24               | 6                | 0              | -4.323482               | -1.462478 | 0.117504  |
| 25               | 1                | 0              | -4.520937               | -0.988944 | -1.971551 |
| 26               | 1                | 0              | -3.920768               | -1.731488 | 2.214578  |
| 27               | 6                | 0              | -2.293828               | 2.921902  | 0.133469  |
| 28               | 7                | 0              | -0.834209               | 0.902730  | 0.037753  |
| 29               | 9                | 0              | -2.184373               | 4.237062  | 0.299031  |
| 30               | 9                | 0              | -2.976095               | 2.706942  | -0.998395 |
| 31               | 9                | 0              | -3.001379               | 2.433004  | 1.154344  |
| 32               | 7                | 0              | 0.468004                | -1.035947 | 0.047701  |
| 33               | 8                | 0              | 2.512701                | 3.289083  | -0.097951 |
| 34               | 1                | 0              | 3.014163                | -4.770318 | 0.334343  |
| 35               | 6                | 0              | 5.542505                | -4.946856 | 0.211104  |
| 36               | 1                | 0              | 5.143676                | -5.294216 | 1.169406  |
| 37               | 1                | 0              | 5.046529                | -5.467585 | -0.614197 |
| 38               | 1                | 0              | 6.610415                | -5.152345 | 0.172766  |
| 39               | 8                | 0              | 5.417151                | -3.534992 | 0.080815  |
| 40               | 17               | 0              | -5.754724               | -2.433314 | 0.150836  |
| 41               | 19               | 0              | 4.059087                | 5.346442  | -0.127246 |
| 42               | 19               | 0              | -1.514580               | -3.026186 | -0.775711 |

Rotational constants (GHZ): 0.1219206 0.0947154 0.0551725

No special actions if energy rises.

SCF Done: E(RCAM-B3LYP) = -27.9367253505 A.U. after 1 cycles



NFock= 1 Conv=0.16D-12 -V/T= 3.7447  
 QCSCF skips out because SCF is already converged.  
 Calling FoFJK, ICntrl= 2127 FMM=F ISym2X=0 IICent= 0 IOpClX= 0 NMat=1  
 NMatS=1 NMatT=0.

\*\*\*\*\* Axes restored to original set \*\*\*\*\*

Cartesian Forces: Max 0.000000000 RMS 0.000000000  
 CPIOFr: IOpCl= 0 IRwI=-1 IRwCP= 731 ICalc= 6 LCPTot= 360083 Len1MO=  
 931596 IndFrg= 6881255  
 CPIOFr: IOpCl= 0 IRwI=-2 IRwCP= 731 ICalc= 0 LCPTot= 360083 Len1MO=  
 931596 IndFrg= 1291679

Counterpoise corrected energy = -1844.323621277858

BSSE energy = 0.008255566578

sum of monomers = -1844.306960422741

complexation energy = -15.64 kcal/mole (raw)

**complexation energy = -10.45 kcal/mole (corrected)**

#### vi. Ca-3k-Ca

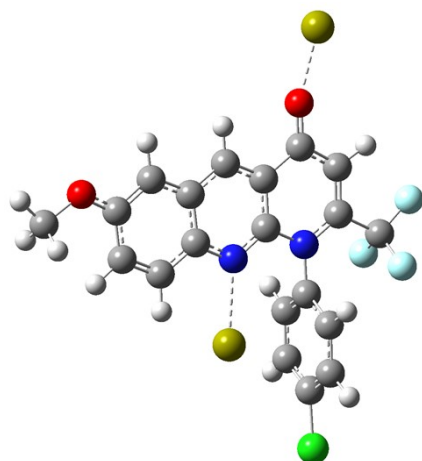

#### Cartesian coordinates of optimized structure

| Center Number | Atomic Number | Atomic Type | Coordinates (Angstroms) |           |           |
|---------------|---------------|-------------|-------------------------|-----------|-----------|
|               |               |             | X                       | Y         | Z         |
| 1             | 6             | 0           | -3.136976               | -3.594694 | 0.000268  |
| 2             | 6             | 0           | -1.902912               | -2.993352 | 0.000253  |
| 3             | 6             | 0           | -1.748000               | -1.592534 | 0.000052  |
| 4             | 6             | 0           | -2.951449               | -0.812341 | -0.000079 |
| 5             | 6             | 0           | -4.213603               | -1.433198 | -0.000090 |
| 6             | 6             | 0           | -4.332555               | -2.813895 | 0.000064  |
| 7             | 6             | 0           | -2.796555               | 0.577554  | -0.000150 |
| 8             | 6             | 0           | -1.541660               | 1.167758  | -0.000083 |
| 9             | 6             | 0           | -0.401442               | 0.305174  | -0.000021 |
| 10            | 6             | 0           | 1.018442                | 2.236112  | 0.000031  |
| 11            | 6             | 0           | -0.044381               | 3.089575  | -0.000027 |
| 12            | 6             | 0           | -1.379149               | 2.613700  | -0.000083 |
| 13            | 1             | 0           | -1.041065               | -3.668363 | 0.000581  |

|    |    |   |           |           |           |
|----|----|---|-----------|-----------|-----------|
| 14 | 1  | 0 | -5.120450 | -0.838669 | -0.000201 |
| 15 | 1  | 0 | -3.673431 | 1.214736  | -0.000240 |
| 16 | 1  | 0 | 0.156040  | 4.151989  | -0.000006 |
| 17 | 6  | 0 | 2.030254  | 0.000918  | 0.000047  |
| 18 | 6  | 0 | 2.583755  | -0.419892 | 1.213728  |
| 19 | 6  | 0 | 2.584179  | -0.419435 | -1.213588 |
| 20 | 6  | 0 | 3.672979  | -1.294639 | 1.216999  |
| 21 | 1  | 0 | 2.184406  | -0.053600 | 2.155082  |
| 22 | 6  | 0 | 3.673417  | -1.294191 | -1.216792 |
| 23 | 1  | 0 | 2.185192  | -0.052788 | -2.154957 |
| 24 | 6  | 0 | 4.238244  | -1.723409 | 0.000123  |
| 25 | 1  | 0 | 4.134899  | -1.589350 | 2.155371  |
| 26 | 1  | 0 | 4.135678  | -1.588543 | -2.155109 |
| 27 | 6  | 0 | 2.438393  | 2.817702  | 0.000132  |
| 28 | 7  | 0 | 0.877502  | 0.875190  | 0.000016  |
| 29 | 9  | 0 | 2.385077  | 4.138048  | 0.000315  |
| 30 | 9  | 0 | 3.092331  | 2.405701  | 1.086035  |
| 31 | 9  | 0 | 3.092384  | 2.406012  | -1.085850 |
| 32 | 7  | 0 | -0.498220 | -1.023686 | -0.000009 |
| 33 | 8  | 0 | -2.375184 | 3.411467  | -0.000123 |
| 34 | 1  | 0 | -3.204966 | -4.676514 | 0.000466  |
| 35 | 6  | 0 | -5.777584 | -4.740028 | 0.000205  |
| 36 | 1  | 0 | -5.362721 | -5.195198 | -0.902557 |
| 37 | 1  | 0 | -5.362836 | -5.194987 | 0.903126  |
| 38 | 1  | 0 | -6.858917 | -4.853977 | 0.000149  |
| 39 | 8  | 0 | -5.547556 | -3.317738 | 0.000053  |
| 40 | 17 | 0 | 5.608092  | -2.740024 | 0.000172  |
| 41 | 20 | 0 | 1.312723  | -2.730472 | -0.000719 |
| 42 | 20 | 0 | -3.612271 | 5.260779  | -0.000008 |

-----  
Rotational constants (GHZ): 0.1260398 0.0967990 0.0564136

No special actions if energy rises.

SCF Done: E(RCAM-B3LYP) = -35.8434693286 A.U. after 1 cycles

NFock= 1 Conv=0.41D-15 -V/T= 3.8132

QCSCF skips out because SCF is already converged.

Calling FoFJK, ICntrl= 2127 FMM=F ISym2X=0 I1Cent= 0 IOpClX= 0 NMat=1  
NMatS=1 NMatT=0.

\*\*\*\*\* Axes restored to original set \*\*\*\*\*

Cartesian Forces: Max 0.000000000 RMS 0.000000000

CPIOFr: IOpCl= 0 IRwI=-1 IRwCP= 731 ICalc= 6 LCPTot= 360083 Len1MO=  
931596 IndFrg= 6881255

CPIOFr: IOpCl= 0 IRwI=-2 IRwCP= 731 ICalc= 0 LCPTot= 360083 Len1MO=  
931596 IndFrg= 1291679

Counterpoise corrected energy = -1860.171145663334

BSSE energy = 0.010034313266

sum of monomers = -1860.110581272526

complexation energy = -44.30 kcal/mole (raw)

**complexation energy = -38.00 kcal/mole (corrected)**

vii. Rb-3k-Rb

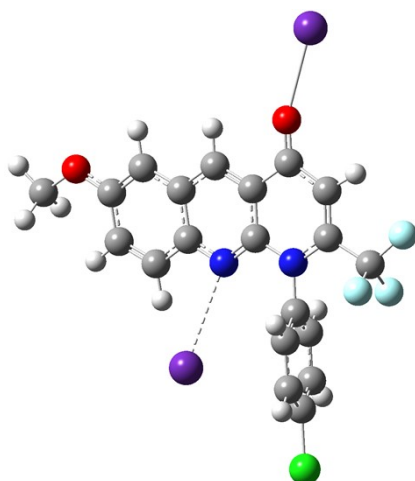

Cartesian coordinates of optimized structure

| Center Number | Atomic Number | Atomic Type | Coordinates (Angstroms) |           |           |
|---------------|---------------|-------------|-------------------------|-----------|-----------|
|               |               |             | X                       | Y         | Z         |
| 1             | 6             | 0           | -0.349657               | 4.738053  | -0.434528 |
| 2             | 6             | 0           | -0.846781               | 3.461250  | -0.409066 |
| 3             | 6             | 0           | -0.004641               | 2.340879  | -0.212629 |
| 4             | 6             | 0           | 1.393616                | 2.592688  | -0.080939 |
| 5             | 6             | 0           | 1.890306                | 3.911958  | -0.092384 |
| 6             | 6             | 0           | 1.039718                | 4.982238  | -0.256428 |
| 7             | 6             | 0           | 2.227550                | 1.469038  | 0.025544  |
| 8             | 6             | 0           | 1.701810                | 0.198736  | -0.005628 |
| 9             | 6             | 0           | 0.283912                | 0.061335  | -0.101928 |
| 10            | 6             | 0           | 0.565438                | -2.325287 | -0.119860 |
| 11            | 6             | 0           | 1.913907                | -2.239754 | -0.038471 |
| 12            | 6             | 0           | 2.588990                | -0.971388 | 0.045576  |
| 13            | 1             | 0           | -1.900814               | 3.302469  | -0.611002 |
| 14            | 1             | 0           | 2.952863                | 4.099316  | 0.014186  |
| 15            | 1             | 0           | 3.303166                | 1.579039  | 0.113008  |
| 16            | 1             | 0           | 2.503063                | -3.144679 | -0.049455 |
| 17            | 6             | 0           | -1.705591               | -1.374537 | -0.177819 |
| 18            | 6             | 0           | -2.404283               | -1.760974 | 0.960531  |
| 19            | 6             | 0           | -2.377422               | -1.154116 | -1.377053 |
| 20            | 6             | 0           | -3.784089               | -1.938325 | 0.902221  |
| 21            | 1             | 0           | -1.871114               | -1.957166 | 1.883897  |
| 22            | 6             | 0           | -3.754588               | -1.315073 | -1.439414 |
| 23            | 1             | 0           | -1.820811               | -0.868083 | -2.262286 |
| 24            | 6             | 0           | -4.453148               | -1.708686 | -0.297351 |
| 25            | 1             | 0           | -4.334424               | -2.276134 | 1.773544  |
| 26            | 1             | 0           | -4.286172               | -1.163842 | -2.372101 |
| 27            | 6             | 0           | -0.058272               | -3.713827 | -0.217454 |
| 28            | 7             | 0           | -0.270627               | -1.229976 | -0.121013 |
| 29            | 9             | 0           | 0.886243                | -4.636202 | -0.386589 |
| 30            | 9             | 0           | -0.725951               | -4.016154 | 0.903697  |
| 31            | 9             | 0           | -0.902960               | -3.793085 | -1.247862 |

|    |    |   |           |           |           |
|----|----|---|-----------|-----------|-----------|
| 32 | 7  | 0 | -0.538808 | 1.087477  | -0.176803 |
| 33 | 8  | 0 | 3.819555  | -0.865280 | 0.135100  |
| 34 | 1  | 0 | -1.023917 | 5.567174  | -0.609980 |
| 35 | 6  | 0 | 0.772394  | 7.350220  | -0.459278 |
| 36 | 1  | 0 | 0.287879  | 7.323149  | -1.440499 |
| 37 | 1  | 0 | 0.018779  | 7.447394  | 0.328908  |
| 38 | 1  | 0 | 1.445517  | 8.204258  | -0.416562 |
| 39 | 8  | 0 | 1.589882  | 6.204252  | -0.254724 |
| 40 | 17 | 0 | -6.173153 | -1.902006 | -0.369640 |
| 41 | 37 | 0 | -3.544453 | 1.468360  | 0.931071  |
| 42 | 37 | 0 | 6.541997  | -1.498378 | 0.211330  |

-----  
 Rotational constants (GHZ): 0.1047180 0.0652803 0.0417483

SCF Done: E(RCAM-B3LYP) = -23.6734311154 A.U. after 1 cycles

NFock= 1 Conv=0.35D-13 -V/T= 4.3225

QCSCF skips out because SCF is already converged.

Calling FoFJK, ICntrl= 2127 FMM=F ISym2X=0 I1Cent= 0 IOpClX= 0 NMat=1  
 NMatS=1 NMatT=0.

\*\*\*\*\* Axes restored to original set \*\*\*\*\*

Cartesian Forces: Max 0.000000000 RMS 0.000000000

CPIOFr: IOpCl= 0 IRwI=-1 IRwCP= 731 ICalc= 6 LCPTot= 360083 Len1MO=  
 931608 IndFrg= 6881339

CPIOFr: IOpCl= 0 IRwI=-2 IRwCP= 731 ICalc= 0 LCPTot= 360083 Len1MO=  
 931608 IndFrg= 1291691

Counterpoise corrected energy = -1835.786216641622

BSE energy = 0.006927503996

sum of monomers = -1835.780440721484

complexation energy = -7.97 kcal/mole (raw)

**complexation energy = -3.62 kcal/mole (corrected)**

### viii. Sr-3k-Sr

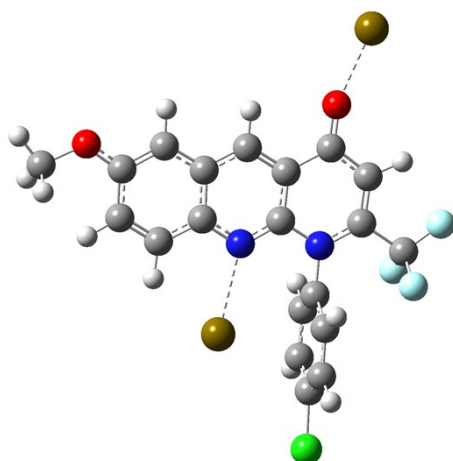

### Cartesian coordinates of optimized structure

-----  
 Center Atomic Atomic Coordinates (Angstroms)

| Number | Number | Type | X         | Y         | Z         |
|--------|--------|------|-----------|-----------|-----------|
| 1      | 6      | 0    | 0.233499  | 4.830898  | -0.000155 |
| 2      | 6      | 0    | -0.421189 | 3.624091  | -0.000166 |
| 3      | 6      | 0    | 0.262566  | 2.389307  | -0.000060 |
| 4      | 6      | 0    | 1.694106  | 2.461239  | 0.000025  |
| 5      | 6      | 0    | 2.361072  | 3.699758  | 0.000048  |
| 6      | 6      | 0    | 1.657898  | 4.892081  | -0.000023 |
| 7      | 6      | 0    | 2.383679  | 1.244590  | 0.000058  |
| 8      | 6      | 0    | 1.712769  | 0.035376  | 0.000020  |
| 9      | 6      | 0    | 0.281779  | 0.066421  | -0.000015 |
| 10     | 6      | 0    | 0.279765  | -2.334227 | -0.000021 |
| 11     | 6      | 0    | 1.639013  | -2.399307 | -0.000006 |
| 12     | 6      | 0    | 2.442041  | -1.227847 | 0.000018  |
| 13     | 1      | 0    | -1.511017 | 3.676893  | -0.000336 |
| 14     | 1      | 0    | 3.444606  | 3.740596  | 0.000116  |
| 15     | 1      | 0    | 3.467567  | 1.239639  | 0.000103  |
| 16     | 1      | 0    | 2.103281  | -3.375189 | -0.000006 |
| 17     | 6      | 0    | -1.859370 | -1.144653 | -0.000047 |
| 18     | 6      | 0    | -2.553775 | -1.172457 | 1.212260  |
| 19     | 6      | 0    | -2.553744 | -1.172269 | -1.212376 |
| 20     | 6      | 0    | -3.948694 | -1.195995 | 1.215633  |
| 21     | 1      | 0    | -2.011838 | -1.207882 | 2.152743  |
| 22     | 6      | 0    | -3.948659 | -1.195808 | -1.215790 |
| 23     | 1      | 0    | -2.011778 | -1.207534 | -2.152849 |
| 24     | 6      | 0    | -4.653397 | -1.222179 | -0.000091 |
| 25     | 1      | 0    | -4.493471 | -1.266315 | 2.152978  |
| 26     | 1      | 0    | -4.493410 | -1.265976 | -2.153162 |
| 27     | 6      | 0    | -0.514465 | -3.647481 | -0.000004 |
| 28     | 7      | 0    | -0.413063 | -1.150775 | -0.000024 |
| 29     | 9      | 0    | 0.316748  | -4.677199 | -0.000068 |
| 30     | 9      | 0    | -1.284329 | -3.714318 | 1.086008  |
| 31     | 9      | 0    | -1.284473 | -3.714299 | -1.085910 |
| 32     | 7      | 0    | -0.422186 | 1.196994  | -0.000041 |
| 33     | 8      | 0    | 3.709995  | -1.283675 | 0.000043  |
| 34     | 1      | 0    | -0.341298 | 5.749658  | -0.000260 |
| 35     | 6      | 0    | 1.713037  | 7.296903  | -0.000071 |
| 36     | 1      | 0    | 1.109791  | 7.425370  | -0.902421 |
| 37     | 1      | 0    | 1.109561  | 7.425380  | 0.902125  |
| 38     | 1      | 0    | 2.523367  | 8.021973  | 0.000028  |
| 39     | 8      | 0    | 2.355979  | 6.009755  | 0.000020  |
| 40     | 17     | 0    | -6.362685 | -1.294254 | -0.000119 |
| 41     | 38     | 0    | -3.079689 | 1.615115  | 0.000200  |
| 42     | 38     | 0    | 5.964166  | -2.117872 | -0.000010 |

Rotational constants (GHZ): 0.1068633 0.0699955 0.0432776

SCF Done: E(RCAM-B3LYP) = -29.7755564424 A.U. after 1 cycles

NFock= 1 Conv=0.39D-14 -V/T= 4.4694

QCSCF skips out because SCF is already converged.

Calling FoFJK, ICntrl= 2127 FMM=F ISym2X=0 I1Cent= 0 IOpClX= 0 NMat=1  
 NMatS=1 NMatT=0.

\*\*\*\*\* Axes restored to original set \*\*\*\*\*

Cartesian Forces: Max 0.000000000 RMS 0.000000000  
 CPIOFr: IOpCl= 0 IRwI=-1 IRwCP= 731 ICalc= 6 LCPTot= 360083 Len1MO=  
 931608 IndFrg= 6881339  
 CPIOFr: IOpCl= 0 IRwI=-2 IRwCP= 731 ICalc= 0 LCPTot= 360083 Len1MO=  
 931608 IndFrg= 1291691

Counterpoise corrected energy = -1847.990085297811  
 BSSE energy = 0.008926138302  
 sum of monomers = -1847.976308522411  
 complexation energy = -14.25 kcal/mole (raw)  
**complexation energy = -8.65 kcal/mole (corrected)**

### ix. Cs-3k-Cs

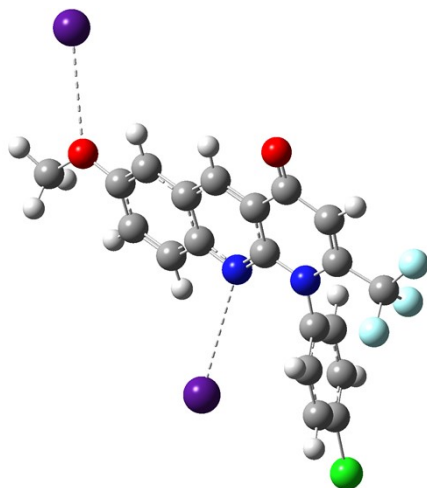

### Cartesian coordinates of optimized structure

| Center<br>Number | Atomic<br>Number | Atomic<br>Type | Coordinates (Angstroms) |           |           |
|------------------|------------------|----------------|-------------------------|-----------|-----------|
|                  |                  |                | X                       | Y         | Z         |
| 1                | 6                | 0              | 2.448599                | -2.147429 | 0.310612  |
| 2                | 6                | 0              | 1.143103                | -1.727728 | 0.345499  |
| 3                | 6                | 0              | 0.775357                | -0.403145 | 0.004118  |
| 4                | 6                | 0              | 1.820729                | 0.485567  | -0.365807 |
| 5                | 6                | 0              | 3.157863                | 0.034737  | -0.417993 |
| 6                | 6                | 0              | 3.477619                | -1.256212 | -0.082638 |
| 7                | 6                | 0              | 1.453926                | 1.814796  | -0.648522 |
| 8                | 6                | 0              | 0.151260                | 2.209046  | -0.526515 |
| 9                | 6                | 0              | -0.827730               | 1.238315  | -0.152862 |
| 10               | 6                | 0              | -2.472860               | 3.007314  | -0.148928 |
| 11               | 6                | 0              | -1.587209               | 3.954059  | -0.508159 |
| 12               | 6                | 0              | -0.196540               | 3.629984  | -0.773448 |
| 13               | 1                | 0              | 0.373545                | -2.406275 | 0.697550  |
| 14               | 1                | 0              | 3.935207                | 0.723617  | -0.731677 |
| 15               | 1                | 0              | 2.180851                | 2.564750  | -0.946738 |

|    |    |   |           |           |           |
|----|----|---|-----------|-----------|-----------|
| 16 | 1  | 0 | -1.895232 | 4.987019  | -0.584503 |
| 17 | 6  | 0 | -3.169089 | 0.676208  | 0.293010  |
| 18 | 6  | 0 | -4.100120 | 0.320723  | -0.676600 |
| 19 | 6  | 0 | -3.240071 | 0.123030  | 1.568935  |
| 20 | 6  | 0 | -5.116481 | -0.580060 | -0.370967 |
| 21 | 1  | 0 | -4.057991 | 0.776259  | -1.659276 |
| 22 | 6  | 0 | -4.236816 | -0.792171 | 1.875652  |
| 23 | 1  | 0 | -2.522199 | 0.421728  | 2.323970  |
| 24 | 6  | 0 | -5.172633 | -1.138450 | 0.901693  |
| 25 | 1  | 0 | -5.871927 | -0.830659 | -1.107633 |
| 26 | 1  | 0 | -4.311348 | -1.214967 | 2.871105  |
| 27 | 6  | 0 | -3.900984 | 3.441544  | 0.150897  |
| 28 | 7  | 0 | -2.155622 | 1.651705  | -0.015600 |
| 29 | 9  | 0 | -3.984738 | 4.766411  | 0.204010  |
| 30 | 9  | 0 | -4.748374 | 3.020019  | -0.800659 |
| 31 | 9  | 0 | -4.318235 | 2.952286  | 1.324386  |
| 32 | 7  | 0 | -0.534398 | -0.029982 | 0.065985  |
| 33 | 8  | 0 | 0.641289  | 4.437082  | -1.136380 |
| 34 | 1  | 0 | 2.685174  | -3.161851 | 0.606223  |
| 35 | 6  | 0 | 5.115742  | -2.996098 | -0.066162 |
| 36 | 1  | 0 | 4.916075  | -3.417407 | 0.924197  |
| 37 | 1  | 0 | 4.564939  | -3.559776 | -0.824532 |
| 38 | 1  | 0 | 6.181986  | -3.084673 | -0.278435 |
| 39 | 8  | 0 | 4.801921  | -1.607829 | -0.121511 |
| 40 | 17 | 0 | -6.410611 | -2.297053 | 1.275584  |
| 41 | 55 | 0 | -2.471139 | -2.946972 | -0.827352 |
| 42 | 55 | 0 | 7.605792  | 0.351580  | 0.389438  |

-----  
Rotational constants (GHZ): 0.1283497 0.0352046 0.0287929

SCF Done: E(RCAM-B3LYP) = -19.7019955092 A.U. after 1 cycles

NFock= 1 Conv=0.28D-12 -V/T= 5.0390

QCSCF skips out because SCF is already converged.

Calling FoFJK, ICntrl= 2127 FMM=F ISym2X=0 I1Cent= 0 IOpClX= 0 NMat=1  
NMatS=1 NMatT=0.

\*\*\*\*\* Axes restored to original set \*\*\*\*\*

Cartesian Forces: Max 0.000000000 RMS 0.000000000

CPIOFr: IOpCl= 0 IRwI=-1 IRwCP= 731 ICalc= 6 LCPTot= 360083 Len1MO=  
931608 IndFrg= 6881339

CPIOFr: IOpCl= 0 IRwI=-2 IRwCP= 731 ICalc= 0 LCPTot= 360083 Len1MO=  
931608 IndFrg= 1291691

Counterpoise corrected energy = -1827.811241769859

BSSE energy = 0.004693813302

sum of monomers = -1827.836844153083

complexation energy = 13.12 kcal/mole (raw)

**complexation energy = 16.07 kcal/mole (corrected)**

x. Ba-3k-Ba

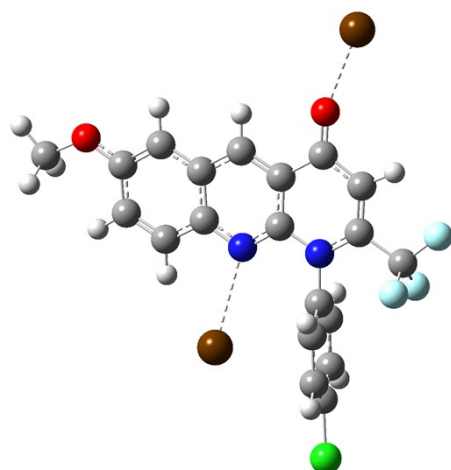

Cartesian coordinates of optimized structure

| Center Number | Atomic Number | Atomic Type | Coordinates (Angstroms) |           |           |
|---------------|---------------|-------------|-------------------------|-----------|-----------|
|               |               |             | X                       | Y         | Z         |
| 1             | 6             | 0           | -0.970100               | 4.743707  | -0.336825 |
| 2             | 6             | 0           | -1.351415               | 3.424264  | -0.314319 |
| 3             | 6             | 0           | -0.424455               | 2.372216  | -0.134227 |
| 4             | 6             | 0           | 0.950353                | 2.755399  | -0.019025 |
| 5             | 6             | 0           | 1.331318                | 4.110041  | -0.019740 |
| 6             | 6             | 0           | 0.393309                | 5.116904  | -0.159580 |
| 7             | 6             | 0           | 1.887107                | 1.717731  | 0.051464  |
| 8             | 6             | 0           | 1.495534                | 0.394506  | 0.012213  |
| 9             | 6             | 0           | 0.091905                | 0.115915  | -0.046059 |
| 10            | 6             | 0           | 0.613208                | -2.228095 | -0.060389 |
| 11            | 6             | 0           | 1.952286                | -1.998210 | -0.018980 |
| 12            | 6             | 0           | 2.487533                | -0.679468 | 0.025116  |
| 13            | 1             | 0           | -2.393549               | 3.218611  | -0.552731 |
| 14            | 1             | 0           | 2.375373                | 4.387328  | 0.074072  |
| 15            | 1             | 0           | 2.944777                | 1.945902  | 0.117793  |
| 16            | 1             | 0           | 2.617461                | -2.849434 | -0.027504 |
| 17            | 6             | 0           | -1.734786               | -1.534058 | -0.113841 |
| 18            | 6             | 0           | -2.405548               | -1.917081 | 1.047580  |
| 19            | 6             | 0           | -2.398431               | -1.525925 | -1.342481 |
| 20            | 6             | 0           | -3.751904               | -2.279320 | 0.986772  |
| 21            | 1             | 0           | -1.872617               | -1.981700 | 1.991184  |
| 22            | 6             | 0           | -3.743190               | -1.878420 | -1.408424 |
| 23            | 1             | 0           | -1.859577               | -1.274998 | -2.250900 |
| 24            | 6             | 0           | -4.422305               | -2.265119 | -0.243252 |
| 25            | 1             | 0           | -4.265689               | -2.634307 | 1.875626  |
| 26            | 1             | 0           | -4.254421               | -1.917528 | -2.365831 |
| 27            | 6             | 0           | 0.132050                | -3.684076 | -0.107377 |
| 28            | 7             | 0           | -0.323270               | -1.223867 | -0.058037 |
| 29            | 9             | 0           | 1.170490                | -4.499533 | -0.218215 |
| 30            | 9             | 0           | -0.525009               | -3.982862 | 1.015659  |



|    |    |   |           |           |           |
|----|----|---|-----------|-----------|-----------|
| 31 | 9  | 0 | -0.675706 | -3.874605 | -1.148556 |
| 32 | 7  | 0 | -0.839377 | 1.063494  | -0.088663 |
| 33 | 8  | 0 | 3.730775  | -0.460643 | 0.061727  |
| 34 | 1  | 0 | -1.714903 | 5.511176  | -0.511632 |
| 35 | 6  | 0 | -0.065900 | 7.470667  | -0.321683 |
| 36 | 1  | 0 | -0.544342 | 7.428469  | -1.303728 |
| 37 | 1  | 0 | -0.810479 | 7.495539  | 0.478438  |
| 38 | 1  | 0 | 0.558208  | 8.359159  | -0.261665 |
| 39 | 8  | 0 | 0.831590  | 6.362820  | -0.146141 |
| 40 | 17 | 0 | -6.076608 | -2.716594 | -0.324677 |
| 41 | 56 | 0 | -3.750928 | 1.011714  | 0.434414  |
| 42 | 56 | 0 | 6.322969  | -0.829167 | 0.070174  |

-----  
Rotational constants (GHZ): 0.1026918 0.0491138 0.0339951

SCF Done: E(RCAM-B3LYP) = -24.6184076656 A.U. after 1 cycles

NFock= 1 Conv=0.20D-13 -V/T= 5.2125

QCSCF skips out because SCF is already converged.

Calling FoFJK, ICntrl= 2127 FMM=F ISym2X=0 I1Cent= 0 IOpClX= 0 NMat=1  
NMatS=1 NMatT=0.

\*\*\*\*\* Axes restored to original set \*\*\*\*\*

Cartesian Forces: Max 0.000000000 RMS 0.000000000

CPIOFr: IOpCl= 0 IRwI=-1 IRwCP= 731 ICalc= 6 LCPTot= 360083 Len1MO=  
931608 IndFrg= 6881339

CPIOFr: IOpCl= 0 IRwI=-2 IRwCP= 731 ICalc= 0 LCPTot= 360083 Len1MO=  
931608 IndFrg= 1291691

Counterpoise corrected energy = -1837.636887108778

BSSE energy = 0.008459762774

sum of monomers = -1837.662655724651

complexation energy = 10.86 kcal/mole (raw)

**complexation energy = 16.17 kcal/mole (corrected)**

*c. Interaction with three metal ion molecules*

**i. Li-3k-Li-Li**

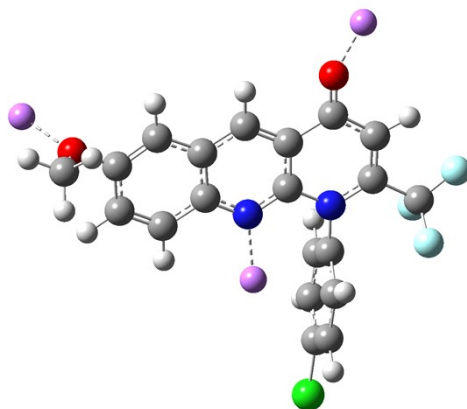

**Cartesian coordinates of optimized structure**

| Center<br>Number | Atomic<br>Number | Atomic<br>Type | Coordinates (Angstroms) |           |           |
|------------------|------------------|----------------|-------------------------|-----------|-----------|
|                  |                  |                | X                       | Y         | Z         |
| 1                | 6                | 0              | 4.055299                | 2.088859  | -0.164841 |
| 2                | 6                | 0              | 2.697180                | 1.932333  | -0.146486 |
| 3                | 6                | 0              | 2.114418                | 0.638466  | -0.122219 |
| 4                | 6                | 0              | 2.979640                | -0.493239 | -0.130409 |
| 5                | 6                | 0              | 4.391254                | -0.309835 | -0.154060 |
| 6                | 6                | 0              | 4.903434                | 0.954548  | -0.170566 |
| 7                | 6                | 0              | 2.383061                | -1.761955 | -0.098204 |
| 8                | 6                | 0              | 1.009261                | -1.891161 | -0.058512 |
| 9                | 6                | 0              | 0.225048                | -0.700731 | -0.054810 |
| 10               | 6                | 0              | -1.755992               | -2.046186 | 0.020115  |
| 11               | 6                | 0              | -1.054238               | -3.207378 | 0.018664  |
| 12               | 6                | 0              | 0.372618                | -3.210801 | -0.017348 |
| 13               | 1                | 0              | 2.061845                | 2.812071  | -0.143841 |
| 14               | 1                | 0              | 5.047116                | -1.174438 | -0.147550 |
| 15               | 1                | 0              | 2.986645                | -2.664021 | -0.099518 |
| 16               | 1                | 0              | -1.592804               | -4.144442 | 0.046788  |
| 17               | 6                | 0              | -1.932527               | 0.417813  | -0.002008 |
| 18               | 6                | 0              | -2.208000               | 1.045037  | 1.214700  |
| 19               | 6                | 0              | -2.286316               | 1.019810  | -1.211010 |
| 20               | 6                | 0              | -2.819614               | 2.297473  | 1.222218  |
| 21               | 1                | 0              | -1.942293               | 0.564901  | 2.150503  |
| 22               | 6                | 0              | -2.898060               | 2.272249  | -1.204988 |
| 23               | 1                | 0              | -2.081685               | 0.519750  | -2.151665 |
| 24               | 6                | 0              | -3.167112               | 2.913526  | 0.012022  |
| 25               | 1                | 0              | -3.045490               | 2.791168  | 2.161219  |
| 26               | 1                | 0              | -3.184756               | 2.746417  | -2.137423 |
| 27               | 6                | 0              | -3.284228               | -2.097080 | 0.060842  |
| 28               | 7                | 0              | -1.163119               | -0.807031 | -0.013625 |
| 29               | 9                | 0              | -3.698442               | -3.353826 | 0.087576  |
| 30               | 9                | 0              | -3.730974               | -1.470385 | 1.150266  |
| 31               | 9                | 0              | -3.787225               | -1.498021 | -1.019832 |
| 32               | 7                | 0              | 0.756819                | 0.517693  | -0.087032 |
| 33               | 8                | 0              | 1.054567                | -4.259846 | -0.014277 |
| 34               | 1                | 0              | 4.493420                | 3.081832  | -0.174462 |
| 35               | 6                | 0              | 6.852331                | 1.317991  | 1.158471  |
| 36               | 1                | 0              | 6.400398                | 2.181396  | 1.649382  |
| 37               | 1                | 0              | 6.677817                | 0.410461  | 1.737751  |
| 38               | 1                | 0              | 7.925067                | 1.480985  | 1.043872  |
| 39               | 8                | 0              | 6.287334                | 1.157439  | -0.181109 |
| 40               | 17               | 0              | -3.925499               | 4.448982  | 0.020670  |
| 41               | 3                | 0              | -0.525168               | 2.152113  | -0.063159 |
| 42               | 3                | 0              | 1.260640                | -6.046028 | 0.034891  |
| 43               | 3                | 0              | 7.458563                | 1.369748  | -1.641821 |

Rotational constants (GHZ): 0.1878888 0.0989942 0.0679443

SCF Done: E(RCAM-B3LYP) = -7.26429228391 A.U. after 1 cycles  
 NFock= 1 Conv=0.54D-16 -V/T= 2.0092  
 QCSCF skips out because SCF is already converged.  
 Calling FoFJK, ICntrl= 2127 FMM=F ISym2X=0 I1Cent= 0 IOpClX= 0 NMat=1  
 NMatS=1 NMatT=0.  
 \*\*\*\*\* Axes restored to original set \*\*\*\*\*  
 Cartesian Forces: Max 0.000000000 RMS 0.000000000  
 CPIOFr: IOpCl= 0 IRwI=-1 IRwCP= 731 ICalc= 8 LCPTot= 364953 Len1MO=  
 943371 IndFrg= 8855292  
 CPIOFr: IOpCl= 0 IRwI=-2 IRwCP= 731 ICalc= 0 LCPTot= 364953 Len1MO=  
 943371 IndFrg= 1308324  
 Counterpoise corrected energy = -1810.248257085240  
 BSSE energy = 0.013326532944  
 sum of monomers = -1810.219610155185  
 complexation energy = -26.34 kcal/mole (raw)  
**complexation energy = -17.98 kcal/mole (corrected)**

## ii. Be-3k-Be-Be

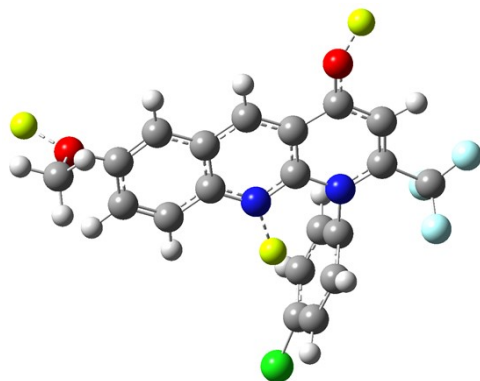

### Cartesian coordinates of optimized structure

| Center Number | Atomic Number | Atomic Type | Coordinates (Angstroms) |           |           |
|---------------|---------------|-------------|-------------------------|-----------|-----------|
|               |               |             | X                       | Y         | Z         |
| 1             | 6             | 0           | -4.046343               | -1.558563 | -0.192201 |
| 2             | 6             | 0           | -2.671435               | -1.564151 | -0.161526 |
| 3             | 6             | 0           | -1.938252               | -0.353032 | -0.138856 |
| 4             | 6             | 0           | -2.651634               | 0.890085  | -0.159693 |
| 5             | 6             | 0           | -4.091861               | 0.882265  | -0.196582 |
| 6             | 6             | 0           | -4.731873               | -0.322834 | -0.214623 |
| 7             | 6             | 0           | -1.917494               | 2.089196  | -0.128754 |
| 8             | 6             | 0           | -0.515888               | 2.080152  | -0.076229 |
| 9             | 6             | 0           | 0.116328                | 0.802952  | -0.058314 |
| 10            | 6             | 0           | 2.273309                | 1.840725  | 0.031816  |
| 11            | 6             | 0           | 1.709432                | 3.105584  | 0.015785  |
| 12            | 6             | 0           | 0.331333                | 3.263015  | -0.036383 |
| 13            | 1             | 0           | -2.163169               | -2.524129 | -0.145107 |
| 14            | 1             | 0           | -4.631500               | 1.825991  | -0.198726 |
| 15            | 1             | 0           | -2.439459               | 3.042666  | -0.142721 |
| 16            | 1             | 0           | 2.386256                | 3.955116  | 0.046529  |

|    |    |   |           |           |           |
|----|----|---|-----------|-----------|-----------|
| 17 | 6  | 0 | 2.031282  | -0.633401 | 0.013913  |
| 18 | 6  | 0 | 1.994637  | -1.341004 | 1.235710  |
| 19 | 6  | 0 | 2.095813  | -1.333741 | -1.210912 |
| 20 | 6  | 0 | 1.957299  | -2.743981 | 1.227746  |
| 21 | 1  | 0 | 1.884458  | -0.814853 | 2.182469  |
| 22 | 6  | 0 | 2.058361  | -2.736753 | -1.214229 |
| 23 | 1  | 0 | 2.064587  | -0.801808 | -2.160344 |
| 24 | 6  | 0 | 2.074503  | -3.482509 | 0.007318  |
| 25 | 1  | 0 | 1.875777  | -3.283144 | 2.172295  |
| 26 | 1  | 0 | 2.055435  | -3.270392 | -2.165388 |
| 27 | 6  | 0 | 3.812168  | 1.639761  | 0.091869  |
| 28 | 7  | 0 | 1.505320  | 0.726252  | -0.003550 |
| 29 | 9  | 0 | 4.404990  | 2.802457  | 0.120219  |
| 30 | 9  | 0 | 4.069983  | 0.934686  | 1.186729  |
| 31 | 9  | 0 | 4.156170  | 0.943826  | -0.985055 |
| 32 | 7  | 0 | -0.558070 | -0.372360 | -0.089696 |
| 33 | 8  | 0 | -0.209847 | 4.475283  | -0.049352 |
| 34 | 1  | 0 | -4.583380 | -2.505054 | -0.191962 |
| 35 | 6  | 0 | -6.846591 | -0.386480 | 1.287497  |
| 36 | 1  | 0 | -6.432808 | -1.268995 | 1.774648  |
| 37 | 1  | 0 | -6.566688 | 0.568113  | 1.730189  |
| 38 | 1  | 0 | -7.933444 | -0.467606 | 1.145688  |
| 39 | 8  | 0 | -6.208210 | -0.370548 | -0.178424 |
| 40 | 17 | 0 | 2.163335  | -5.141150 | 0.006168  |
| 41 | 4  | 0 | 0.547485  | -1.721682 | -0.050340 |
| 42 | 4  | 0 | -0.139618 | 5.925080  | -0.034822 |
| 43 | 4  | 0 | -7.287341 | -0.534379 | -1.243503 |

-----  
Rotational constants (GHZ): 0.1733622 0.1058504 0.0689620

SCF Done: E(RCAM-B3LYP) = -13.6302816171 A.U. after 1 cycles

NFock= 1 Conv=0.22D-15 -V/T= 2.0080

QCSCF skips out because SCF is already converged.

Calling FoFJK, ICntrl= 2127 FMM=F ISym2X=0 I1Cent= 0 IOpClX= 0 NMat=1  
NMatS=1 NMatT=0.

\*\*\*\*\* Axes restored to original set \*\*\*\*\*

Cartesian Forces: Max 0.000000000 RMS 0.000000000

CPIOFr: IOpCl= 0 IRwI=-1 IRwCP= 731 ICalc= 8 LCPTot= 364953 Len1MO=  
943389 IndFrg= 8855454

CPIOFr: IOpCl= 0 IRwI=-2 IRwCP= 731 ICalc= 0 LCPTot= 364953 Len1MO=  
943389 IndFrg= 1308342

Counterpoise corrected energy = -1829.578211313144

BSSE energy = 0.017463929312

sum of monomers = -1829.255606195869

complexation energy = -213.40 kcal/mole (raw)

**complexation energy = -202.44 kcal/mole (corrected)**

iii. Na-3k-Na-Na

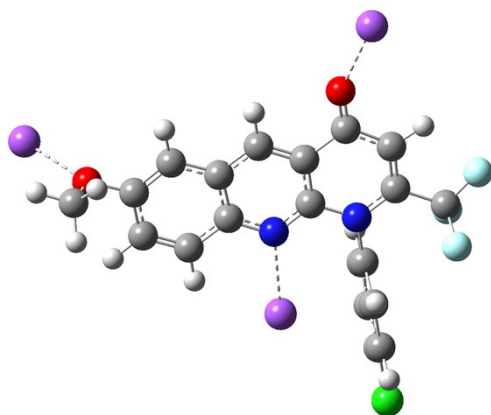

Cartesian coordinates of optimized structure

| Center Number | Atomic Number | Atomic Type | Coordinates (Angstroms) |           |           |
|---------------|---------------|-------------|-------------------------|-----------|-----------|
|               |               |             | X                       | Y         | Z         |
| 1             | 6             | 0           | 3.870020                | -2.198634 | -0.082838 |
| 2             | 6             | 0           | 2.511226                | -2.051529 | -0.043356 |
| 3             | 6             | 0           | 1.908639                | -0.765106 | -0.032201 |
| 4             | 6             | 0           | 2.771740                | 0.367544  | -0.042240 |
| 5             | 6             | 0           | 4.182896                | 0.195975  | -0.079335 |
| 6             | 6             | 0           | 4.714350                | -1.061585 | -0.102121 |
| 7             | 6             | 0           | 2.165654                | 1.632347  | -0.031246 |
| 8             | 6             | 0           | 0.794781                | 1.751264  | -0.009591 |
| 9             | 6             | 0           | 0.012434                | 0.555241  | -0.000428 |
| 10            | 6             | 0           | -1.966321               | 1.914418  | 0.049249  |
| 11            | 6             | 0           | -1.265393               | 3.072374  | 0.038341  |
| 12            | 6             | 0           | 0.166949                | 3.081965  | -0.001363 |
| 13            | 1             | 0           | 1.891631                | -2.941555 | -0.019968 |
| 14            | 1             | 0           | 4.829068                | 1.067568  | -0.101182 |
| 15            | 1             | 0           | 2.759459                | 2.540751  | -0.042247 |
| 16            | 1             | 0           | -1.802602               | 4.009447  | 0.060455  |
| 17            | 6             | 0           | -2.190267               | -0.532305 | 0.020072  |
| 18            | 6             | 0           | -2.640564               | -1.056373 | -1.190551 |
| 19            | 6             | 0           | -2.534723               | -1.137420 | 1.227592  |
| 20            | 6             | 0           | -3.429907               | -2.203745 | -1.196986 |
| 21            | 1             | 0           | -2.396766               | -0.560824 | -2.124274 |
| 22            | 6             | 0           | -3.322496               | -2.284982 | 1.226184  |
| 23            | 1             | 0           | -2.207442               | -0.704665 | 2.166927  |
| 24            | 6             | 0           | -3.773732               | -2.815874 | 0.012872  |
| 25            | 1             | 0           | -3.807526               | -2.606103 | -2.130684 |
| 26            | 1             | 0           | -3.617524               | -2.750724 | 2.160068  |
| 27            | 6             | 0           | -3.494025               | 1.993825  | 0.093534  |
| 28            | 7             | 0           | -1.379146               | 0.665929  | 0.023796  |
| 29            | 9             | 0           | -3.883521               | 3.261672  | 0.140282  |
| 30            | 9             | 0           | -4.022675               | 1.431208  | -0.994894 |
| 31            | 9             | 0           | -3.962305               | 1.368836  | 1.175016  |

|    |    |   |           |           |           |
|----|----|---|-----------|-----------|-----------|
| 32 | 7  | 0 | 0.549723  | -0.657733 | -0.015793 |
| 33 | 8  | 0 | 0.843679  | 4.123950  | -0.025516 |
| 34 | 1  | 0 | 4.315637  | -3.187962 | -0.099832 |
| 35 | 6  | 0 | 6.580207  | -1.369899 | -1.515504 |
| 36 | 1  | 0 | 6.120977  | -2.227144 | -2.013168 |
| 37 | 1  | 0 | 6.366576  | -0.455501 | -2.072681 |
| 38 | 1  | 0 | 7.660124  | -1.517908 | -1.466251 |
| 39 | 8  | 0 | 6.090794  | -1.251543 | -0.154470 |
| 40 | 17 | 0 | -4.760505 | -4.224637 | 0.009621  |
| 41 | 11 | 0 | 0.983994  | 6.362364  | -0.089918 |
| 42 | 11 | 0 | -0.742716 | -2.866166 | -0.151352 |
| 43 | 11 | 0 | 7.721890  | -1.583800 | 1.512088  |

-----  
 Rotational constants (GHZ): 0.1455542 0.0776223 0.0530272

SCF Done: E(RCAM-B3LYP) = 0.000000000000E+00 A.U. after 1 cycles

NFock= 1 Conv=0.00D+00 -V/T= 0.0000

QCSCF skips out because SCF is already converged.

Calling FoFJK, ICntrl= 2127 FMM=F ISym2X=0 I1Cent= 0 IOpClX= 0 NMat=1  
 NMatS=1 NMatT=0.

\*\*\*\*\* Axes restored to original set \*\*\*\*\*

Cartesian Forces: Max 0.000000000 RMS 0.000000000

CPIOFr: IOpCl= 0 IRwI=-1 IRwCP= 731 ICalc= 8 LCPTot= 360618 Len1MO=  
 931578 IndFrg= 8744820

CPIOFr: IOpCl= 0 IRwI=-2 IRwCP= 731 ICalc= 0 LCPTot= 360618 Len1MO=  
 931578 IndFrg= 1292196

Counterpoise corrected energy = -1788.382094164396

BSSE energy = 0.011181539244

sum of monomers = -1788.428749041155

complexation energy = 22.26 kcal/mole (raw)

**complexation energy = 29.28 kcal/mole (corrected)**

#### iv. Mg-3k-Mg-Mg

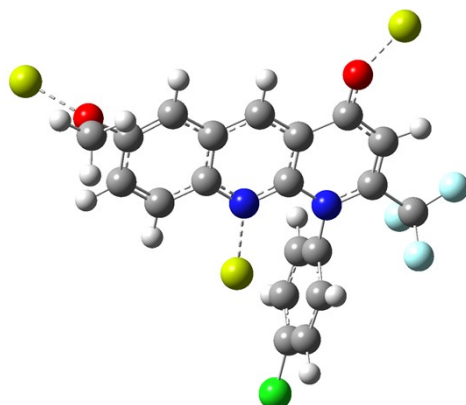

#### Cartesian coordinates of optimized structure

-----  

| Center Number | Atomic Number | Atomic Type | Coordinates (Angstroms) |   |   |
|---------------|---------------|-------------|-------------------------|---|---|
|               |               |             | X                       | Y | Z |

 -----

|    |    |   |           |           |           |
|----|----|---|-----------|-----------|-----------|
| 1  | 6  | 0 | -3.877229 | -2.084492 | -0.020191 |
| 2  | 6  | 0 | -2.509494 | -1.969646 | -0.046986 |
| 3  | 6  | 0 | -1.869800 | -0.704735 | -0.056388 |
| 4  | 6  | 0 | -2.697249 | 0.458122  | -0.062454 |
| 5  | 6  | 0 | -4.125926 | 0.324623  | -0.046062 |
| 6  | 6  | 0 | -4.685803 | -0.923601 | -0.020995 |
| 7  | 6  | 0 | -2.058004 | 1.711485  | -0.057407 |
| 8  | 6  | 0 | -0.671134 | 1.815451  | -0.043230 |
| 9  | 6  | 0 | 0.085491  | 0.595117  | -0.039525 |
| 10 | 6  | 0 | 2.108945  | 1.882729  | -0.016203 |
| 11 | 6  | 0 | 1.427095  | 3.067616  | -0.018049 |
| 12 | 6  | 0 | 0.022325  | 3.110377  | -0.027187 |
| 13 | 1  | 0 | -1.931441 | -2.891078 | -0.043410 |
| 14 | 1  | 0 | -4.739360 | 1.220986  | -0.032529 |
| 15 | 1  | 0 | -2.646306 | 2.624386  | -0.058830 |
| 16 | 1  | 0 | 2.016356  | 3.976751  | -0.010398 |
| 17 | 6  | 0 | 2.244992  | -0.565002 | -0.011276 |
| 18 | 6  | 0 | 2.543901  | -1.186803 | 1.215654  |
| 19 | 6  | 0 | 2.575535  | -1.194273 | -1.226010 |
| 20 | 6  | 0 | 3.134358  | -2.458842 | 1.228088  |
| 21 | 1  | 0 | 2.320953  | -0.694806 | 2.159655  |
| 22 | 6  | 0 | 3.165947  | -2.466407 | -1.214992 |
| 23 | 1  | 0 | 2.377459  | -0.707882 | -2.178385 |
| 24 | 6  | 0 | 3.503306  | -3.099214 | 0.013074  |
| 25 | 1  | 0 | 3.389176  | -2.927980 | 2.177068  |
| 26 | 1  | 0 | 3.445588  | -2.941338 | -2.153999 |
| 27 | 6  | 0 | 3.657039  | 1.900497  | -0.003426 |
| 28 | 7  | 0 | 1.477655  | 0.668226  | -0.024195 |
| 29 | 9  | 0 | 4.078293  | 3.145141  | -0.000262 |
| 30 | 9  | 0 | 4.077499  | 1.270017  | 1.087393  |
| 31 | 9  | 0 | 4.095045  | 1.269540  | -1.087090 |
| 32 | 7  | 0 | -0.493311 | -0.623182 | -0.047345 |
| 33 | 8  | 0 | -0.626128 | 4.224836  | -0.020993 |
| 34 | 1  | 0 | -4.327122 | -3.072990 | 0.017001  |
| 35 | 6  | 0 | -6.549041 | -1.032977 | 1.543079  |
| 36 | 1  | 0 | -6.053815 | -1.833335 | 2.093276  |
| 37 | 1  | 0 | -6.307148 | -0.048304 | 1.940684  |
| 38 | 1  | 0 | -7.636631 | -1.178930 | 1.572948  |
| 39 | 8  | 0 | -6.110921 | -1.091030 | 0.096940  |
| 40 | 17 | 0 | 4.333653  | -4.559273 | 0.028448  |
| 41 | 12 | 0 | 0.847901  | -2.374509 | -0.022527 |
| 42 | 12 | 0 | -0.600032 | 6.130753  | 0.009293  |
| 43 | 12 | 0 | -7.696441 | -1.560079 | -1.037678 |

-----  
Rotational constants (GHZ): 0.1453320 0.0791892 0.0534348

SCF Done: E(RCAM-B3LYP) = 0.000000000000E+00 A.U. after 1 cycles

NFock= 1 Conv=0.00D+00 -V/T= 0.0000

QCSCF skips out because SCF is already converged.

Calling FoFJK, ICntrl= 2127 FMM=F ISym2X=0 I1Cent= 0 IOpClX= 0 NMat=1

NMatS=1 NMatT=0.

\*\*\*\*\* Axes restored to original set \*\*\*\*\*

Cartesian Forces: Max 0.000000000 RMS 0.000000000

CPIOFr: IOpCl= 0 IRwI=-1 IRwCP= 731 ICalc= 8 LCPTot= 360618 Len1MO=  
931578 IndFrg= 8744820

CPIOFr: IOpCl= 0 IRwI=-2 IRwCP= 731 ICalc= 0 LCPTot= 360618 Len1MO=  
931578 IndFrg= 1292196

Counterpoise corrected energy = -1788.246260161371

BSSE energy = 0.013765434452

sum of monomers = -1788.404059532870

complexation energy = 90.38 kcal/mole (raw)

**complexation energy = 99.02 kcal/mole (corrected)**

### v. K-3k-K-K

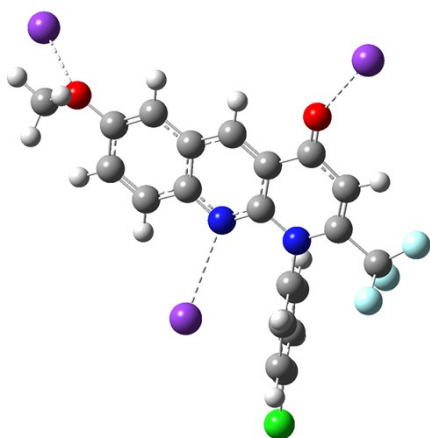

### Cartesian coordinates of optimized structure

| Center Number | Atomic Number | Atomic Type | Coordinates (Angstroms) |           |           |
|---------------|---------------|-------------|-------------------------|-----------|-----------|
|               |               |             | X                       | Y         | Z         |
| 1             | 6             | 0           | 3.657248                | -2.165979 | -0.226365 |
| 2             | 6             | 0           | 2.296922                | -2.049342 | -0.154719 |
| 3             | 6             | 0           | 1.663948                | -0.777025 | -0.158746 |
| 4             | 6             | 0           | 2.500871                | 0.374308  | -0.209153 |
| 5             | 6             | 0           | 3.913069                | 0.233140  | -0.285738 |
| 6             | 6             | 0           | 4.476184                | -1.011483 | -0.298555 |
| 7             | 6             | 0           | 1.864455                | 1.624497  | -0.181820 |
| 8             | 6             | 0           | 0.495054                | 1.708768  | -0.092522 |
| 9             | 6             | 0           | -0.254747               | 0.492008  | -0.049883 |
| 10            | 6             | 0           | -2.259311               | 1.797508  | 0.165127  |
| 11            | 6             | 0           | -1.590825               | 2.972200  | 0.119932  |
| 12            | 6             | 0           | -0.163309               | 3.026643  | -0.039263 |
| 13            | 1             | 0           | 1.690323                | -2.942910 | -0.061750 |
| 14            | 1             | 0           | 4.539197                | 1.118021  | -0.336884 |
| 15            | 1             | 0           | 2.432943                | 2.548213  | -0.221863 |
| 16            | 1             | 0           | -2.144401               | 3.894620  | 0.215105  |
| 17            | 6             | 0           | -2.429421               | -0.653080 | 0.087652  |
| 18            | 6             | 0           | -3.118176               | -1.057190 | -1.051898 |



|    |    |   |           |           |           |
|----|----|---|-----------|-----------|-----------|
| 19 | 6  | 0 | -2.546933 | -1.368752 | 1.276644  |
| 20 | 6  | 0 | -3.937092 | -2.182619 | -1.004676 |
| 21 | 1  | 0 | -3.048868 | -0.476930 | -1.965430 |
| 22 | 6  | 0 | -3.353540 | -2.498535 | 1.327543  |
| 23 | 1  | 0 | -2.029345 | -1.029422 | 2.167218  |
| 24 | 6  | 0 | -4.052507 | -2.900065 | 0.186176  |
| 25 | 1  | 0 | -4.509058 | -2.484494 | -1.875483 |
| 26 | 1  | 0 | -3.474450 | -3.048392 | 2.254327  |
| 27 | 6  | 0 | -3.777039 | 1.846008  | 0.347726  |
| 28 | 7  | 0 | -1.646942 | 0.563448  | 0.056164  |
| 29 | 9  | 0 | -4.171375 | 3.095647  | 0.570854  |
| 30 | 9  | 0 | -4.398384 | 1.407580  | -0.751361 |
| 31 | 9  | 0 | -4.156170 | 1.097361  | 1.383916  |
| 32 | 7  | 0 | 0.306258  | -0.704912 | -0.105104 |
| 33 | 8  | 0 | 0.472165  | 4.086390  | -0.112899 |
| 34 | 1  | 0 | 4.129283  | -3.143038 | -0.219360 |
| 35 | 6  | 0 | 6.311881  | -1.294863 | -1.734282 |
| 36 | 1  | 0 | 5.867887  | -2.168807 | -2.218967 |
| 37 | 1  | 0 | 6.070168  | -0.395610 | -2.306485 |
| 38 | 1  | 0 | 7.396080  | -1.417001 | -1.704755 |
| 39 | 8  | 0 | 5.850059  | -1.171038 | -0.374277 |
| 40 | 17 | 0 | -5.059162 | -4.301433 | 0.248469  |
| 41 | 19 | 0 | 0.583215  | 6.739858  | -0.240015 |
| 42 | 19 | 0 | -1.007923 | -3.454323 | -0.853268 |
| 43 | 19 | 0 | 8.016599  | -1.536305 | 1.478576  |

-----  
Rotational constants (GHZ): 0.1079116 0.0637180 0.0421561

SCF Done: E(RCAM-B3LYP) = -27.9367253505 A.U. after 1 cycles

NFock= 1 Conv=0.12D-12 -V/T= 3.7447

QCSCF skips out because SCF is already converged.

Calling FoFJK, ICntrl= 2127 FMM=F ISym2X=0 IICent= 0 IOPClX= 0 NMat=1  
NMatS=1 NMatT=0.

\*\*\*\*\* Axes restored to original set \*\*\*\*\*

Cartesian Forces: Max 0.000000000 RMS 0.000000000

CPIOFr: IOPCl= 0 IRwI=-1 IRwCP= 731 ICalc= 8 LCPTot= 378120 Len1MO=  
978558 IndFrg= 9185142

CPIOFr: IOPCl= 0 IRwI=-2 IRwCP= 731 ICalc= 0 LCPTot= 378120 Len1MO=  
978558 IndFrg= 1356678

Counterpoise corrected energy = -1872.159612347651

BSSE energy = 0.010412232030

sum of monomers = -1872.239679701604

complexation energy = 43.71 kcal/mole (raw)

**complexation energy = 50.24 kcal/mole (corrected)**

vi. Ca-3k-Ca-Ca

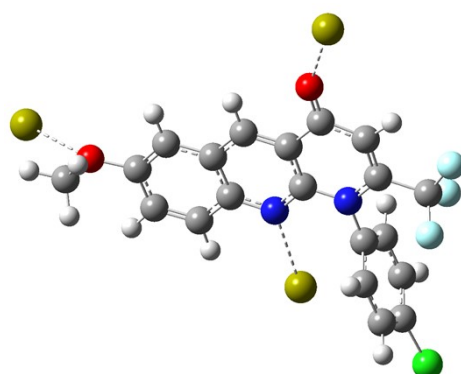

Cartesian coordinates of optimized structure

| Center Number | Atomic Number | Atomic Type | Coordinates (Angstroms) |           |           |
|---------------|---------------|-------------|-------------------------|-----------|-----------|
|               |               |             | X                       | Y         | Z         |
| 1             | 6             | 0           | -3.781943               | -2.072588 | 0.118674  |
| 2             | 6             | 0           | -2.413444               | -2.001638 | 0.062157  |
| 3             | 6             | 0           | -1.723003               | -0.762115 | 0.033787  |
| 4             | 6             | 0           | -2.519552               | 0.420205  | 0.034744  |
| 5             | 6             | 0           | -3.946964               | 0.332635  | 0.082549  |
| 6             | 6             | 0           | -4.561116               | -0.890668 | 0.132335  |
| 7             | 6             | 0           | -1.837468               | 1.650970  | 0.016067  |
| 8             | 6             | 0           | -0.455290               | 1.704284  | -0.005042 |
| 9             | 6             | 0           | 0.263397                | 0.455696  | -0.009444 |
| 10            | 6             | 0           | 2.319885                | 1.693207  | -0.078550 |
| 11            | 6             | 0           | 1.677570                | 2.890684  | -0.070004 |
| 12            | 6             | 0           | 0.264768                | 2.993087  | -0.019682 |
| 13            | 1             | 0           | -1.866494               | -2.942336 | 0.049400  |
| 14            | 1             | 0           | -4.528919               | 1.249151  | 0.100827  |
| 15            | 1             | 0           | -2.389327               | 2.585847  | 0.021830  |
| 16            | 1             | 0           | 2.288035                | 3.782713  | -0.102733 |
| 17            | 6             | 0           | 2.430841                | -0.742258 | -0.025176 |
| 18            | 6             | 0           | 2.892887                | -1.258382 | 1.194180  |
| 19            | 6             | 0           | 2.815068                | -1.339256 | -1.234332 |
| 20            | 6             | 0           | 3.704659                | -2.395824 | 1.208662  |
| 21            | 1             | 0           | 2.655223                | -0.761628 | 2.131246  |
| 22            | 6             | 0           | 3.626232                | -2.476837 | -1.224504 |
| 23            | 1             | 0           | 2.516126                | -0.905385 | -2.184820 |
| 24            | 6             | 0           | 4.113149                | -2.994901 | -0.003708 |
| 25            | 1             | 0           | 4.104166                | -2.767518 | 2.149438  |
| 26            | 1             | 0           | 3.965384                | -2.911569 | -2.161848 |
| 27            | 6             | 0           | 3.864206                | 1.699985  | -0.138612 |
| 28            | 7             | 0           | 1.657470                | 0.486433  | -0.039079 |
| 29            | 9             | 0           | 4.294166                | 2.947335  | -0.185113 |
| 30            | 9             | 0           | 4.355999                | 1.105973  | 0.943909  |
| 31            | 9             | 0           | 4.267727                | 1.054701  | -1.228302 |
| 32            | 7             | 0           | -0.348713               | -0.737227 | 0.015974  |
| 33            | 8             | 0           | -0.320565               | 4.117834  | 0.008160  |

|    |    |   |           |           |           |
|----|----|---|-----------|-----------|-----------|
| 34 | 1  | 0 | -4.267584 | -3.042376 | 0.166366  |
| 35 | 6  | 0 | -6.341839 | -0.885765 | 1.692629  |
| 36 | 1  | 0 | -5.875904 | -1.680546 | 2.277737  |
| 37 | 1  | 0 | -6.055164 | 0.094159  | 2.075293  |
| 38 | 1  | 0 | -7.431681 | -0.979401 | 1.775583  |
| 39 | 8  | 0 | -5.968243 | -1.009164 | 0.271220  |
| 40 | 17 | 0 | 5.187667  | -4.305980 | 0.005269  |
| 41 | 20 | 0 | 0.992859  | -3.063516 | 0.110227  |
| 42 | 20 | 0 | -0.235526 | 6.447018  | 0.055178  |
| 43 | 20 | 0 | -8.195750 | -1.569925 | -0.907206 |

-----  
 Rotational constants (GHZ): 0.1163267 0.0618908 0.0418593

SCF Done: E(RCAM-B3LYP) = -35.8434693286 A.U. after 1 cycles

NFock= 1 Conv=0.41D-15 -V/T= 3.8132

QCSCF skips out because SCF is already converged.

Calling FoFJK, ICntrl= 2127 FMM=F ISym2X=0 I1Cent= 0 IOpClX= 0 NMat=1  
 NMatS=1 NMatT=0.

\*\*\*\*\* Axes restored to original set \*\*\*\*\*

Cartesian Forces: Max 0.000000000 RMS 0.000000000

CPIOFr: IOpCl= 0 IRwI=-1 IRwCP= 731 ICalc= 8 LCPTot= 378120 Len1MO=  
 978558 IndFrg= 9185142

CPIOFr: IOpCl= 0 IRwI=-2 IRwCP= 731 ICalc= 0 LCPTot= 378120 Len1MO=  
 978558 IndFrg= 1356678

Counterpoise corrected energy = -1895.609107521840

BSSE energy = 0.012587770584

sum of monomers = -1895.945414799272

complexation energy = 203.14 kcal/mole (raw)

**complexation energy = 211.04 kcal/mole (corrected)**

### vii. Rb-3k-Rb-Rb

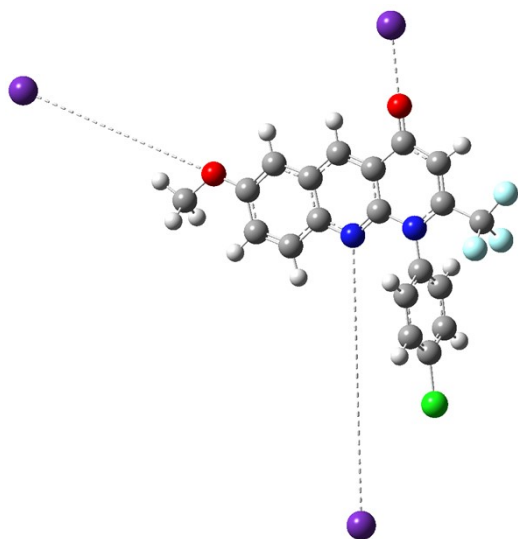

-----  
 Cartesian coordinates of optimized structure

| Center<br>Number | Atomic<br>Number | Forces (Hartrees/Bohr) |              |              |
|------------------|------------------|------------------------|--------------|--------------|
|                  |                  | X                      | Y            | Z            |
| 1                | 6                | 0.000034785            | 0.002264219  | 0.000947214  |
| 2                | 6                | -0.003906814           | -0.008781000 | 0.000362396  |
| 3                | 6                | -0.000823251           | -0.000744958 | 0.000281230  |
| 4                | 6                | -0.001159989           | 0.002902708  | -0.000021931 |
| 5                | 6                | 0.000603034            | -0.000194358 | -0.000026800 |
| 6                | 6                | 0.003661788            | 0.001394080  | -0.000008373 |
| 7                | 6                | 0.002674123            | -0.001907046 | -0.000110103 |
| 8                | 6                | -0.000795737           | -0.000525680 | 0.001833224  |
| 9                | 6                | -0.001807189           | 0.002468530  | -0.003617364 |
| 10               | 6                | -0.000038833           | -0.000389503 | -0.001101391 |
| 11               | 6                | 0.002179047            | -0.001879133 | 0.001626785  |
| 12               | 6                | 0.001695555            | -0.004360329 | -0.001858635 |
| 13               | 1                | 0.000211628            | 0.004040216  | -0.000335526 |
| 14               | 1                | 0.000285633            | 0.000003736  | 0.000041526  |
| 15               | 1                | 0.000459906            | -0.000176474 | 0.000052591  |
| 16               | 1                | 0.000095076            | 0.000671303  | -0.000268805 |
| 17               | 6                | -0.000936233           | 0.003812066  | 0.001316571  |
| 18               | 6                | 0.000741137            | 0.001287045  | -0.000579680 |
| 19               | 6                | 0.000448562            | 0.002690843  | -0.000085191 |
| 20               | 6                | 0.000020509            | 0.000094736  | -0.000424816 |
| 21               | 1                | -0.000009315           | -0.000746172 | -0.000179416 |
| 22               | 6                | -0.000081910           | 0.000732741  | -0.000005358 |
| 23               | 1                | -0.000169996           | -0.000375862 | 0.000419158  |
| 24               | 6                | 0.001725765            | -0.001839297 | 0.000338042  |
| 25               | 1                | -0.000056982           | 0.000510041  | 0.000373609  |
| 26               | 1                | -0.000051644           | -0.000325992 | -0.000174831 |
| 27               | 6                | -0.004397106           | 0.002272107  | 0.000240886  |
| 28               | 7                | 0.000366507            | 0.000204925  | 0.000387013  |
| 29               | 9                | -0.000238336           | -0.002302469 | 0.000209338  |
| 30               | 9                | 0.000970031            | -0.000256180 | 0.000241051  |
| 31               | 9                | 0.001415078            | -0.001782538 | -0.000379765 |
| 32               | 7                | 0.000715517            | -0.002656823 | 0.000525083  |
| 33               | 8                | 0.001214005            | 0.006006431  | 0.000642820  |
| 34               | 1                | 0.000166856            | 0.000096496  | -0.000405817 |
| 35               | 6                | 0.002252503            | -0.001683174 | -0.000761459 |
| 36               | 1                | 0.000078389            | 0.000585099  | 0.000076165  |
| 37               | 1                | -0.000137770           | 0.000153919  | 0.000265390  |
| 38               | 1                | -0.000250113           | 0.001237417  | -0.000040837 |
| 39               | 8                | -0.005620995           | -0.001962104 | 0.000355409  |
| 40               | 17               | -0.001844935           | 0.000376254  | -0.000107896 |
| 41               | 37               | -0.001053955           | -0.000862786 | -0.000028503 |
| 42               | 37               | 0.000397924            | -0.002098811 | 0.000074047  |
| 43               | 37               | 0.000967742            | 0.002045779  | -0.000087048 |

-----  
Cartesian Forces: Max 0.008781000 RMS 0.001755589

SCF Done: E(RCAM-B3LYP) = -23.6734311154 A.U. after 1 cycles

NFock= 1 Conv=0.34D-13 -V/T= 4.3225  
 QCSCF skips out because SCF is already converged.  
 Calling FoFJK, ICntrl= 2127 FMM=F ISym2X=0 IICent= 0 IOpClX= 0 NMat=1  
 NMatS=1 NMatT=0.

\*\*\*\*\* Axes restored to original set \*\*\*\*\*

Cartesian Forces: Max 0.000000000 RMS 0.000000000  
 CPIOFr: IOpCl= 0 IRwI=-1 IRwCP= 731 ICalc= 8 LCPTot= 378120 Len1MO=  
 978576 IndFrg= 9185304  
 CPIOFr: IOpCl= 0 IRwI=-2 IRwCP= 731 ICalc= 0 LCPTot= 378120 Len1MO=  
 978576 IndFrg= 1356696

Counterpoise corrected energy = -1859.394084083040

BSSE energy = 0.003752020806

sum of monomers = -1859.454969235119

complexation energy = 35.85 kcal/mole (raw)

**complexation energy = 38.21 kcal/mole (corrected)**

### viii. Sr-3k-Sr-Sr

•

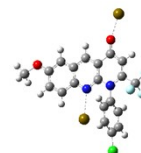

### Cartesian coordinates of optimized structure

| Center Number | Atomic Number | Forces (Hartrees/Bohr) |              |              |
|---------------|---------------|------------------------|--------------|--------------|
|               |               | X                      | Y            | Z            |
| 1             | 6             | 0.000440008            | -0.000684018 | 0.000362102  |
| 2             | 6             | -0.000271194           | 0.000223055  | -0.000154922 |
| 3             | 6             | -0.000051784           | -0.000048238 | 0.000056234  |
| 4             | 6             | 0.000232719            | -0.000301986 | 0.000193132  |
| 5             | 6             | -0.000635733           | 0.000877028  | 0.000024107  |
| 6             | 6             | 0.000265229            | 0.000452462  | -0.000328562 |
| 7             | 6             | -0.000189756           | 0.000149657  | 0.000018259  |
| 8             | 6             | 0.000130020            | 0.000007869  | -0.000049729 |
| 9             | 6             | -0.000236516           | 0.000073744  | 0.000070540  |
| 10            | 6             | 0.000048251            | -0.000063478 | 0.000034695  |
| 11            | 6             | -0.000056078           | 0.000040142  | 0.000028047  |
| 12            | 6             | 0.000272884            | -0.000149940 | -0.000166825 |

|    |    |              |              |              |
|----|----|--------------|--------------|--------------|
| 13 | 1  | 0.000105099  | 0.000006027  | -0.000089856 |
| 14 | 1  | 0.000180907  | -0.000136033 | 0.000093693  |
| 15 | 1  | 0.000012283  | -0.000043935 | 0.000034263  |
| 16 | 1  | 0.000003542  | 0.000011032  | -0.000019268 |
| 17 | 6  | -0.000171144 | 0.000032171  | -0.000174763 |
| 18 | 6  | 0.000005713  | -0.000066139 | -0.000049768 |
| 19 | 6  | -0.000029051 | -0.000044470 | 0.000038606  |
| 20 | 6  | -0.000021997 | -0.000001264 | 0.000001941  |
| 21 | 1  | 0.000033178  | 0.000013626  | 0.000026843  |
| 22 | 6  | 0.000046461  | 0.000014922  | -0.000027825 |
| 23 | 1  | 0.000020500  | -0.000014915 | 0.000079842  |
| 24 | 6  | -0.000004505 | 0.000085528  | 0.000047330  |
| 25 | 1  | 0.000007440  | 0.000044108  | -0.000029431 |
| 26 | 1  | 0.000032966  | 0.000003517  | 0.000003945  |
| 27 | 6  | 0.000146842  | -0.000021703 | -0.000002348 |
| 28 | 7  | 0.000108793  | 0.000298426  | 0.000116243  |
| 29 | 9  | 0.000031572  | -0.000003751 | -0.000065807 |
| 30 | 9  | -0.000069667 | 0.000087217  | -0.000093858 |
| 31 | 9  | -0.000018610 | -0.000069841 | 0.000035006  |
| 32 | 7  | 0.000058142  | 0.000100093  | -0.000022115 |
| 33 | 8  | -0.000365024 | 0.000046269  | 0.000321209  |
| 34 | 1  | -0.000168895 | 0.000110565  | -0.000147130 |
| 35 | 6  | 0.000370995  | 0.000626066  | 0.000100762  |
| 36 | 1  | -0.000048484 | -0.000060451 | -0.000028300 |
| 37 | 1  | 0.000049846  | -0.000073423 | -0.000163762 |
| 38 | 1  | -0.000089780 | 0.000130392  | 0.000024194  |
| 39 | 8  | -0.000664895 | -0.001805703 | 0.000174908  |
| 40 | 17 | 0.000059689  | -0.000021070 | -0.000054744 |
| 41 | 38 | 0.000241301  | 0.000023708  | -0.000082577 |
| 42 | 38 | 0.000082400  | -0.000045788 | -0.000102554 |
| 43 | 38 | 0.000106332  | 0.000198520  | -0.000031757 |

-----  
Cartesian Forces: Max 0.001805703 RMS 0.000250883

SCF Done: E(RCAM-B3LYP) = -29.7755564424 A.U. after 1 cycles

NFock= 1 Conv=0.30D-15 -V/T= 4.4694

QCSCF skips out because SCF is already converged.

Calling FoFJK, ICntrl= 2127 FMM=F ISym2X=0 I1Cent= 0 IOpClX= 0 NMat=1  
NMatS=1 NMatT=0.

\*\*\*\*\* Axes restored to original set \*\*\*\*\*

Cartesian Forces: Max 0.000000000 RMS 0.000000000

CPIOFr: IOpCl= 0 IRwI=-1 IRwCP= 731 ICalc= 8 LCPTot= 378120 Len1MO=  
978576 IndFrg= 9185304

CPIOFr: IOpCl= 0 IRwI=-2 IRwCP= 731 ICalc= 0 LCPTot= 378120 Len1MO=  
978576 IndFrg= 1356696

Counterpoise corrected energy = -1877.722924607608

BSSE energy = 0.009086538520

sum of monomers = -1877.751828392092

complexation energy = 12.44 kcal/mole (raw)

**complexation energy = 18.14 kcal/mole (corrected)**

ix. Cs-3k-Cs-Cs

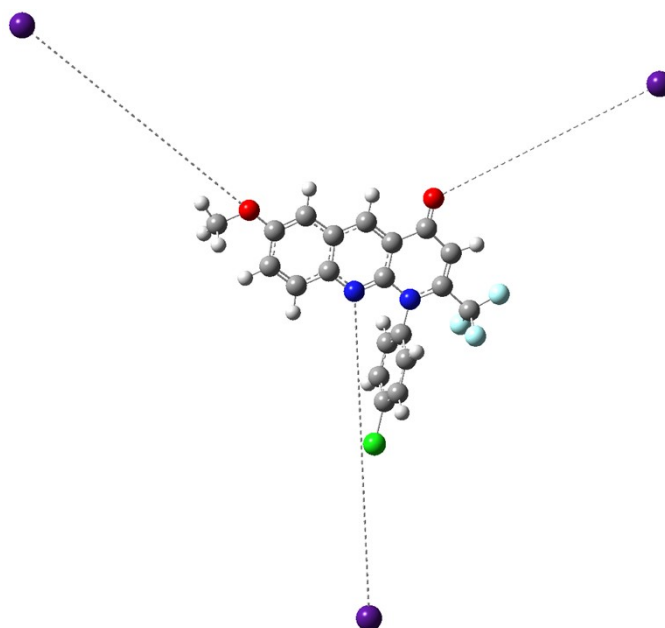

Cartesian coordinates of optimized structure

| Center Number | Atomic Number | Forces (Hartrees/Bohr) |              |              |
|---------------|---------------|------------------------|--------------|--------------|
|               |               | X                      | Y            | Z            |
| 1             | 6             | -0.000540060           | -0.000533253 | 0.000005769  |
| 2             | 6             | 0.000231823            | -0.000128822 | 0.000207315  |
| 3             | 6             | -0.001137740           | 0.000595126  | -0.000342688 |
| 4             | 6             | -0.000509110           | 0.000613428  | -0.000233514 |
| 5             | 6             | 0.000539590            | -0.000806900 | 0.000125126  |
| 6             | 6             | -0.002094397           | 0.001984636  | 0.000433302  |
| 7             | 6             | 0.000597919            | -0.000163232 | -0.000071050 |
| 8             | 6             | -0.000025688           | -0.000769318 | -0.000121348 |
| 9             | 6             | -0.001366191           | 0.000399328  | -0.000060331 |
| 10            | 6             | -0.000248379           | -0.000101046 | 0.000031911  |
| 11            | 6             | -0.000061823           | 0.000396166  | -0.000041475 |
| 12            | 6             | -0.000543251           | 0.000820731  | 0.000904335  |
| 13            | 1             | -0.000169076           | -0.000112655 | 0.000001367  |
| 14            | 1             | -0.000081294           | 0.000098506  | -0.000010413 |
| 15            | 1             | -0.000112201           | 0.000043833  | 0.000004041  |
| 16            | 1             | -0.000021125           | -0.000203488 | -0.000081230 |
| 17            | 6             | 0.000398107            | -0.000673562 | 0.000815676  |
| 18            | 6             | 0.000028008            | 0.000294502  | -0.000095049 |
| 19            | 6             | -0.000035499           | -0.000754463 | -0.000402140 |
| 20            | 6             | 0.000313361            | 0.000521494  | -0.000571514 |
| 21            | 1             | 0.000085856            | -0.000228848 | 0.000119283  |
| 22            | 6             | 0.000405672            | 0.001046175  | -0.000060587 |
| 23            | 1             | 0.000040416            | 0.000009155  | 0.000017253  |
| 24            | 6             | -0.000742956           | -0.001645532 | 0.000406896  |
| 25            | 1             | -0.000090929           | -0.000019845 | 0.000236001  |
| 26            | 1             | 0.000043272            | -0.000149344 | -0.000191226 |

|    |    |              |              |              |
|----|----|--------------|--------------|--------------|
| 27 | 6  | 0.000038360  | 0.000273337  | -0.000677569 |
| 28 | 7  | 0.000787521  | 0.000457195  | -0.000346125 |
| 29 | 9  | 0.000150253  | -0.000223318 | 0.000031361  |
| 30 | 9  | -0.000200386 | -0.000124134 | 0.000778395  |
| 31 | 9  | -0.000159750 | 0.000294260  | -0.000189817 |
| 32 | 7  | 0.001374766  | -0.001091064 | 0.000377290  |
| 33 | 8  | 0.000385057  | 0.000040778  | -0.000525934 |
| 34 | 1  | -0.000468699 | 0.000121828  | 0.000074633  |
| 35 | 6  | 0.002045545  | -0.000354386 | 0.000070206  |
| 36 | 1  | 0.000390102  | 0.000194166  | -0.000141302 |
| 37 | 1  | -0.000101300 | -0.000132775 | 0.000060048  |
| 38 | 1  | 0.000378958  | -0.000021481 | 0.000166100  |
| 39 | 8  | 0.000873042  | -0.000678173 | -0.000699066 |
| 40 | 17 | -0.000074280 | 0.000742824  | -0.000025362 |
| 41 | 55 | 0.000306494  | 0.000432723  | 0.000019123  |
| 42 | 55 | -0.000784128 | -0.000058301 | 0.000024675  |
| 43 | 55 | 0.000154141  | -0.000406250 | -0.000022364 |

-----  
Cartesian Forces: Max 0.002094397 RMS 0.000555593

SCF Done: E(RCAM-B3LYP) = -19.7019955092 A.U. after 1 cycles

NFock= 1 Conv=0.75D-12 -V/T= 5.0390

QCSCF skips out because SCF is already converged.

Calling FoFJK, ICntrl= 2127 FMM=F ISym2X=0 I1Cent= 0 IOpClX= 0 NMat=1  
NMatS=1 NMatT=0.

\*\*\*\*\* Axes restored to original set \*\*\*\*\*

Cartesian Forces: Max 0.000000000 RMS 0.000000000

CPIOFr: IOpCl= 0 IRwI=-1 IRwCP= 731 ICalc= 8 LCPTot= 378120 Len1MO=  
978576 IndFrg= 9185304

CPIOFr: IOpCl= 0 IRwI=-2 IRwCP= 731 ICalc= 0 LCPTot= 378120 Len1MO=  
978576 IndFrg= 1356696

Counterpoise corrected energy = -1847.485037079681

BSSE energy = 0.000108722425

sum of monomers = -1847.542720773608

complexation energy = 36.13 kcal/mole (raw)

**complexation energy = 36.20 kcal/mole (corrected)**

#### x. Ba-3k-Ba-Ba

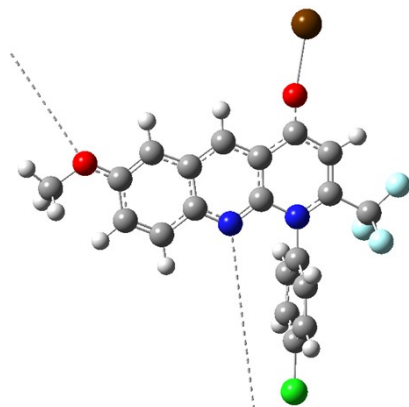



### Cartesian coordinates of optimized structure

| Center<br>Number | Atomic<br>Number | Forces (Hartrees/Bohr) |              |              |
|------------------|------------------|------------------------|--------------|--------------|
|                  |                  | X                      | Y            | Z            |
| 1                | 6                | 0.001116582            | 0.000217133  | -0.000148014 |
| 2                | 6                | 0.001116012            | 0.001188038  | 0.000524990  |
| 3                | 6                | 0.000578120            | -0.000614086 | -0.000251506 |
| 4                | 6                | 0.000174142            | -0.000984181 | -0.000227017 |
| 5                | 6                | -0.000948634           | 0.000555871  | 0.000338193  |
| 6                | 6                | 0.000258323            | -0.001411306 | -0.000460954 |
| 7                | 6                | -0.000635373           | 0.000007536  | 0.000070494  |
| 8                | 6                | -0.000866417           | 0.000133242  | 0.000120652  |
| 9                | 6                | -0.001090976           | 0.000899284  | 0.000333773  |
| 10               | 6                | -0.000152536           | 0.000450183  | 0.000496503  |
| 11               | 6                | -0.000133504           | 0.000371679  | 0.000052621  |
| 12               | 6                | -0.000534681           | -0.000288982 | 0.000188274  |
| 13               | 1                | -0.000060482           | 0.000423358  | -0.000176556 |
| 14               | 1                | -0.000162077           | -0.000048734 | -0.000002524 |
| 15               | 1                | -0.000245448           | -0.000103741 | -0.000001044 |
| 16               | 1                | 0.000292965            | -0.000387915 | -0.000162650 |
| 17               | 6                | 0.000441681            | -0.000461239 | 0.000094929  |
| 18               | 6                | -0.000125752           | -0.000272254 | 0.000247256  |
| 19               | 6                | -0.000386377           | -0.000186994 | -0.000425365 |
| 20               | 6                | 0.000360882            | 0.000262282  | -0.000523703 |
| 21               | 1                | 0.000139837            | -0.000047070 | 0.000324281  |
| 22               | 6                | 0.000167949            | 0.000104301  | -0.000248467 |
| 23               | 1                | 0.000202532            | 0.000190172  | -0.000443213 |
| 24               | 6                | 0.000067979            | -0.000087598 | 0.000443694  |
| 25               | 1                | -0.000079644           | -0.000157412 | 0.000548256  |
| 26               | 1                | -0.000221272           | 0.000064718  | -0.000428480 |
| 27               | 6                | -0.000061583           | 0.000341787  | -0.001095682 |
| 28               | 7                | -0.000030613           | 0.000813662  | 0.000335485  |
| 29               | 9                | 0.000134446            | -0.000686261 | -0.000216614 |
| 30               | 9                | -0.000315580           | -0.000223890 | 0.000698486  |
| 31               | 9                | 0.000274320            | -0.000187016 | 0.000154025  |
| 32               | 7                | 0.001977564            | -0.000664571 | -0.000463230 |
| 33               | 8                | 0.000462256            | -0.000120559 | -0.000233254 |
| 34               | 1                | -0.001170295           | 0.000833209  | 0.000347682  |
| 35               | 6                | -0.000179646           | 0.000861384  | 0.000188937  |
| 36               | 1                | -0.000430040           | 0.000004596  | -0.000461563 |
| 37               | 1                | -0.000214806           | -0.000347305 | 0.000534389  |
| 38               | 1                | -0.000330103           | 0.000254902  | 0.000012325  |
| 39               | 8                | 0.000572697            | -0.000676153 | -0.000155130 |
| 40               | 17               | 0.000179047            | 0.000050207  | 0.000037954  |
| 41               | 56               | -0.000057121           | -0.000039563 | -0.000000490 |
| 42               | 56               | -0.000118221           | -0.000085901 | 0.000034366  |
| 43               | 56               | 0.000033848            | 0.000055188  | -0.000002111 |

Cartesian Forces: Max 0.001977564 RMS 0.000485585

SCF Done: E(RCAM-B3LYP) = -24.6184076656 A.U. after 1 cycles  
NFock= 1 Conv=0.53D-14 -V/T= 5.2125  
QCSCF skips out because SCF is already converged.  
Calling FoFJK, ICntrl= 2127 FMM=F ISym2X=0 I1Cent= 0 IOpClX= 0 NMat=1  
NMatS=1 NMatT=0.  
\*\*\*\*\* Axes restored to original set \*\*\*\*\*  
Cartesian Forces: Max 0.000000000 RMS 0.000000000  
CPIOFr: IOpCl= 0 IRwI=-1 IRwCP= 731 ICalc= 8 LCPTot= 378120 Len1MO=  
978576 IndFrg= 9185304  
CPIOFr: IOpCl= 0 IRwI=-2 IRwCP= 731 ICalc= 0 LCPTot= 378120 Len1MO=  
978576 IndFrg= 1356696  
Counterpoise corrected energy = -1862.377304852748  
BSSE energy = 0.004354600380  
sum of monomers = -1862.283405026697  
complexation energy = -61.66 kcal/mole (raw)  
**complexation energy = -58.92 kcal/mole (corrected)**
